# Supplementary material for: Rongalite/iodine-mediated C(sp 3 )–H bond oximation and thiomethylation reaction of methyl ketones using copper nitrate as the [NO] reagent: synthesis of thiohydroximic acids
Source: Royal Society of Chemistry journal article supplement (doi:10.1039/d4ob01217h), 2024-01-01

## Supporting Information

# Rongalite/Iodine-Mediated C(sp<sup>3</sup>)-H Bond Oximation and Thiomethylation Reaction of Methyl Ketones Using Copper Nitrate as the [NO] Reagent: Synthesis of Thiohydroxamic Acids

Miao Wang,<sup>a</sup> Hui-Ying Ren,<sup>a,c</sup> Xiao-Yu Pu,<sup>a</sup> Xiao-Lu Zhang,<sup>a</sup> He-Ying Zhu,<sup>a</sup> An-Xin Wu<sup>\*,b</sup> and Bang-Tun Zhao<sup>\*,a</sup>

<sup>a</sup> College of Chemistry and Chemical Engineering, Key Laboratory of Function-Oriented Porous Materials of Henan Province, Luoyang Normal University, Luoyang, Henan 471934, P. R. China.

<sup>b</sup> Key Laboratory of Pesticide & Chemical Biology, Ministry of Education, College of Chemistry, Central China Normal University, Hubei, Wuhan 430079, P. R. China

<sup>c</sup> College of Chemistry, Zhengzhou University, Zhengzhou, Henan 450001, P. R. China

E-mail: zhao885790@126.com; chwuax@mail.ccnu.edu.cn.

| Table of Contents                                          | page       |
|------------------------------------------------------------|------------|
| 1. General.....                                            | pp.S2      |
| 2. General procedure for the synthesis of <b>4</b> .....   | pp.S2      |
| 3. Optimization of the reaction conditions .....           | pp.S3      |
| 4. Evidence in support of the mechanism.....               | pp.S4      |
| 5. Characterization data for target compound.....          | pp.S5-S15  |
| 6. Copies of <sup>1</sup> H NMR, <sup>13</sup> C NMR ..... | pp.S16-S53 |

## 1. General.

All substrates and reagents were commercially available and used without further purification. TLC analysis was performed using pre-coated glass plates. Column chromatography was performed using silica gel (200–300 mesh).  $^1\text{H}$  spectra were recorded in  $\text{CDCl}_3$  or  $\text{DMSO-}d_6$  on 400/600 MHz NMR spectrometers and resonances ( $\delta$ ) are given in parts per million relative to tetramethylsilane. Data are reported as follows: chemical shift, multiplicity (s = singlet, d = doublet, t = triplet, m = multiplet, q = quadruple), coupling constants (Hz) and integration.  $^{13}\text{C}$  spectra were recorded in  $\text{CDCl}_3$  or  $\text{DMSO-}d_6$  on 100/150 MHz NMR spectrometers and resonances ( $\delta$ ) are given in ppm. HRMS were obtained on a Bruker 7-tesla FT-ICR MS or an Agilent 1290 LC/MS with the TOF analyzer. Melting points were determined using XT-4 apparatus and not corrected.

## 2. General procedure for the synthesis of 4 (4a as an example).

A mixture of acetophenone **1a** (0.3 mmol, 36.0 mg),  $\text{Cu}(\text{NO}_3)_2 \cdot 3\text{H}_2\text{O}$  **2a** (0.3 mmol, 72.6 mg), rongalite (0.75 mmol, 115.5 mg),  $\text{I}_2$  (0.3 mmol, 76.2 mg) and  $\text{Na}_2\text{S} \cdot 9\text{H}_2\text{O}$  (0.3 mmol, 72.1 mg) in DMSO (2.0 mL) was stirred at  $100^\circ\text{C}$  for 3h in a pressure vessel. The resulting mixture was dropped into 50 mL  $\text{H}_2\text{O}$  and extracted with EtOAc 3 times ( $3 \times 50$  mL). The organic extract was dried with anhydrous  $\text{Na}_2\text{SO}_4$ , filtered and concentrated. The crude product was purified by column chromatography on silica gel (eluent: petroleum ether/EtOAc = 5/1) to afford the product **4a** as yellow solid (43.0 mg, 74%).

### 3. Optimization of the Reaction Conditions.

Table S1. Optimization of the Reaction Conditions.<sup>a</sup>

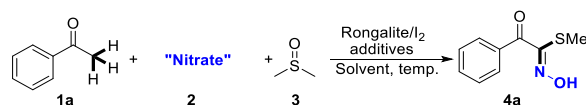

| Entry           | Rongalite (equiv) | Nitrate                                                           | additives                              | Temp (°C)  | Yield (%) |
|-----------------|-------------------|-------------------------------------------------------------------|----------------------------------------|------------|-----------|
| 1               | 2.0               | Cu(NO <sub>3</sub> ) <sub>2</sub> 3H <sub>2</sub> O               | -                                      | 100        | 45        |
| 2               | 2.0               | Al(NO <sub>3</sub> ) <sub>3</sub> 9H <sub>2</sub> O               | -                                      | 100        | 9         |
| 3               | 2.0               | Fe(NO <sub>3</sub> ) <sub>3</sub> 9H <sub>2</sub> O               | -                                      | 100        | 42        |
| 4               | 2.0               | Zn(NO <sub>3</sub> ) <sub>2</sub> 6H <sub>2</sub> O               | -                                      | 100        | trace     |
| 5               | 2.0               | Cd(NO <sub>3</sub> ) <sub>2</sub> 4H <sub>2</sub> O               | -                                      | 100        | 0         |
| 6               | 2.0               | Ce(NH <sub>4</sub> ) <sub>2</sub> (NO <sub>3</sub> ) <sub>6</sub> | -                                      | 100        | 31        |
| 7               | 2.0               | NaNO <sub>3</sub>                                                 | -                                      | 100        | 0         |
| 8               | 2.0               | KNO <sub>3</sub>                                                  | -                                      | 100        | 0         |
| 9               | 2.0               | Cu(NO <sub>3</sub> ) <sub>2</sub> 3H <sub>2</sub> O               | S                                      | 100        | 23        |
| 10              | 2.0               | Cu(NO <sub>3</sub> ) <sub>2</sub> 3H <sub>2</sub> O               | Na <sub>2</sub> S 9H <sub>2</sub> O    | 100        | 68        |
| 11              | 0                 | Cu(NO <sub>3</sub> ) <sub>2</sub> 3H <sub>2</sub> O               | Na <sub>2</sub> S 9H <sub>2</sub> O    | 100        | trace     |
| 12              | 1.0               | Cu(NO <sub>3</sub> ) <sub>2</sub> 3H <sub>2</sub> O               | Na <sub>2</sub> S 9H <sub>2</sub> O    | 100        | 65        |
| 13              | 1.5               | Cu(NO <sub>3</sub> ) <sub>2</sub> 3H <sub>2</sub> O               | Na <sub>2</sub> S 9H <sub>2</sub> O    | 100        | 62        |
| 14              | <b>2.5</b>        | <b>Cu(NO<sub>3</sub>)<sub>2</sub> 3H<sub>2</sub>O</b>             | <b>Na<sub>2</sub>S 9H<sub>2</sub>O</b> | <b>100</b> | <b>74</b> |
| 15              | 2.0               | Cu(NO <sub>3</sub> ) <sub>2</sub> 3H <sub>2</sub> O               | Na <sub>2</sub> S 9H <sub>2</sub> O    | 80         | 67        |
| 16              | 2.0               | Cu(NO <sub>3</sub> ) <sub>2</sub> 3H <sub>2</sub> O               | Na <sub>2</sub> S 9H <sub>2</sub> O    | 90         | 70        |
| 17              | 2.0               | Cu(NO <sub>3</sub> ) <sub>2</sub> 3H <sub>2</sub> O               | Na <sub>2</sub> S 9H <sub>2</sub> O    | 110        | 20        |
| 18 <sup>b</sup> | 2.0               | Cu(NO <sub>3</sub> ) <sub>2</sub> 3H <sub>2</sub> O               | Na <sub>2</sub> S 9H <sub>2</sub> O    | 100        | 0         |
| 19 <sup>c</sup> | 2.0               | Cu(NO <sub>3</sub> ) <sub>2</sub> 3H <sub>2</sub> O               | Na <sub>2</sub> S 9H <sub>2</sub> O    | 100        | 42        |
| 20 <sup>d</sup> | 2.0               | Cu(NO <sub>3</sub> ) <sub>2</sub> 3H <sub>2</sub> O               | Na <sub>2</sub> S 9H <sub>2</sub> O    | 100        | 69        |

<sup>a</sup>Reaction conditions: **1a** (0.3 mmol), Rongalite, I<sub>2</sub> (0.3 mmol) and nitrate (0.3 mmol) in solvent (2.0 mL) at different temperatures in a sealed vessel. The reaction was performed for 3.0 h. Isolated yields based on **1a**. <sup>b</sup> I<sub>2</sub> (0 mmol) was used. <sup>c</sup> I<sub>2</sub> (0.15 mmol) was used. <sup>d</sup> I<sub>2</sub> (0.45 mmol) was used.

## 4. Evidence in support of the mechanism

The reaction of **1a** and **2** was performed in DMSO-*d*<sub>6</sub> under the standard conditions and the deuterated product **4a'** was generated (D > 98%). (Please see below)

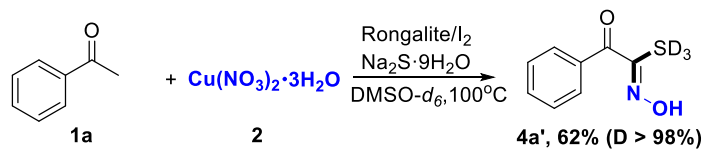

<sup>1</sup>H NMR spectrum of **4a** and **4a'** were shown as below:

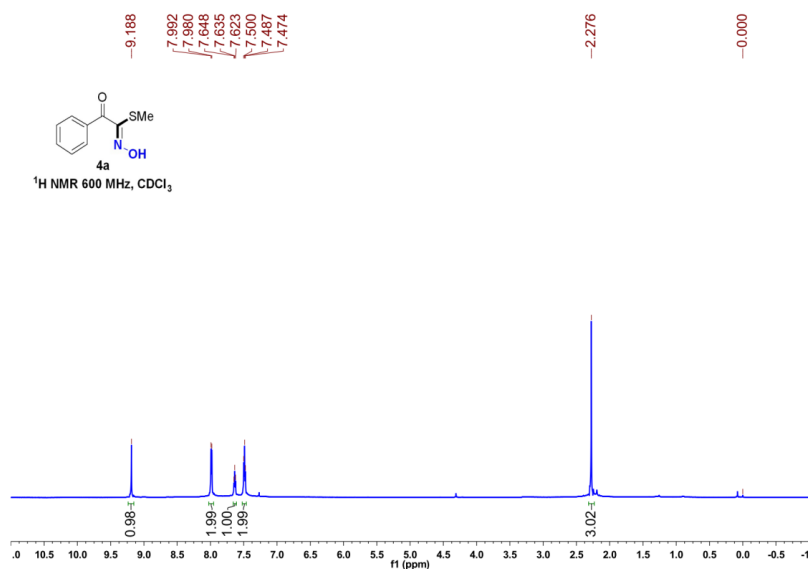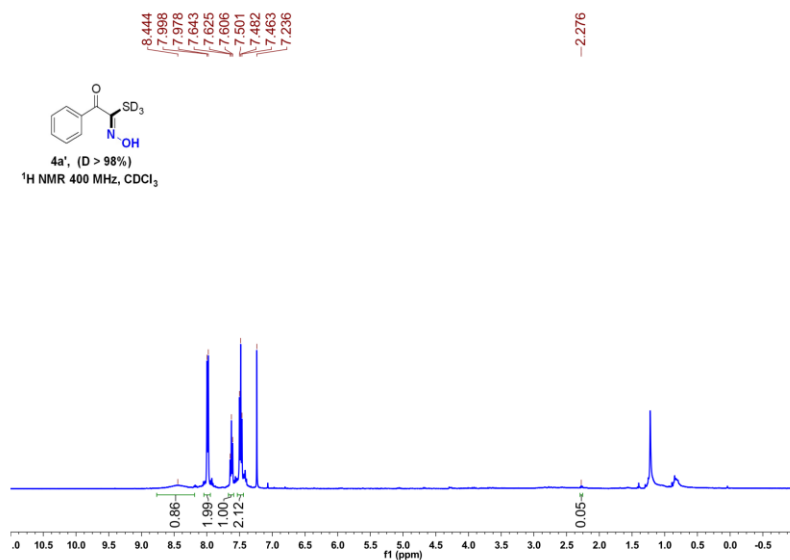

## 5. Characterization data for target compound.

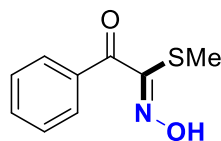

methyl (Z)-*N*-hydroxy-2-oxo-2-phenylethanimidothioate (**4a**):

Yield: 74% (43.0 mg); light yellow oil;  $^1\text{H}$  NMR (600 MHz,  $\text{CDCl}_3$ )  $\delta$  = 9.19 (s, 1H), 7.99 (d,  $J$  = 7.2 Hz, 2H), 7.64 (t,  $J$  = 7.2 Hz, 1H), 7.49 (t,  $J$  = 7.8 Hz, 2H), 2.28 (s, 3H);  $^{13}\text{C}$  NMR (150 MHz,  $\text{CDCl}_3$ )  $\delta$  = 186.6, 154.6, 135.3, 134.5, 130.4, 128.7, 13.3; HRMS (ESI)  $m/z$  calcd for  $\text{C}_9\text{H}_{10}\text{NO}_2\text{S}^+$  ( $\text{M}+\text{H}$ ) $^+$  196.0427, found 196.0423.

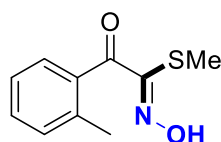

methyl (Z)-*N*-hydroxy-2-oxo-2-(*o*-tolyl)ethanimidothioate (**4b**):

Yield: 66% (41.2 mg); light yellow oil;  $^1\text{H}$  NMR (400 MHz,  $\text{CDCl}_3$ )  $\delta$  = 8.57 (s, 1H), 7.55 (d,  $J$  = 9.2 Hz, 1H), 7.37 (t,  $J$  = 7.6 Hz, 1H), 7.20 – 7.19 (m, 2H), 2.45 (s, 3H), 2.32 (s, 3H);  $^{13}\text{C}$  NMR (100 MHz,  $\text{CDCl}_3$ )  $\delta$  = 189.2, 156.0, 139.6, 135.8, 132.6, 131.8, 131.5, 125.7, 21.0, 13.5. HRMS (ESI)  $m/z$  calcd for  $\text{C}_{10}\text{H}_{12}\text{NO}_2\text{S}^+$  ( $\text{M}+\text{H}$ ) $^+$  210.0583, found 210.0582.

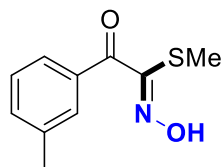

methyl (Z)-*N*-hydroxy-2-oxo-2-(*m*-tolyl)ethanimidothioate (**4c**):

Yield: 69% (43.2 mg); light yellow oil;  $^1\text{H}$  NMR (400 MHz,  $\text{CDCl}_3$ )  $\delta$  = 8.56 (s, 1H), 7.72 (d,  $J$  = 7.2 Hz, 2H), 7.37 (d,  $J$  = 7.6 Hz, 1H), 7.30 (t,  $J$  = 8.0 Hz, 1H), 2.34 (s, 3H), 2.21 (s, 3H);  $^{13}\text{C}$  NMR (100 MHz,  $\text{CDCl}_3$ )  $\delta$  = 186.8, 154.7, 138.7, 135.5, 135.3, 130.7, 128.7, 127.8, 21.3, 13.3. HRMS (ESI)  $m/z$  calcd for  $\text{C}_{10}\text{H}_{12}\text{NO}_2\text{S}^+$  ( $\text{M}+\text{H}$ ) $^+$  210.0583, found 210.0580.

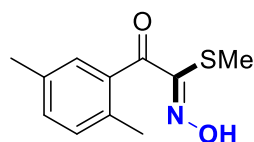

methyl (Z)-2-(2,5-dimethylphenyl)-*N*-hydroxy-2-oxoethanimidothioate (**4d**):

Yield: 60% (40.1 mg); light yellow solid; mp: 96.9–99.1°C;  $^1\text{H}$  NMR (400 MHz,  $\text{CDCl}_3$ )  $\delta$  = 8.46 (s, 1H), 7.34 (s, 1H), 7.19 – 7.16 (m, 1H), 7.08 (d,  $J$  = 7.6 Hz, 1H), 2.39 (s, 3H), 2.32 (s, 3H), 2.27

(s, 3H);  $^{13}\text{C}$  NMR (100 MHz,  $\text{CDCl}_3$ )  $\delta$  = 189.3, 156.1, 136.5, 135.7, 135.4, 133.5, 131.8, 131.7, 20.8, 20.6, 13.5. HRMS (ESI)  $m/z$  calcd for  $\text{C}_{11}\text{H}_{14}\text{NO}_2\text{S}^+$  ( $\text{M}+\text{H}$ ) $^+$  224.0740, found 224.0739.

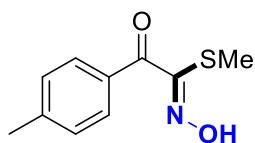

methyl (Z)-*N*-hydroxy-2-oxo-2-(*p*-tolyl)ethanimidothioate (**4e**):

Yield: 72% (45.1 mg); light yellow solid; mp: 66.7–69.5°C;  $^1\text{H}$  NMR (600 MHz,  $\text{CDCl}_3$ )  $\delta$  = 9.18 (s, 1H), 7.91 – 7.89 (m, 2H), 7.29 (d,  $J$  = 7.8 Hz, 2H), 2.43 (s, 3H), 2.26 (s, 3H);  $^{13}\text{C}$  NMR (150 MHz,  $\text{CDCl}_3$ )  $\delta$  = 186.2, 154.7, 145.8, 132.8, 130.5, 129.5, 21.8, 13.2. The data are in agreement with those previously reported in the literature.<sup>1</sup>

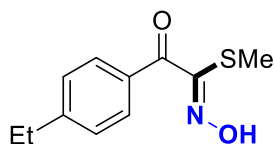

methyl (Z)-2-(4-ethylphenyl)-*N*-hydroxy-2-oxoethanimidothioate (**4f**):

Yield: 70% (46.7 mg); light yellow oil;  $^1\text{H}$  NMR (400 MHz,  $\text{CDCl}_3$ )  $\delta$  = 8.57 (s, 1H), 7.86 (d,  $J$  = 8.4 Hz, 2H), 7.24 (d,  $J$  = 8.0 Hz, 2H), 2.65 (q,  $J$  = 7.6 Hz, 2H), 2.21 (s, 3H), 1.19 (t,  $J$  = 7.6 Hz, 3H);  $^{13}\text{C}$  NMR (100 MHz,  $\text{CDCl}_3$ )  $\delta$  = 186.2, 154.8, 151.9, 133.2, 130.7, 128.4, 29.1, 15.0, 13.3. HRMS (ESI)  $m/z$  calcd for  $\text{C}_{11}\text{H}_{14}\text{NO}_2\text{S}$  ( $\text{M}+\text{H}$ ) $^+$  224.0740, found 224.0739.

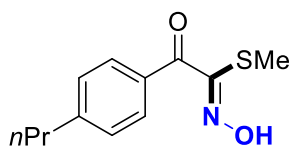

methyl (Z)-*N*-hydroxy-2-oxo-2-(4-propylphenyl)ethanimidothioate (**4g**):

Yield: 65% (46.1 mg); light yellow oil;  $^1\text{H}$  NMR (400 MHz,  $\text{CDCl}_3$ )  $\delta$  = 7.86 (d,  $J$  = 8.0 Hz, 2H), 7.22 (d,  $J$  = 8.0 Hz, 2H), 2.59 (t,  $J$  = 7.6 Hz, 2H), 2.21 (s, 3H), 1.65 – 1.55 (m, 2H), 0.88 (t,  $J$  = 7.2 Hz, 3H);  $^{13}\text{C}$  NMR (100 MHz,  $\text{CDCl}_3$ )  $\delta$  = 186.2, 154.8, 150.4, 133.2, 130.6, 128.9, 38.2, 24.1, 13.7, 13.3. HRMS (ESI)  $m/z$  calcd for  $\text{C}_{12}\text{H}_{16}\text{NO}_2\text{S}$  ( $\text{M}+\text{H}$ ) $^+$  238.0896, found 238.0896.

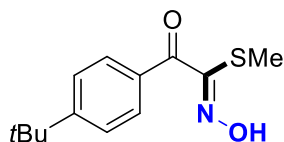

methyl (Z)-2-(4-(tert-butyl)phenyl)-*N*-hydroxy-2-oxoethanimidothioate (**4h**):

Yield: 77% (57.8 mg); light yellow solid; mp: 97.5–98.1°C;  $^1\text{H}$  NMR (400 MHz,  $\text{CDCl}_3$ )  $\delta$  = 8.48 (s, 1H), 7.88 (d,  $J$  = 8.8 Hz, 2H), 7.44 (d,  $J$  = 8.4 Hz, 2H), 2.22 (s, 3H), 1.27 (s, 9H);  $^{13}\text{C}$  NMR (100 MHz,  $\text{CDCl}_3$ )  $\delta$  = 186.2, 158.6, 154.8, 132.9, 130.4, 125.8, 35.3, 31.0, 13.3. HRMS (ESI)  $m/z$  calcd for  $\text{C}_{13}\text{H}_{18}\text{NO}_2\text{S}$  ( $\text{M}+\text{H}$ ) $^+$  252.1053, found 252.1051.

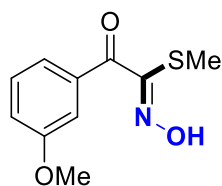

methyl (Z)-*N*-hydroxy-2-(3-methoxyphenyl)-2-oxoethanimidothioate (**4i**):

Yield: 76% (51.1 mg); light yellow oil;  $^1\text{H NMR}$  (400 MHz,  $\text{CDCl}_3$ )  $\delta$  = 8.78 (s, 1H), 7.56 (d,  $J$  = 7.6 Hz, 1H), 8.50 (s, 1H), 7.39 (t,  $J$  = 7.8 Hz, 1H), 7.20 – 7.17 (m, 1H), 3.86 (s, 3H), 2.28 (s, 3H);  $^{13}\text{C NMR}$  (100 MHz,  $\text{CDCl}_3$ )  $\delta$  = 186.4, 159.7, 154.6, 136.5, 129.8, 123.6, 121.5, 113.5, 55.5, 13.3; HRMS (ESI)  $m/z$  calcd for  $\text{C}_{10}\text{H}_{12}\text{NO}_3\text{S}^+$  ( $\text{M}+\text{H}$ ) $^+$  226.0532, found 226.0533.

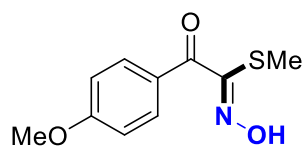

methyl (Z)-*N*-hydroxy-2-(4-methoxyphenyl)-2-oxoethanimidothioate (**4j**):

Yield: 68% (45.8 mg); light yellow oil;  $^1\text{H NMR}$  (400 MHz,  $\text{CDCl}_3$ )  $\delta$  = 9.33 (s, 1H), 7.99 (d,  $J$  = 8.8 Hz, 2H), 6.95 (d,  $J$  = 8.8 Hz, 2H), 3.89 (s, 3H), 2.25 (s, 3H);  $^{13}\text{C NMR}$  (100 MHz,  $\text{CDCl}_3$ )  $\delta$  = 185.0, 164.7, 154.6, 132.9, 128.1, 114.1, 55.6, 13.1; HRMS (ESI)  $m/z$  calcd for  $\text{C}_{10}\text{H}_{12}\text{NO}_3\text{S}^+$  ( $\text{M}+\text{H}$ ) $^+$  226.0532, found 226.0531.

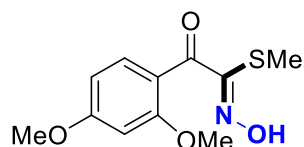

methyl (Z)-2-(2,4-dimethoxyphenyl)-*N*-hydroxy-2-oxoethanimidothioate (**4k**):

Yield: 62% (47.3 mg); white solid, mp: 138.9–141.1 °C;  $^1\text{H NMR}$  (400 MHz,  $\text{CDCl}_3$ )  $\delta$  = 7.70 (d,  $J$  = 8.8 Hz, 1H), 6.55 (d,  $J$  = 8.8 Hz, 1H), 6.46 (s, 1H), 3.87 (s, 3H), 3.85 (s, 3H), 2.31 (s, 3H);  $^{13}\text{C NMR}$  (100 MHz,  $\text{CDCl}_3$ )  $\delta$  = 185.4, 165.7, 161.8, 157.0, 133.7, 119.7, 105.7, 98.7, 56.0, 55.7, 13.3; HRMS (ESI)  $m/z$  calcd for  $\text{C}_{11}\text{H}_{14}\text{NO}_4\text{S}^+$  ( $\text{M}+\text{H}$ ) $^+$  256.0638, found 256.0635.

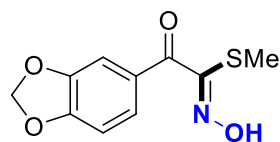

methyl (Z)-2-(benzo[d][1,3]dioxol-5-yl)-*N*-hydroxy-2-oxoethanimidothioate (**4l**):

Yield: 71% (50.8 mg); white solid, mp: 142.7–145.5 °C;  $^1\text{H NMR}$  (400 MHz,  $\text{DMSO}-d_6$ )  $\delta$  = 12.27 (s, 1H), 7.52 (d,  $J$  = 8.4 Hz, 1H), 7.38 (s, 1H), 7.09 (d,  $J$  = 8.0 Hz, 1H), 6.18 (s, 2H), 2.18 (s,

3H);  $^{13}\text{C}$  NMR (100 MHz,  $\text{DMSO-}d_6$ )  $\delta$  = 185.1, 152.9, 151.6, 148.1, 130.0, 128.2, 108.3, 108.2, 102.6, 12.5; HRMS (ESI)  $m/z$  calcd for  $\text{C}_{10}\text{H}_{10}\text{NO}_4\text{S}^+$  ( $\text{M}+\text{H}$ ) $^+$  240.0325, found 240.0320.

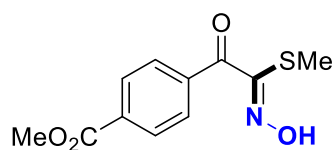

methyl (Z)-4-(2-(hydroxyimino)-2-(methylthio)acetyl)benzoate (**4m**):

Yield: 80% (60.6 mg); light yellow solid; mp: 97.9–100.1°C;  $^1\text{H}$  NMR (400 MHz,  $\text{DMSO-}d_6$ )  $\delta$  = 12.71 (s, 1H), 8.10 (d,  $J$  = 8.4 Hz, 2H), 8.00 (d,  $J$  = 8.8 Hz, 2H), 3.89 (s, 3H), 2.33 (s, 3H);  $^{13}\text{C}$  NMR (100 MHz,  $\text{DMSO-}d_6$ )  $\delta$  = 187.0, 165.5, 152.0, 139.6, 133.7, 130.4, 129.3, 52.6, 12.8; HRMS (ESI)  $m/z$  calcd for  $\text{C}_{11}\text{H}_{12}\text{NO}_4\text{S}^+$  ( $\text{M}+\text{H}$ ) $^+$  254.0482, found 254.0481.

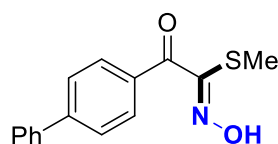

methyl (Z)-2-([1,1'-biphenyl]-4-yl)-*N*-hydroxy-2-oxoethanimidothioate (**4n**):

Yield: 66% (53.5 mg); light yellow solid; mp: 203.1–206.3°C;  $^1\text{H}$  NMR (600 MHz,  $\text{CDCl}_3$ )  $\delta$  = 9.34 (s, 1H), 8.06 (d,  $J$  = 8.4 Hz, 2H), 7.68 (d,  $J$  = 8.4 Hz, 2H), 7.61 (d,  $J$  = 7.2 Hz, 2H), 7.46 (t,  $J$  = 7.2 Hz, 2H), 7.41 (t,  $J$  = 7.2 Hz, 1H), 2.28 (s, 3H);  $^{13}\text{C}$  NMR (150 MHz,  $\text{CDCl}_3$ )  $\delta$  = 186.2, 154.7, 147.1, 139.3, 133.9, 131.0, 128.9, 128.5, 127.3, 127.2(6), 13.3. The data are in agreement with those previously reported in the literature.<sup>1</sup>

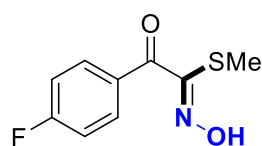

methyl (Z)-2-(4-fluorophenyl)-*N*-hydroxy-2-oxoethanimidothioate (**4o**):

Yield: 73% (46.5 mg); light yellow solid; mp: 65.8–67.3°C;  $^1\text{H}$  NMR (600 MHz,  $\text{CDCl}_3$ )  $\delta$  = 9.37 (s, 1H), 8.04 – 8.01 (m, 2H), 7.15 (t,  $J$  = 8.4 Hz, 2H), 2.28 (s, 3H);  $^{13}\text{C}$  NMR (150 MHz,  $\text{CDCl}_3$ )  $\delta$  = 185.1, 166.3 (d,  $J$  = 257.0 Hz), 154.5, 133.3 (d,  $J$  = 9.6 Hz), 131.6, 116.0 (d,  $J$  = 22.1 Hz), 13.3; HRMS (ESI)  $m/z$  calcd for  $\text{C}_9\text{H}_9\text{FNO}_2\text{S}^+$  ( $\text{M}+\text{H}$ ) $^+$  214.0333, found 214.0332.

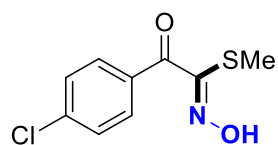



methyl (Z)-2-(4-chlorophenyl)-*N*-hydroxy-2-oxoethanimidothioate (**4p**):

Yield: 70% (48.1 mg); light yellow solid; mp: 60.2–62.5°C;  $^1\text{H}$  NMR (600 MHz,  $\text{CDCl}_3$ )  $\delta$  = 9.23 (s, 1H), 7.92 (d,  $J$  = 8.4 Hz, 2H), 7.45 (d,  $J$  = 8.4 Hz, 2H), 2.30 (s, 3H);  $^{13}\text{C}$  NMR (150 MHz,  $\text{CDCl}_3$ )  $\delta$  = 185.4, 154.5, 141.2, 133.6, 131.7, 129.1, 13.3 The data are in agreement with those previously reported in the literature.<sup>1</sup>

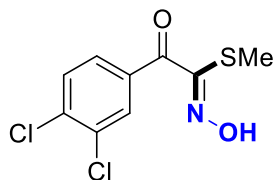

methyl (Z)-2-(3,4-dichlorophenyl)-*N*-hydroxy-2-oxoethanimidothioate (**4q**):

Yield: 58% (45.6 mg); light yellow solid; mp: 99.6–102.3°C;  $^1\text{H}$  NMR (400 MHz,  $\text{DMSO-}d_6$ )  $\delta$  = 12.81 (s, 1H), 8.06 (s, 1H), 7.84 (d,  $J$  = 1.2 Hz, 2H), 2.35 (s, 3H);  $^{13}\text{C}$  NMR (100 MHz,  $\text{DMSO-}d_6$ )  $\delta$  = 185.1, 152.0, 136.7, 136.2, 132.0, 131.4, 131.0, 130.1, 12.9; HRMS (ESI)  $m/z$  calcd for  $\text{C}_9\text{H}_8\text{Cl}_2\text{NO}_2\text{S}^+$  ( $\text{M}+\text{H}$ )<sup>+</sup> 263.9647, found 263.9647.

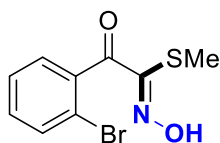

methyl (Z)-2-(2-bromophenyl)-*N*-hydroxy-2-oxoethanimidothioate (**4r**):

Yield: 71% (58.0 mg); light yellow solid; mp: 118.3–123.6°C;  $^1\text{H}$  NMR (400 MHz,  $\text{DMSO-}d_6$ )  $\delta$  = 12.91 (s, 1H), 7.53 (s, 1H), 7.38 – 7.32 (m, 3H), 2.42 (s, 3H);  $^{13}\text{C}$  NMR (100 MHz,  $\text{DMSO-}d_6$ )  $\delta$  = 189.7, 152.6, 140.6, 132.6, 132.1, 129.8, 127.6, 119.1, 13.3; HRMS (ESI)  $m/z$  calcd for  $\text{C}_9\text{H}_9\text{BrNO}_2\text{S}^+$  ( $\text{M}+\text{H}$ )<sup>+</sup> 273.9532, found 273.9532.

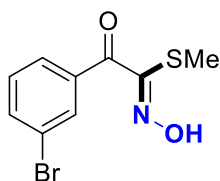

methyl (Z)-2-(3-bromophenyl)-*N*-hydroxy-2-oxoethanimidothioate (**4s**):

Yield: 75% (61.2 mg); light yellow oil;  $^1\text{H}$  NMR (400 MHz,  $\text{CDCl}_3$ )  $\delta$  = 9.22 (s, 1H), 8.10 (d,  $J$  = 1.6 Hz, 1H), 7.89 (d,  $J$  = 7.6 Hz, 1H), 7.76 – 7.73 (m, 1H), 7.36 (t,  $J$  = 8.0 Hz, 1H), 2.31 (s, 3H);  $^{13}\text{C}$  NMR (100 MHz,  $\text{CDCl}_3$ )  $\delta$  = 185.3, 154.3, 137.2, 137.0, 133.0, 130.2, 129.1, 122.9, 13.4; HRMS (ESI)  $m/z$  calcd for  $\text{C}_9\text{H}_9\text{BrNO}_2\text{S}^+$  ( $\text{M}+\text{H}$ )<sup>+</sup> 273.9532, found 273.9531.

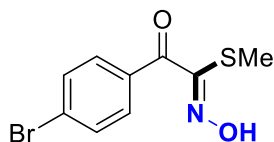

methyl (Z)-2-(4-bromophenyl)-*N*-hydroxy-2-oxoethanimidothioate (**4t**):

Yield: 70% (57.2 mg); light yellow solid; mp: 88.3–90.6°C;  $^1\text{H}$  NMR (600 MHz,  $\text{CDCl}_3$ )  $\delta$  = 8.92 (s, 1H), 7.85 (d,  $J$  = 8.4 Hz, 2H), 7.63 (d,  $J$  = 8.4 Hz, 2H), 2.30 (s, 3H);  $^{13}\text{C}$  NMR (150 MHz,  $\text{CDCl}_3$ )  $\delta$  = 185.6, 154.5, 134.1, 132.1, 131.8, 130.1, 13.4; HRMS (ESI)  $m/z$  calcd for  $\text{C}_9\text{H}_9\text{BrNO}_2\text{S}^+$  ( $\text{M}+\text{H}$ ) $^+$  273.9532, found 273.9536.

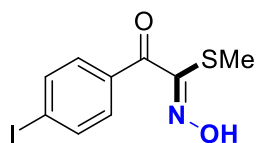

methyl (Z)-*N*-hydroxy-2-(4-iodophenyl)-2-oxoethanimidothioate (**4u**):

Yield: 56% (53.8 mg); light yellow solid; mp: 108.7–121.3°C;  $^1\text{H}$  NMR (400 MHz,  $\text{DMSO}-d_6$ )  $\delta$  = 12.55 (s, 1H), 7.97 (d,  $J$  = 7.6 Hz, 2H), 7.65 (d,  $J$  = 7.2 Hz, 2H), 2.27 (s, 3H);  $^{13}\text{C}$  NMR (100 MHz,  $\text{DMSO}-d_6$ )  $\delta$  = 187.1, 152.2, 138.2, 135.5, 132.1, 103.8, 13.2; HRMS (ESI)  $m/z$  calcd for  $\text{C}_9\text{H}_9\text{INO}_2\text{S}^+$  ( $\text{M}+\text{H}$ ) $^+$  321.9393, found 321.9395.

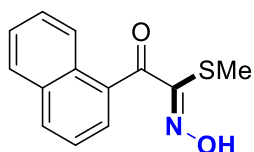

methyl (Z)-*N*-hydroxy-2-(naphthalen-1-yl)-2-oxoethanimidothioate (**4v**):

Yield: 79% (57.8 mg); light yellow solid; mp: 129.7–131.4°C;  $^1\text{H}$  NMR (400 MHz,  $\text{DMSO}-d_6$ )  $\delta$  = 12.59 (s, 1H), 8.39 (d,  $J$  = 8.4 Hz, 1H), 8.21 (d,  $J$  = 8.0 Hz, 1H), 8.06 (d,  $J$  = 8.0 Hz, 1H), 7.88 (d,  $J$  = 7.2 Hz, 1H), 7.70 – 7.61 (m, 3H), 2.45 (s, 3H);  $^{13}\text{C}$  NMR (100 MHz,  $\text{DMSO}-d_6$ )  $\delta$  = 189.8, 153.9, 134.2, 133.3, 133.2, 131.3, 130.1, 128.8, 128.3, 126.7, 124.8, 124.7, 13.0; HRMS (ESI)  $m/z$  calcd for  $\text{C}_{13}\text{H}_{12}\text{NO}_2\text{S}^+$  ( $\text{M}+\text{H}$ ) $^+$  246.0583, found 246.0582.

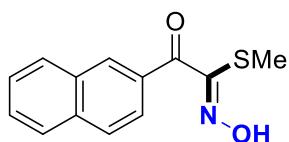

methyl (Z)-*N*-hydroxy-2-(naphthalen-2-yl)-2-oxoethanimidothioate (**4w**):

Yield: 76% (55.6 mg); light yellow oil;  $^1\text{H}$  NMR (600 MHz,  $\text{DMSO}-d_6$ )  $\delta$  = 12.51 (s, 1H), 8.56 (s, 1H), 8.17 (d,  $J$  = 8.4 Hz, 1H), 8.07 (d,  $J$  = 8.4 Hz, 1H), 8.02 (d,  $J$  = 8.4 Hz, 1H), 7.97 (d,  $J$  = 9.0 Hz, 1H), 7.71 (t,  $J$  = 7.8 Hz, 1H), 7.64 (t,  $J$  = 7.8 Hz, 1H), 2.29 (s, 3H);  $^{13}\text{C}$  NMR (150 MHz,

DMSO-*d*<sub>6</sub>)  $\delta$  = 187.2, 152.0, 135.5, 133.3, 133.1, 131.9, 129.9, 129.4, 128.7, 127.8, 127.3, 124.4, 12.7; HRMS (ESI) *m/z* calcd for C<sub>13</sub>H<sub>12</sub>NO<sub>2</sub>S<sup>+</sup> (M+H)<sup>+</sup> 246.0583, found 246.0585.

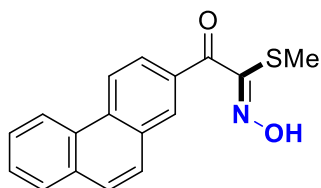

methyl (Z)-*N*-hydroxy-2-oxo-2-(phenanthren-2-yl)ethanimidothioate (**4x**):

Yield: 59% (52.2 mg); white solid; mp: 202.8–205.4°C; <sup>1</sup>H NMR (400 MHz, DMSO-*d*<sub>6</sub>)  $\delta$  = 12.59 (s, 1H), 8.99 (d, *J* = 8.8 Hz, 1H), 8.91 – 8.89 (m, 1H), 8.59 (s, 1H), 8.16 (d, *J* = 8.8 Hz, 1H), 8.06 – 8.03 (m, 2H), 7.95 (d, *J* = 8.8 Hz, 1H), 7.77 – 7.75 (m, 2H), 2.33 (s, 3H); <sup>13</sup>C NMR (100 MHz, DMSO-*d*<sub>6</sub>)  $\delta$  = 187.0, 152.1, 133.7, 133.4, 132.8, 132.4, 130.9, 129.1, 128.7, 128.4, 128.1, 127.5, 127.3, 126.4, 123.9, 123.8, 12.8. The data are in agreement with those previously reported in the literature.<sup>1</sup>

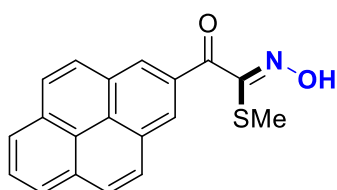

methyl (Z)-*N*-hydroxy-2-oxo-2-(pyren-2-yl)ethanimidothioate (**4y**):

Yield: 62% (59.2 mg); white solid; mp: 225.2–227.6°C; <sup>1</sup>H NMR (600 MHz, DMSO-*d*<sub>6</sub>)  $\delta$  = 12.61 (s, 1H), 8.70 (d, *J* = 9.0 Hz, 1H), 8.43 – 8.33 (m, 6H), 8.25 (d, *J* = 9.0 Hz, 1H), 8.16 (t, *J* = 7.8 Hz, 1H), 2.52 (s, 3H); <sup>13</sup>C NMR (150 MHz, DMSO-*d*<sub>6</sub>)  $\delta$  = 190.0, 154.2, 133.8, 130.9, 130.6, 130.1, 130.0, 129.9, 129.6, 129.3, 127.2, 127.0, 126.6, 124.1, 123.9, 123.8, 123.3, 13.1; HRMS (ESI) *m/z* calcd for C<sub>19</sub>H<sub>14</sub>NO<sub>2</sub>S<sup>+</sup> (M+H)<sup>+</sup> 320.0740, found 320.0738.

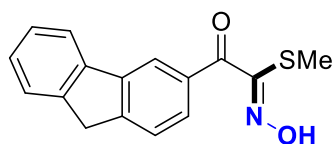

methyl (Z)-2-(9H-fluoren-3-yl)-*N*-hydroxy-2-oxoethanimidothioate (**4z**):

Yield: 61% (51.5 mg); white solid; mp: 142.1–144.0°C; <sup>1</sup>H NMR (600 MHz, CDCl<sub>3</sub>)  $\delta$  = 8.83 (s, 1H), 8.17 (s, 1H), 8.05 (d, *J* = 7.8 Hz, 1H), 7.84 – 7.83 (m, 2H), 7.59 (d, *J* = 6.6 Hz, 1H), 7.43 – 7.39 (m, 2H), 3.94 (s, 2H), 2.29 (s, 3H); <sup>13</sup>C NMR (150 MHz, CDCl<sub>3</sub>)  $\delta$  = 186.3, 155.0, 148.0, 144.8, 143.4, 140.0, 133.6, 130.0, 128.5, 127.1, 127.0, 125.3, 121.2, 119.9, 36.8, 13.3; HRMS (ESI)

m/z calcd for C<sub>16</sub>H<sub>14</sub>NO<sub>2</sub>S<sup>+</sup> (M+H)<sup>+</sup> 284.0740, found 284.0739.

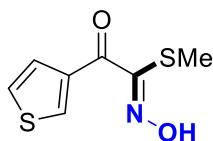

methyl (Z)-*N*-hydroxy-2-oxo-2-(thiophen-3-yl)ethanimidothioate (**4aa**):

Yield: 65% (39.1 mg); light yellow oil; <sup>1</sup>H NMR (600 MHz, CDCl<sub>3</sub>) δ = 9.00 (s, 1H), 8.25 (s, 1H), 7.64 (d, *J* = 4.8 Hz, 1H), 7.36 (s, 1H), 2.35 (s, 3H); <sup>13</sup>C NMR (150 MHz, CDCl<sub>3</sub>) δ = 179.7, 155.3, 140.0, 137.5, 127.7, 126.8, 13.5; HRMS (ESI) m/z calcd for C<sub>7</sub>H<sub>8</sub>NO<sub>2</sub>S<sub>2</sub><sup>+</sup> (M+H)<sup>+</sup> 201.9991, found 201.9992.

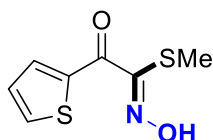

methyl (Z)-*N*-hydroxy-2-oxo-2-(thiophen-2-yl)ethanimidothioate (**4ab**):

Yield: 68% (40.9 mg); light yellow oil; <sup>1</sup>H NMR (400 MHz, CDCl<sub>3</sub>) δ = 9.40 (s, 1H), 7.89 (s, 1H), 7.79 (d, *J* = 4.0 Hz, 1H), 7.17 (s, 1H), 2.38 (s, 3H); <sup>13</sup>C NMR (100 MHz, CDCl<sub>3</sub>) δ = 178.2, 154.6, 141.4, 137.1, 137.0, 128.6, 13.6; HRMS (ESI) m/z calcd for C<sub>7</sub>H<sub>8</sub>NO<sub>2</sub>S<sub>2</sub><sup>+</sup> (M+H)<sup>+</sup> 201.9991, found 201.9991.

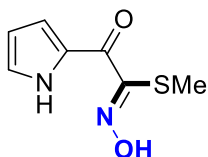

methyl (Z)-*N*-hydroxy-2-oxo-2-(1H-pyrrol-2-yl)ethanimidothioate (**4ac**):

Yield: 48% (26.5 mg); light yellow oil; <sup>1</sup>H NMR (400 MHz, CDCl<sub>3</sub>) δ = 10.03 (s, 1H), 9.30 (s, 1H), 7.04 – 7.02 (m, 1H), 6.94 – 6.92 (m, 1H), 6.25 – 6.23 (m, 1H), 2.32 (s, 3H); <sup>13</sup>C NMR (100 MHz, CDCl<sub>3</sub>) δ 174.7, 154.8, 130.6, 128.0, 122.8, 112.0, 13.5. HRMS (ESI) m/z calcd for C<sub>7</sub>H<sub>8</sub>N<sub>2</sub>O<sub>2</sub>SNa<sup>+</sup> (M+Na)<sup>+</sup> 207.0199, found 207.0199.

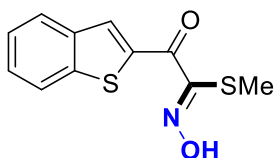

methyl (Z)-2-(benzo[b]thiophen-2-yl)-*N*-hydroxy-2-oxoethanimidothioate (**4ad**):

Yield: 62% (46.5 mg); white solid; mp: 138.7–141.2°C; <sup>1</sup>H NMR (400 MHz, CDCl<sub>3</sub>) δ = 8.57 (s, 1H), 8.08 (s, 1H), 7.82 (dd, *J* = 14.4, 8.0 Hz, 2H), 7.43 (t, *J* = 7.6 Hz, 1H), 7.34 (t, *J* = 7.6 Hz, 1H),

2.33 (s, 3H);  $^{13}\text{C}$  NMR (100 MHz,  $\text{CDCl}_3$ )  $\delta$  = 179.8, 154.4, 143.7, 141.2, 138.8, 135.0, 128.3, 126.7, 125.3, 122.9, 13.7. The data are in agreement with those previously reported in the literature.<sup>1</sup>

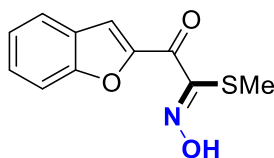

methyl (Z)-2-(benzofuran-2-yl)-*N*-hydroxy-2-oxoethanimidodithioate (**4ae**):

Yield: 57% (40.1 mg); light yellow solid; mp: 179.3–181.9°C;  $^1\text{H}$  NMR (400 MHz,  $\text{CDCl}_3$ )  $\delta$  = 8.80 (s, 1H), 7.64 (d,  $J$  = 10.8 Hz, 2H), 7.53 (d,  $J$  = 8.8 Hz, 1H), 7.44 (t,  $J$  = 7.6 Hz, 1H), 7.25 (t,  $J$  = 7.6 Hz, 1H), 2.35 (s, 3H);  $^{13}\text{C}$  NMR (100 MHz,  $\text{CDCl}_3$ )  $\delta$  = 175.1, 156.6, 154.3, 150.7, 129.5, 126.8, 124.2, 123.9, 120.3, 112.6, 13.7. The data are in agreement with those previously reported in the literature.<sup>1</sup>

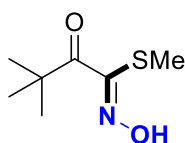

methyl (Z)-*N*-hydroxy-3,3-dimethyl-2-oxobutananimidodithioate (**4af**):

Yield: 46% (24.1 mg); light yellow oil;  $^1\text{H}$  NMR (400 MHz,  $\text{CDCl}_3$ )  $\delta$  = 8.17 (s, 1H), 2.18 (s, 3H), 1.20 (s, 9H);  $^{13}\text{C}$  NMR (100 MHz,  $\text{CDCl}_3$ )  $\delta$  = 201.4, 154.3, 45.0, 26.4, 13.9; HRMS (ESI)  $m/z$  calcd for  $\text{C}_7\text{H}_{17}\text{N}_2\text{O}_2\text{S}^+$  ( $\text{M}+\text{NH}_4$ )<sup>+</sup> 193.1005, found 193.1008.

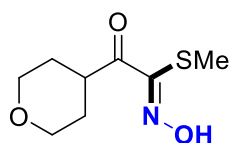

methyl (Z)-*N*-hydroxy-2-oxo-2-(tetrahydro-2*H*-pyran-4-yl)ethanimidodithioate (**4ag**):

Yield: 33% (20.1 mg); light yellow oil;  $^1\text{H}$  NMR (400 MHz,  $\text{CDCl}_3$ )  $\delta$  = 8.80 (s, 1H), 3.96 (d,  $J$  = 11.6 Hz, 2H), 3.44–3.34 (m, 3H), 2.39 (s, 3H), 1.71–1.65 (m, 4H);  $^{13}\text{C}$  NMR (100 MHz,  $\text{CDCl}_3$ )  $\delta$  = 196.5, 153.8, 67.1, 44.0, 28.1, 14.3; HRMS (ESI)  $m/z$  calcd for  $\text{C}_8\text{H}_{14}\text{NO}_3\text{S}^+$  ( $\text{M}+\text{H}$ )<sup>+</sup> 204.0689, found 204.0690.

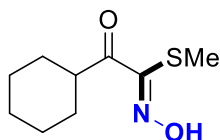

methyl (Z)-2-cyclohexyl-N-hydroxy-2-oxoethanimidothioate (**4ah**):

Yield: 50% (30.1 mg); light yellow oil;  $^1\text{H}$  NMR (400 MHz,  $\text{CDCl}_3$ )  $\delta$  = 8.39 (s, 1H), 3.09 – 3.03 (m, 1H), 2.35 (s, 3H), 1.81 – 1.72 (m, 4H), 1.34 – 1.11 (m, 6H);  $^{13}\text{C}$  NMR (100 MHz,  $\text{CDCl}_3$ )  $\delta$  = 198.5, 154.8, 47.3, 28.3, 25.8, 25.5, 14.2; HRMS (ESI)  $m/z$  calcd for  $\text{C}_9\text{H}_{16}\text{NO}_2\text{S}^+$  ( $\text{M}+\text{H}$ ) $^+$  202.0896, found 202.0898.

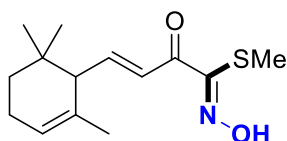

methyl (1Z,3E)-N-hydroxy-2-oxo-4-(2,6,6-trimethylcyclohex-2-en-1-yl)but-3-enimidothioate (**4ai**):

Yield: 61% (48.7 mg); light yellow oil;  $^1\text{H}$  NMR (600 MHz,  $\text{CDCl}_3$ )  $\delta$  = 8.93 (s, 1H), 6.93 – 6.88 (m, 1H), 6.57 (d,  $J$  = 15.6 Hz, 1H), 5.52 (s, 1H), 2.44 (s, 3H), 2.35 (d,  $J$  = 10.2 Hz, 1H), 2.05 (s, 2H), 1.56 (s, 3H), 1.49 – 1.44 (m, 1H), 1.23 – 1.20 (m, 1H), 0.93 (s, 3H), 0.85 (s, 3H);  $^{13}\text{C}$  NMR (150 MHz,  $\text{CDCl}_3$ )  $\delta$  = 184.6, 154.9, 153.7, 131.3, 127.9, 123.1, 54.5, 32.7, 31.0, 27.7, 26.8, 23.0, 22.8, 14.0; HRMS (ESI)  $m/z$  calcd for  $\text{C}_{14}\text{H}_{21}\text{NO}_2\text{SK}^+$  ( $\text{M}+\text{K}$ ) $^+$  306.0925, found 306.0924.

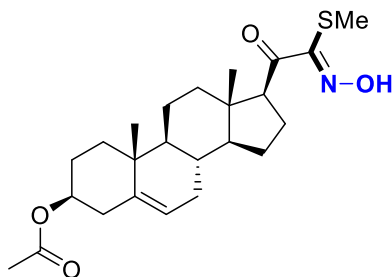

(3S,8S,9S,10R,13S,14S,17S)-17-((Z)-2-(hydroxyimino)-2-(methylthio)acetyl)-10,13-dimethyl-2,3,4,7,8,9,10,11,12,13,14,15,16,17-tetradecahydro-1H-cyclopenta[a]phenanthren-3-yl acetate (**4aj**):

Yield: 55% (71.1 mg); light yellow solid; mp: 181.4–185.6°C;  $^1\text{H}$  NMR (400 MHz,  $\text{CDCl}_3$ )  $\delta$  = 8.82 (s, 1H), 5.31 (d,  $J$  = 4.8 Hz, 1H), 4.58 – 4.50 (m, 1H), 3.37 (t,  $J$  = 8.8 Hz, 1H), 2.41 (s, 3H), 2.29 – 2.14 (m, 3H), 1.97 (s, 3H), 1.80 – 1.72 (m, 3H), 1.65 – 1.32 (m, 9H), 1.23–1.02 (m, 4H), 0.94 (s, 3H), 0.59 (s, 3H);  $^{13}\text{C}$  NMR (100 MHz,  $\text{CDCl}_3$ )  $\delta$  = 196.8, 171.0, 155.2, 139.6, 122.3, 74.0, 58.5, 56.9, 49.9, 45.4, 38.8, 38.0, 37.0, 36.6, 31.9, 31.7, 27.7, 24.6, 22.8, 21.4, 21.0, 19.3, 14.3, 13.9. HRMS (ESI)  $m/z$  calcd for  $\text{C}_{24}\text{H}_{35}\text{NO}_4\text{SNa}^+$  ( $\text{M}+\text{Na}$ ) $^+$  456.2179, found 456.2173.

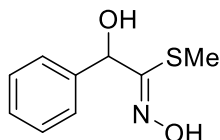

methyl (Z)-N,2-dihydroxy-2-phenylethanimidothioate (**6a**):

Yield: 72% (28.4 mg); light yellow oil;  $^1\text{H NMR}$  (400 MHz,  $\text{CDCl}_3$ )  $\delta$  = 7.42 – 7.33 (m, 5H), 5.97 (s, 2H), 5.58 (s, 1H), 2.14 (s, 3H);  $^{13}\text{C NMR}$  (100 MHz,  $\text{CDCl}_3$ )  $\delta$  = 157.9, 138.9, 128.8, 128.5, 126.8, 73.8, 12.8. HRMS (ESI)  $m/z$  calcd for  $\text{C}_9\text{H}_{12}\text{NO}_2\text{S}^+$  ( $\text{M}+\text{H}$ ) $^+$  198.0583; found 198.0583.

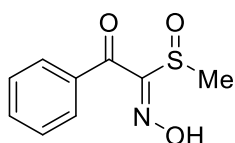

(Z)-2-(hydroxyimino)-2-(methylsulfinyl)-1-phenylethan-1-one (**6b**):

Yield: 80% (33.6 mg); white solid; mp: 125.1–127.8°C;  $^1\text{H NMR}$  (400 MHz,  $\text{DMSO}-d_6$ )  $\delta$  = 13.31 (s, 1H), 7.98 – 7.61 (m, 5H), 3.06 (s, 3H). The data are in agreement with those previously reported in the literature.<sup>2</sup>

## References:

- (1) Dighe, S. U.; Mukhopadhyay, S.; Priyanka, K.; Batra, S. Metal-Free Oxidative Nitration of  $\alpha$ -Carbon of Carbonyls Leads to One-Pot Synthesis of Thiohydroxamic Acids from Acetophenones. *Org. Lett.* **2016**, *18*, 4190-4193.
- (2) Otsuji, Y.; Tsujii, Y.; Yoshida, A.; Imoto, E. The Nitrosation of  $\beta$ -Keto Sulfoxides. *Bulletin of the Chemical Society of Japan* **1971**, *44*, 219-223.

## 6. Copies of $^1\text{H}$ NMR, $^{13}\text{C}$ NMR

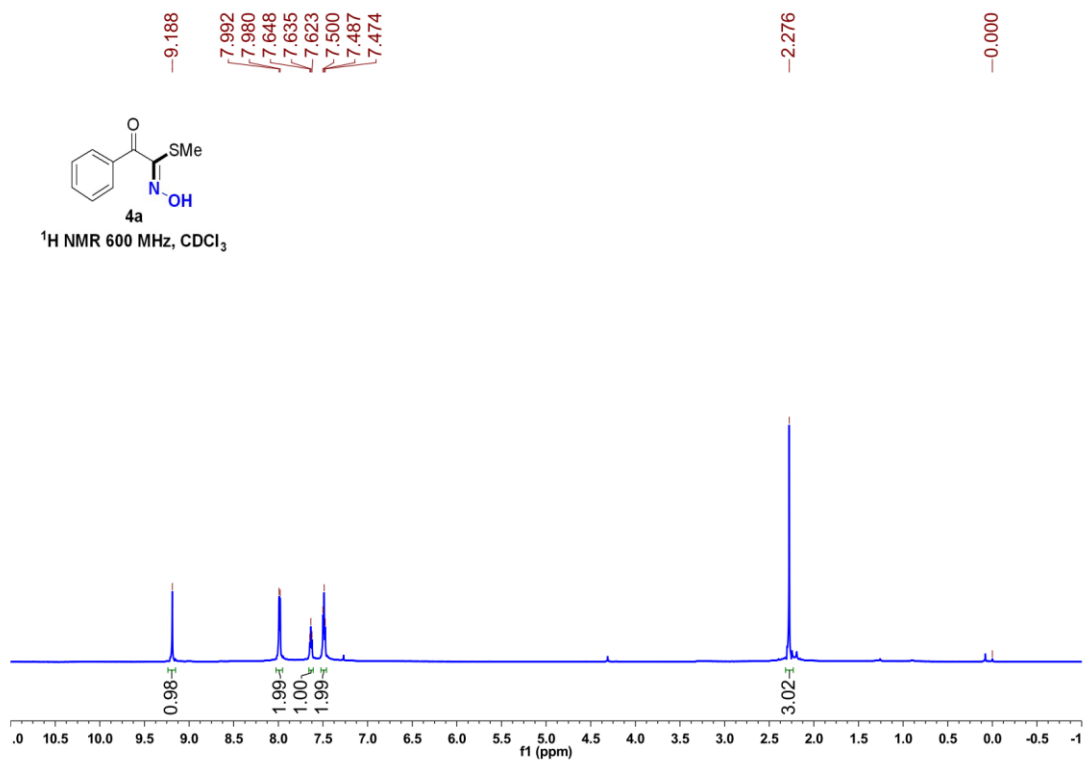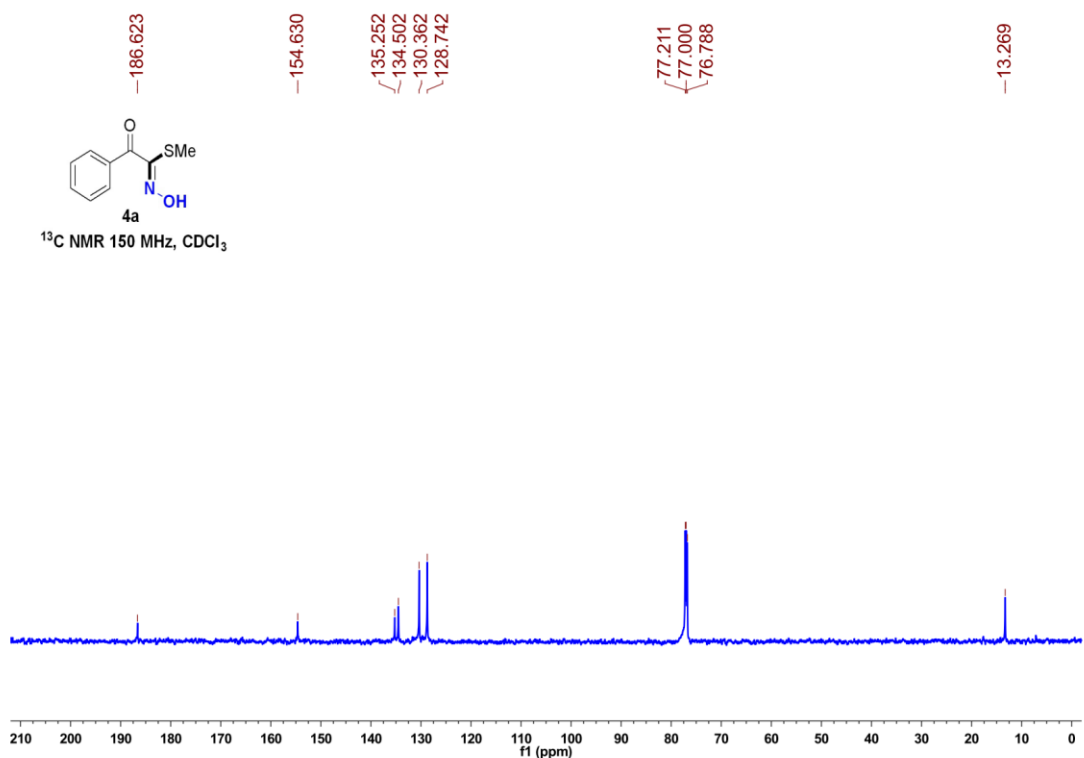



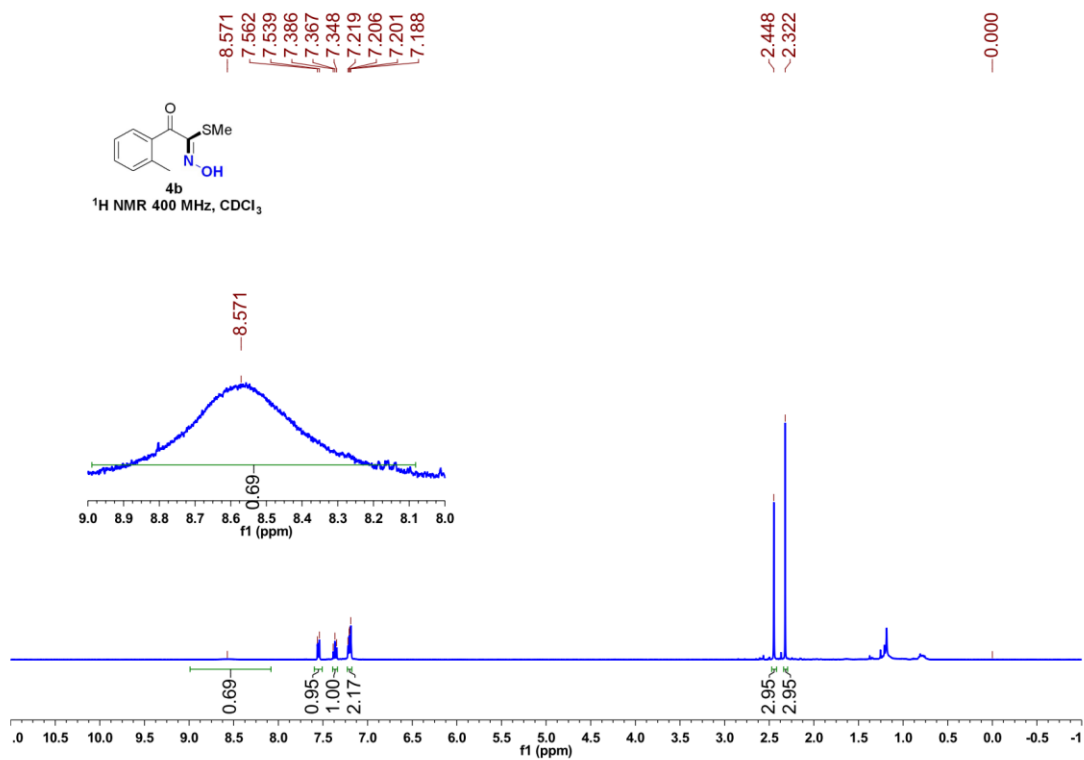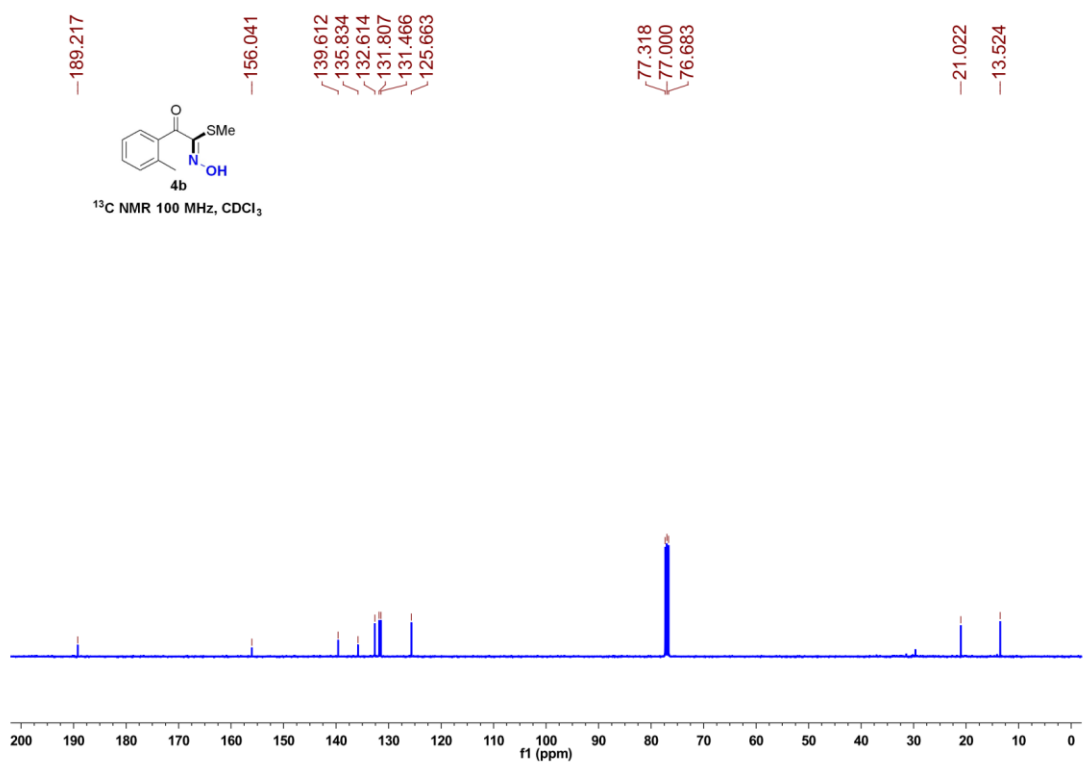

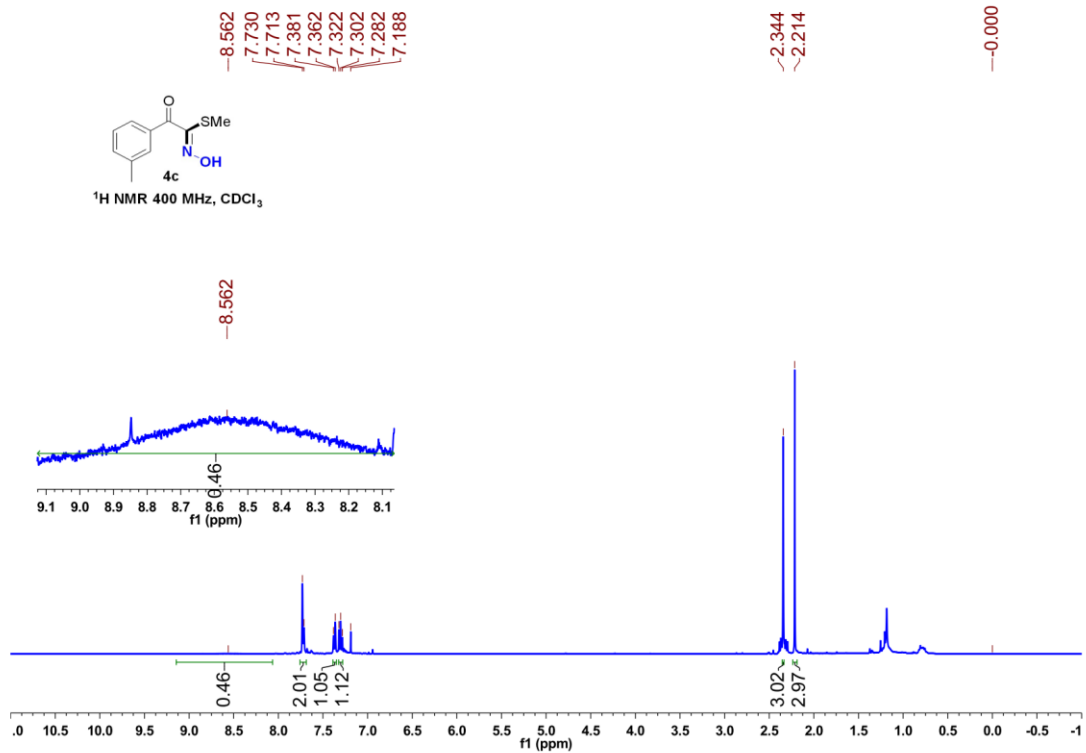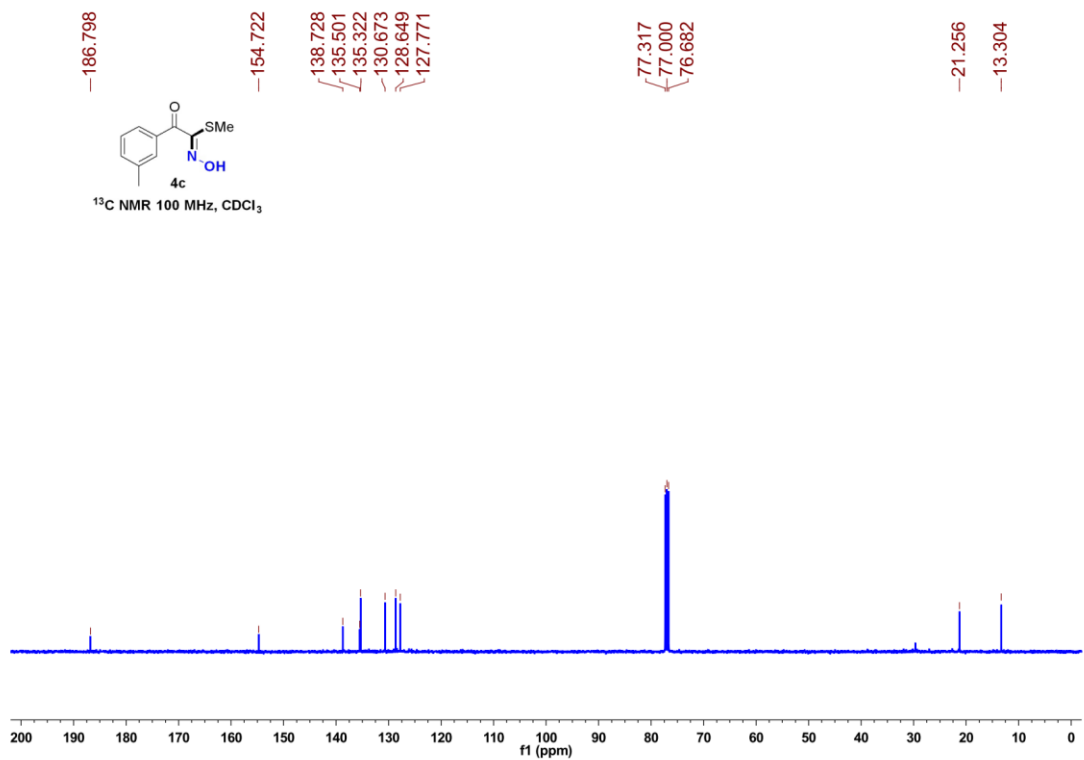

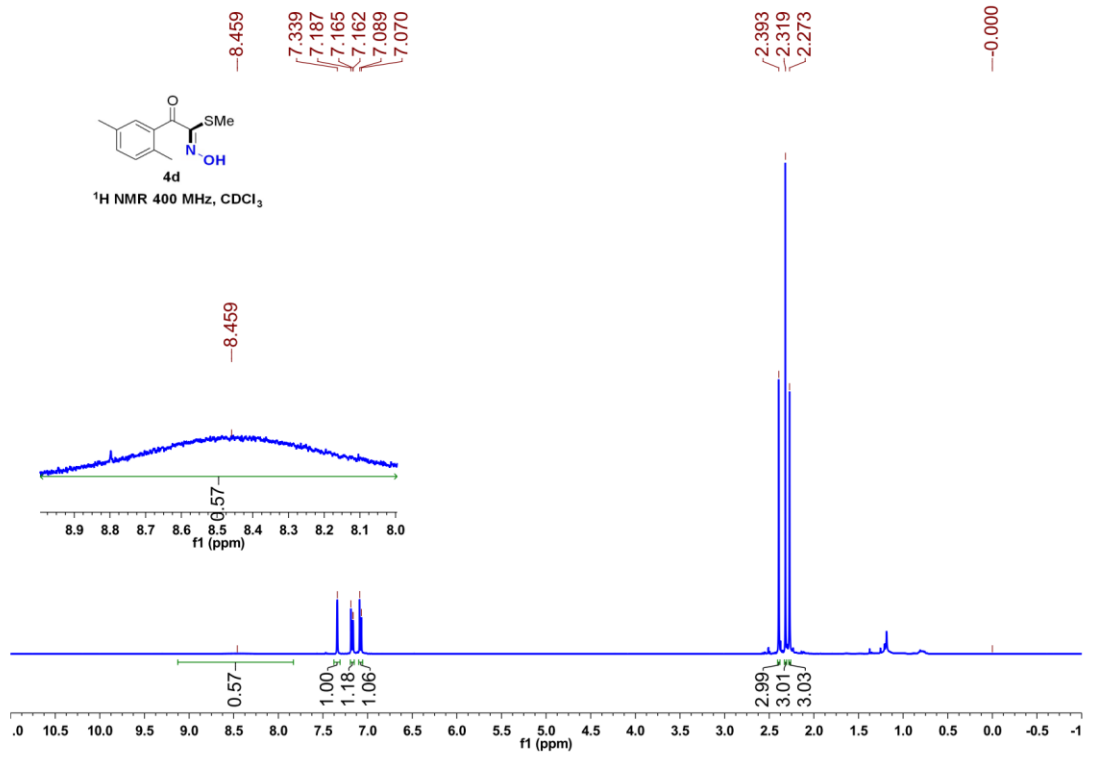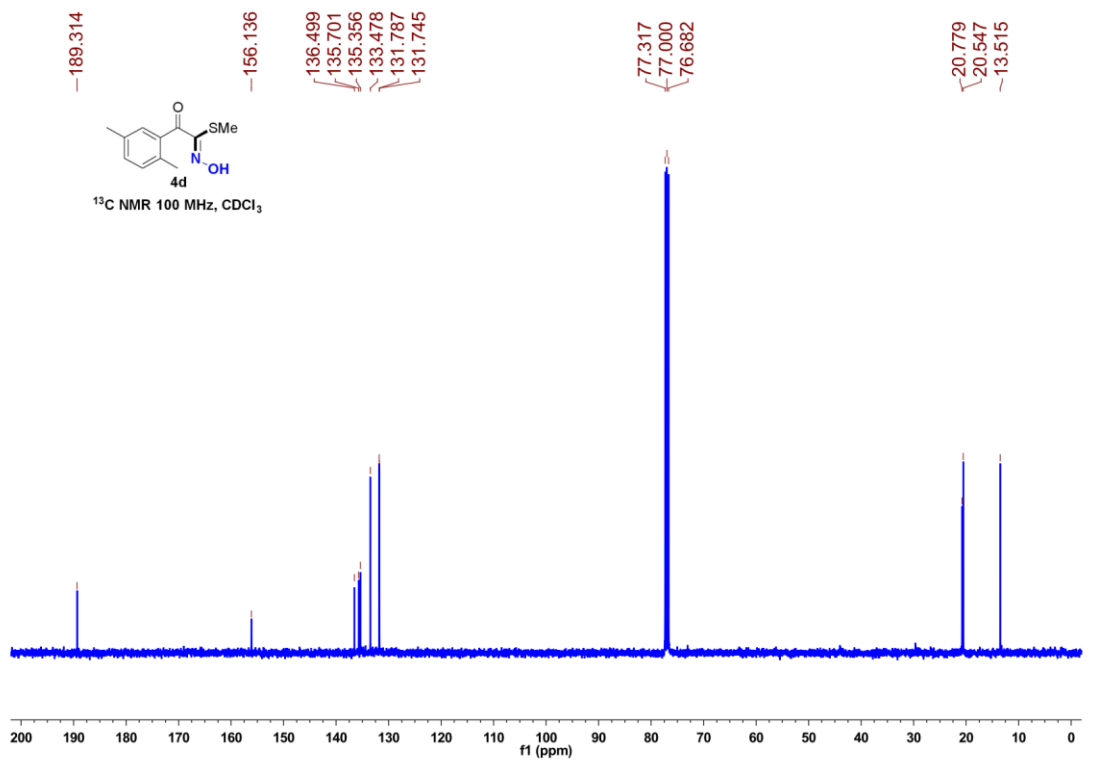

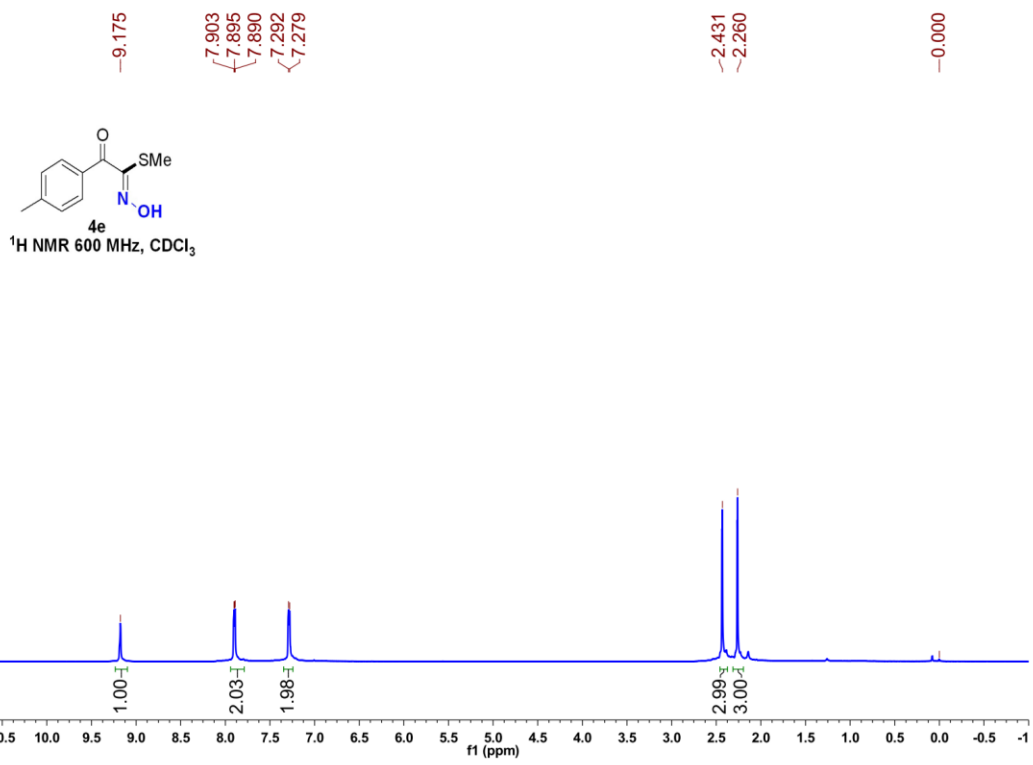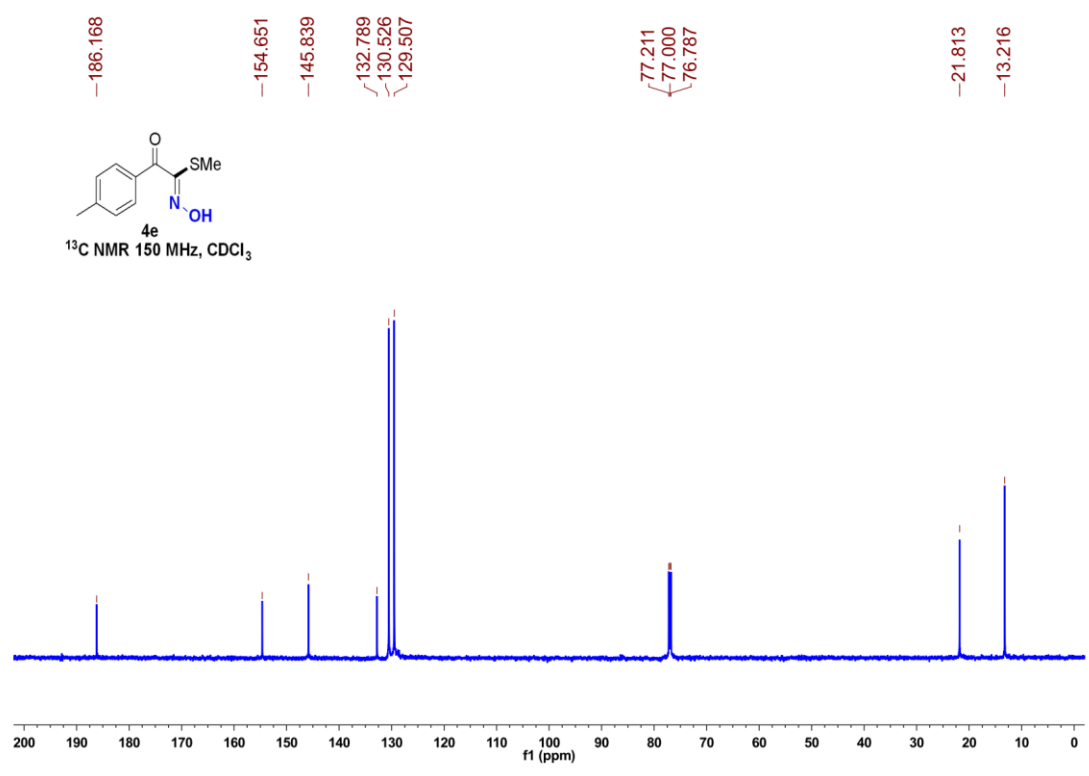

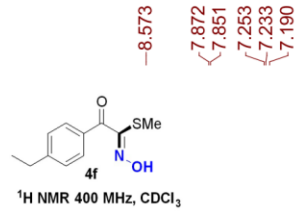

8.573  
7.872  
7.851  
7.253  
7.233  
7.190

2.682  
2.663  
2.644  
2.624  
2.207

1.212  
1.193  
1.174

0.000

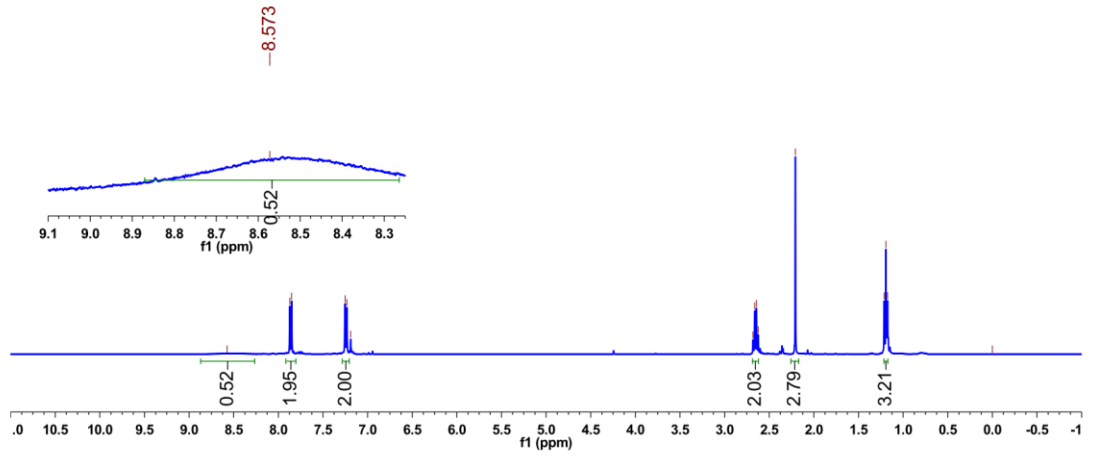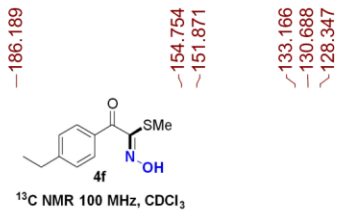

186.189

154.754  
151.871

133.166  
130.688  
128.347

77.317  
77.000  
76.682

29.078

15.006  
13.276

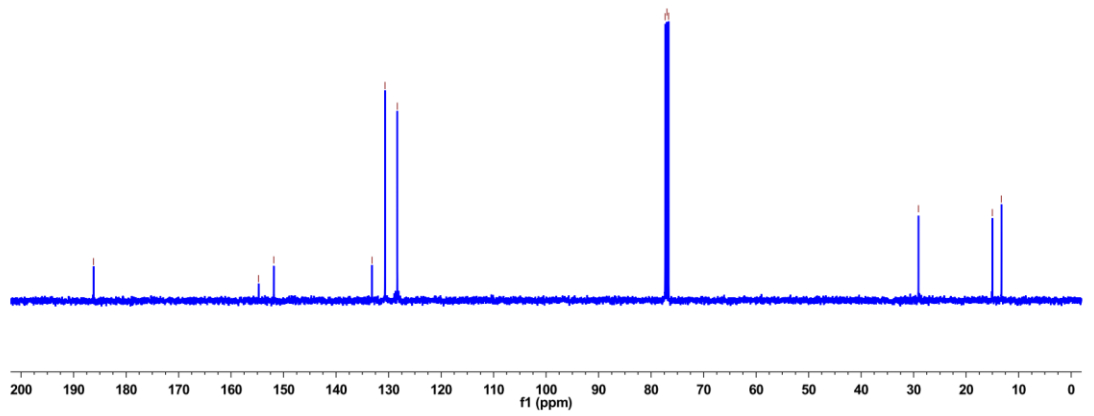

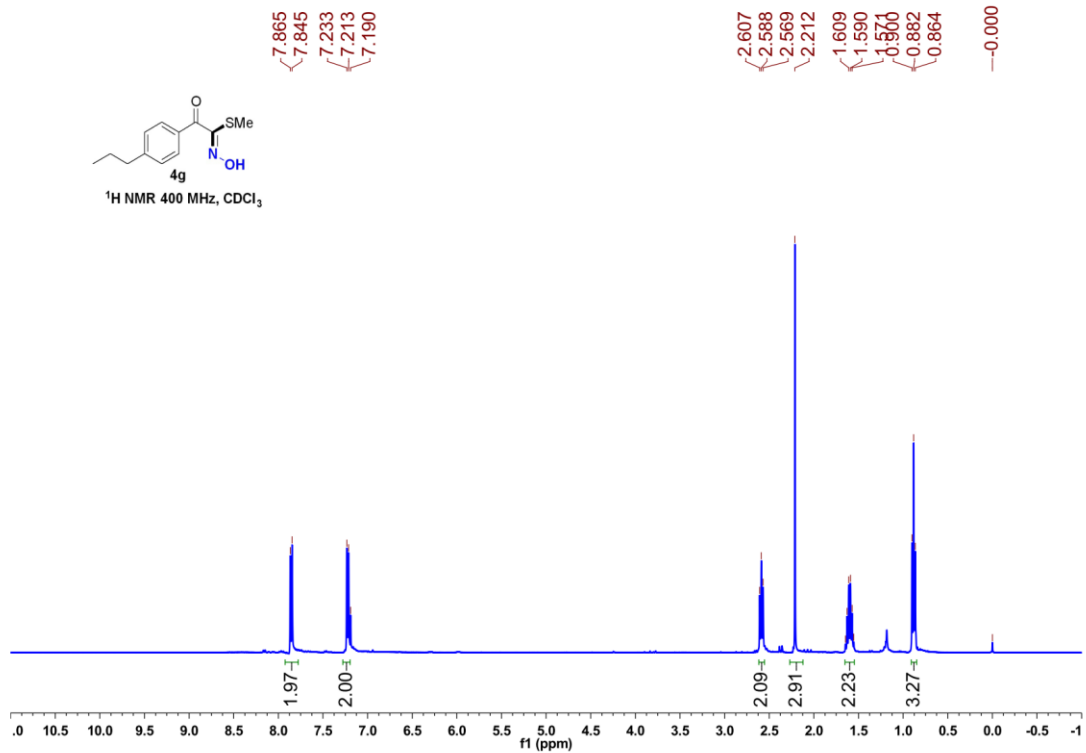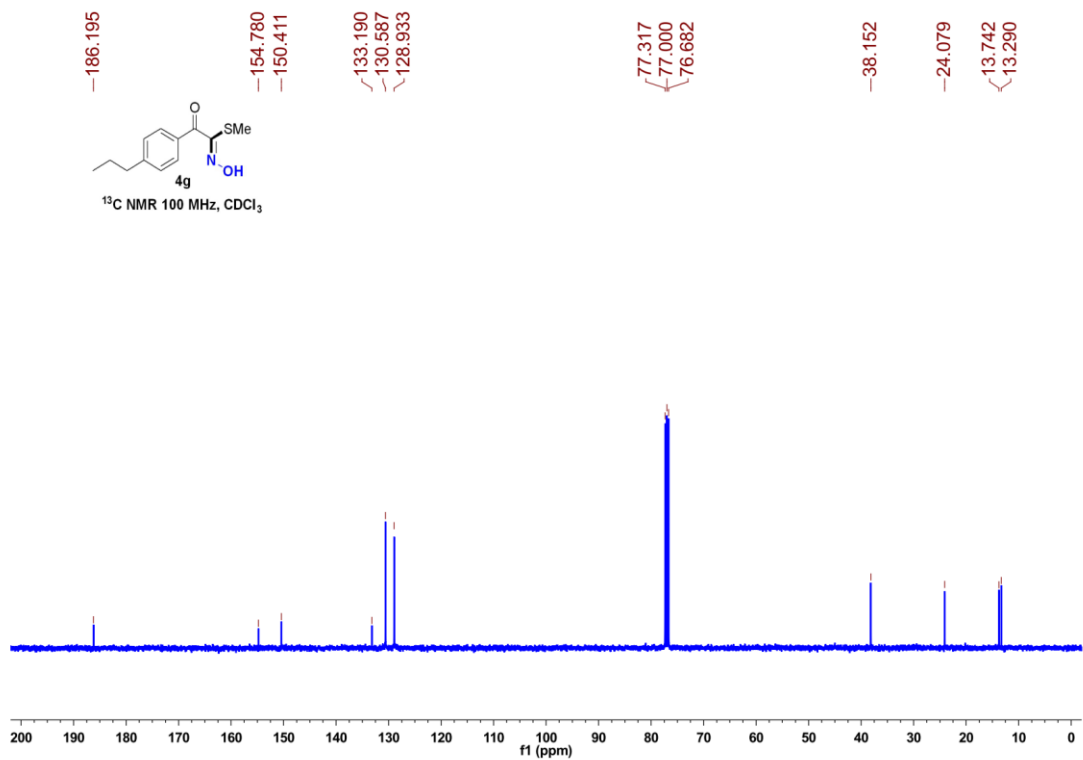

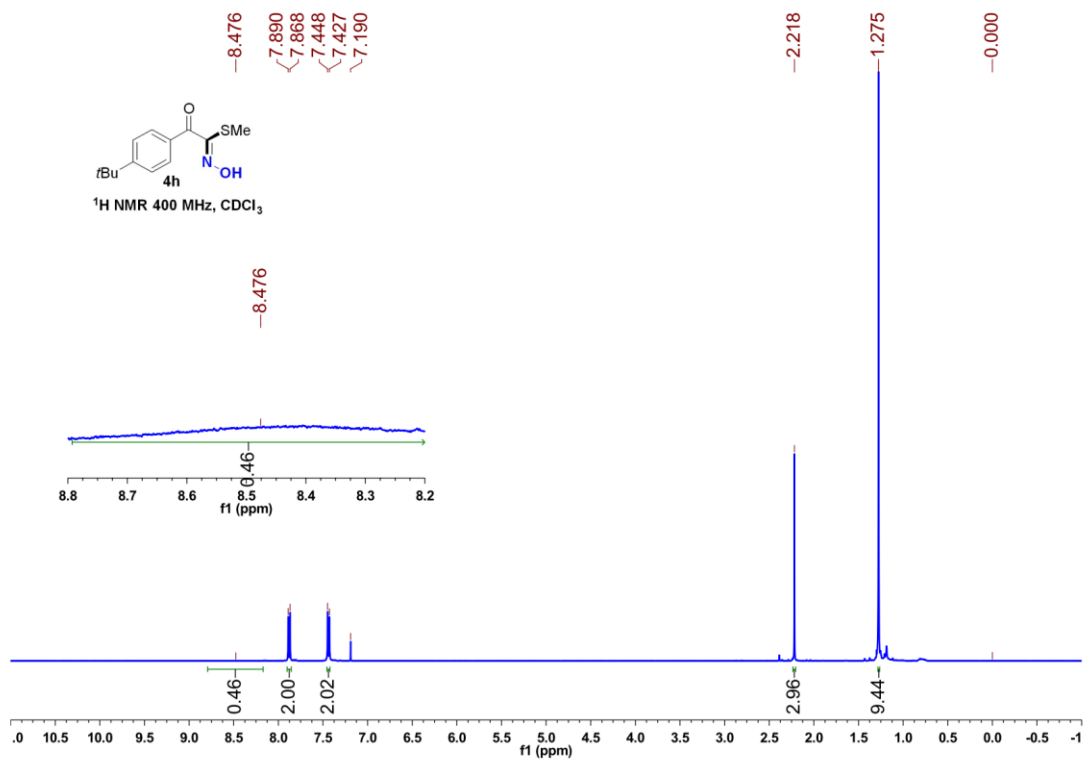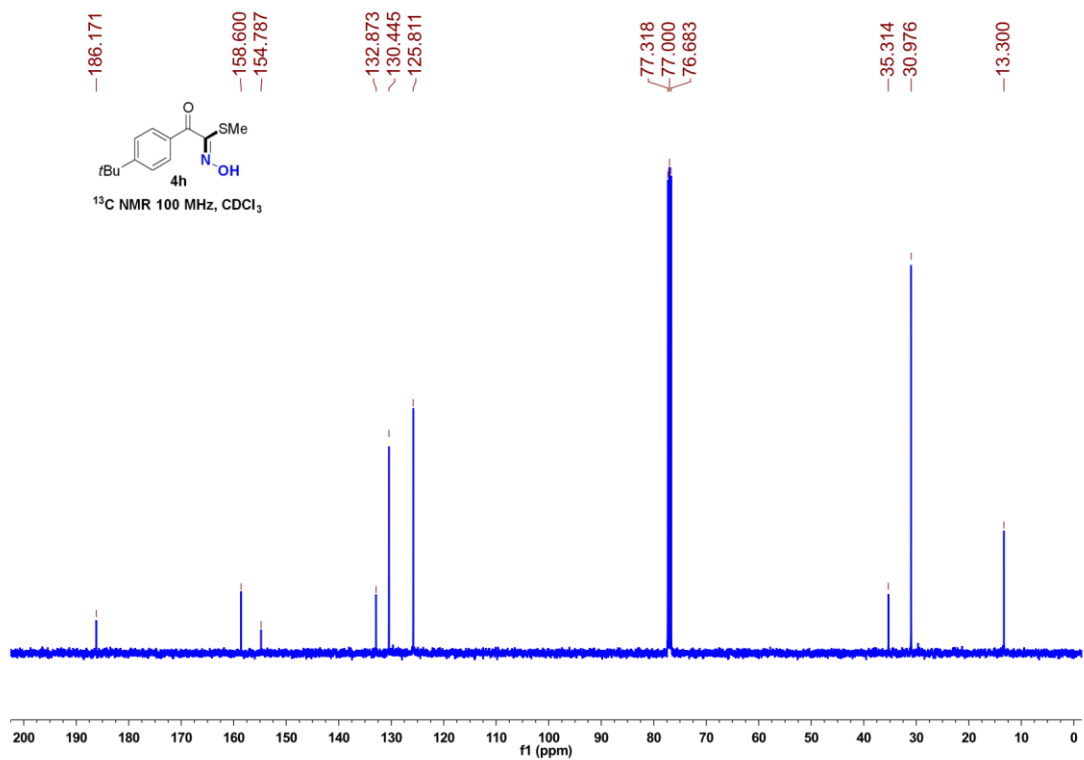

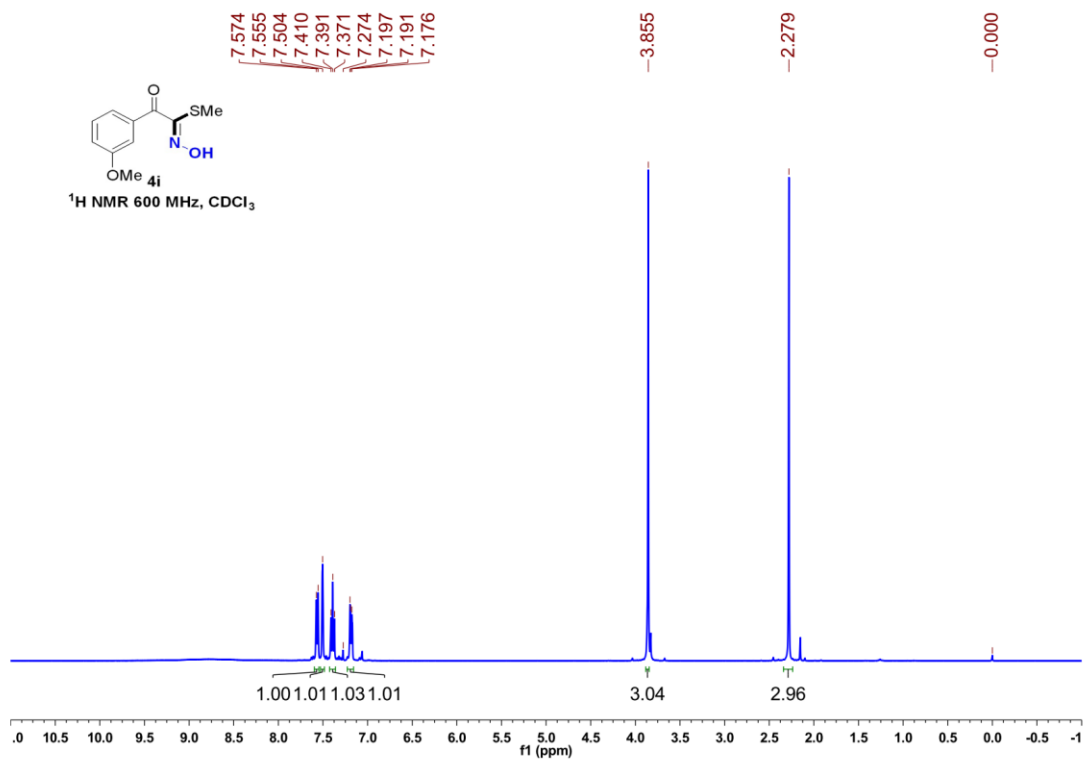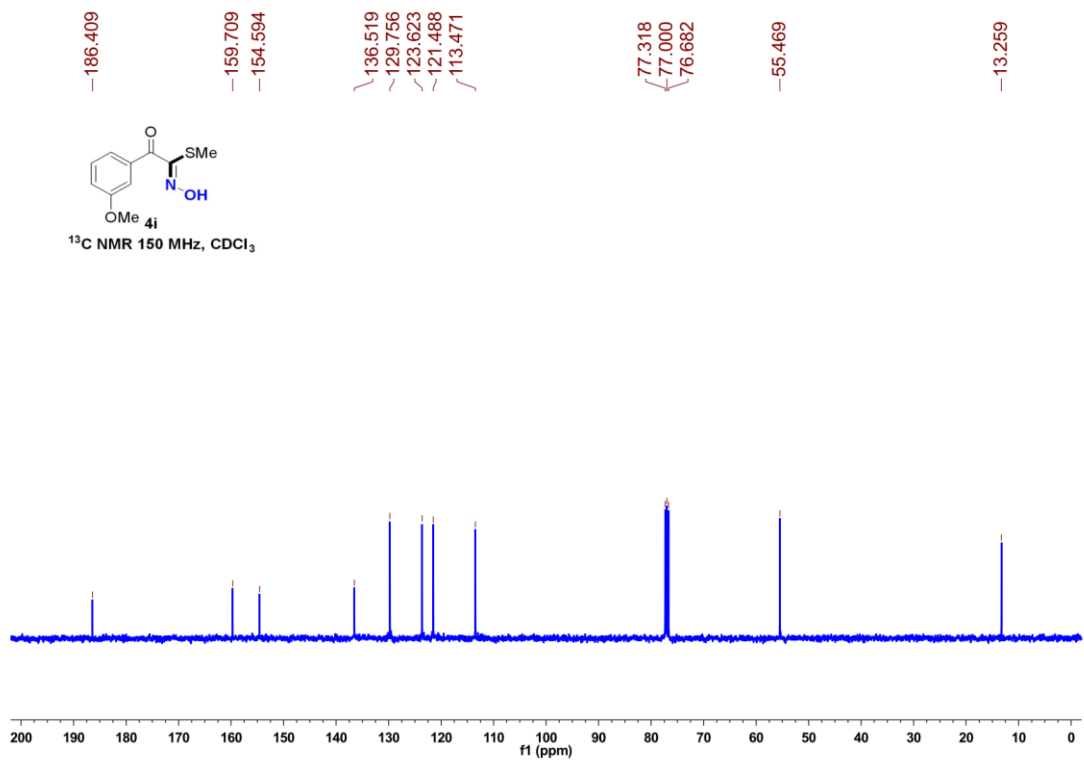



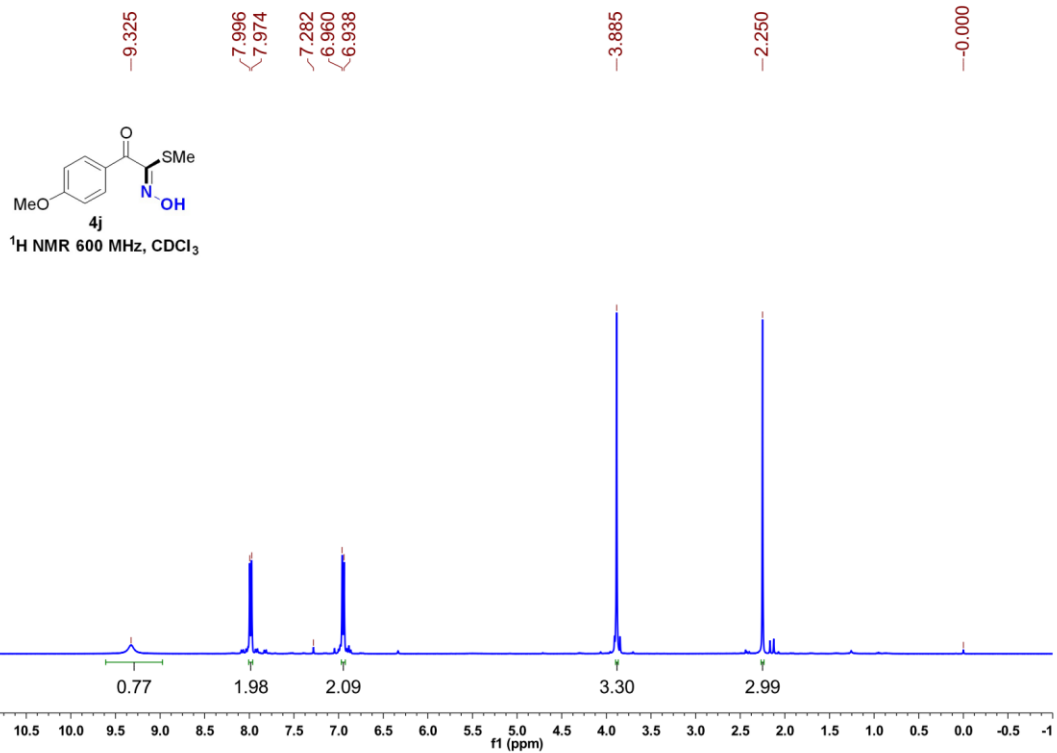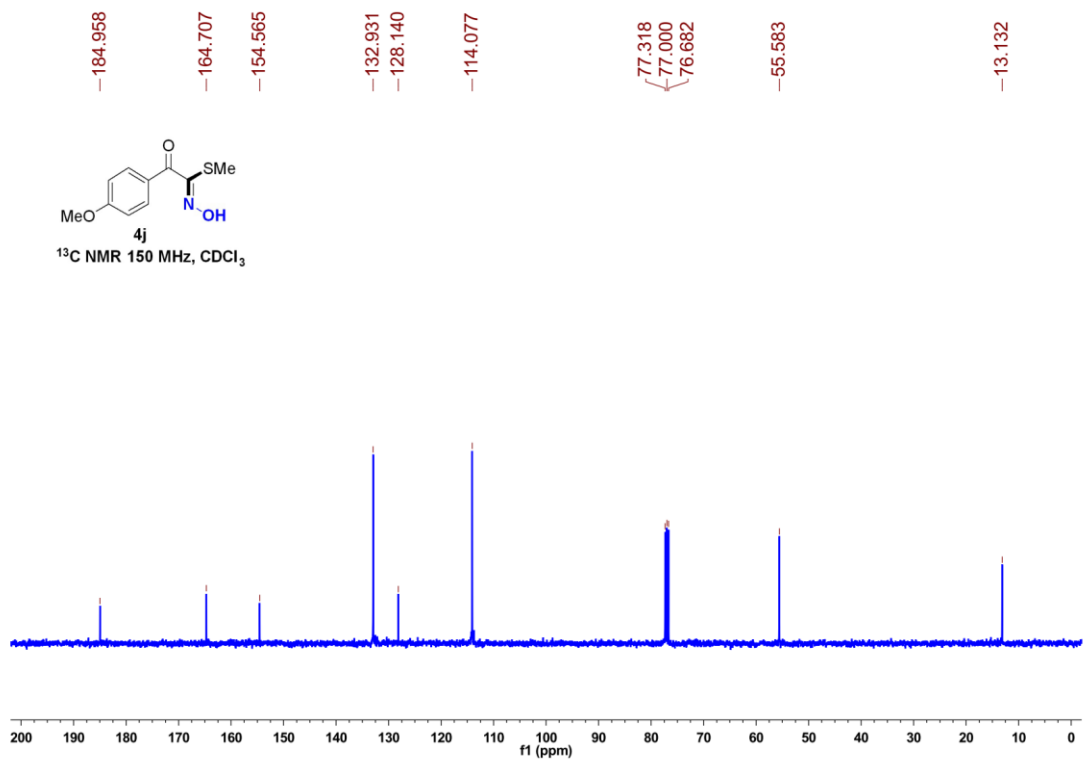

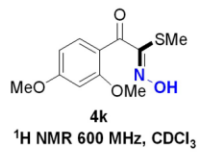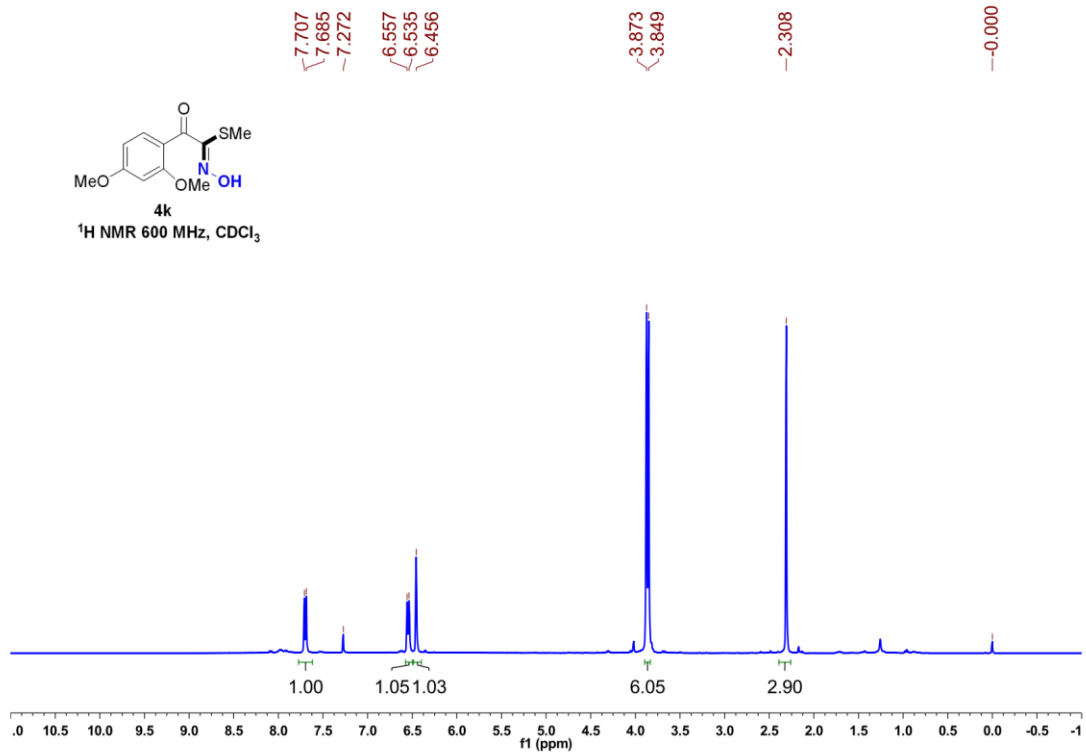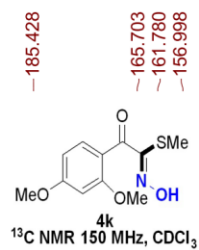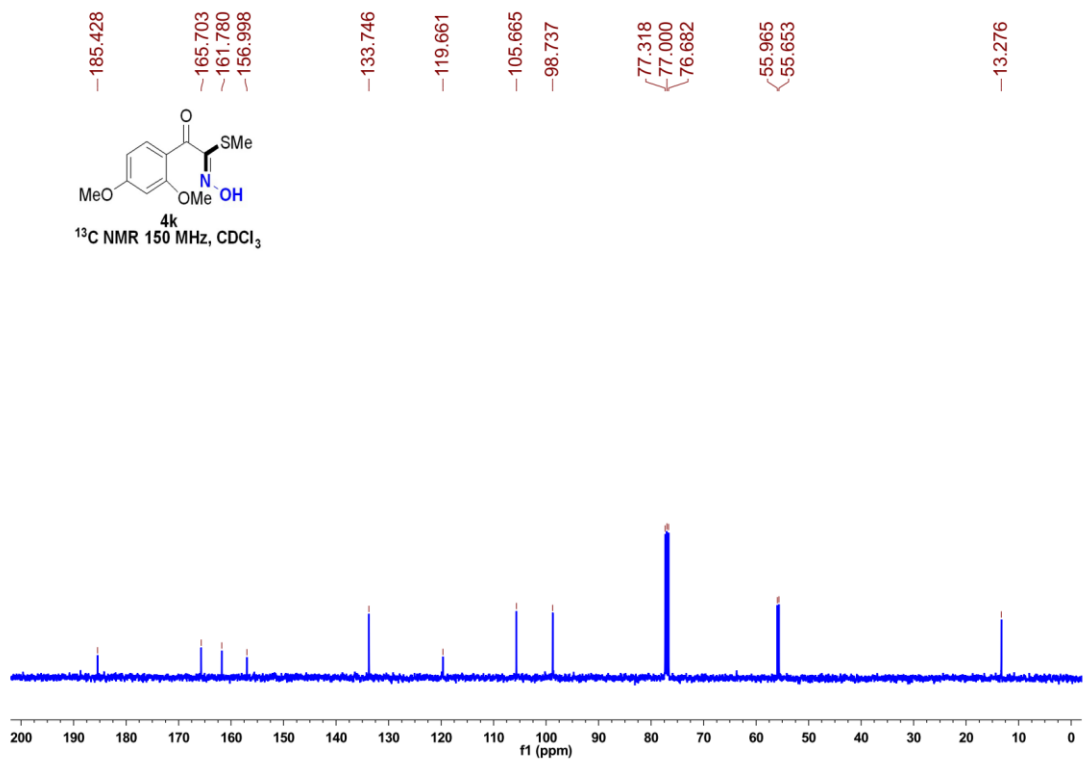

-12.265

7.535  
7.514  
7.378  
7.102  
7.082  
-6.180

-3.405  
-2.500  
-2.182

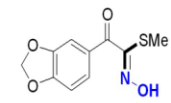

4I  
<sup>1</sup>H NMR 600 MHz, DMSO-d<sub>6</sub>

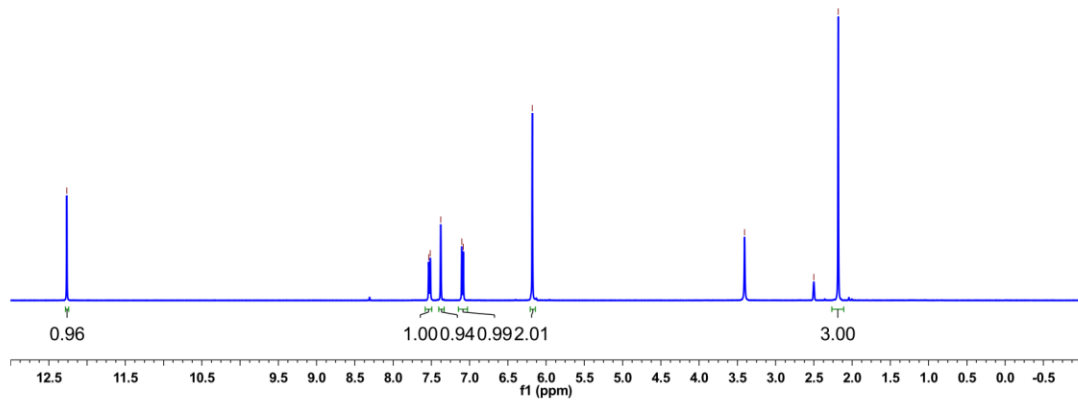

-185.122

152.875  
151.633  
148.149

130.051  
128.192

108.300  
108.185  
102.578

40.126  
39.917  
39.708  
39.500  
39.291  
39.082  
38.874

-12.511

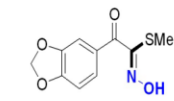

4I  
<sup>13</sup>C NMR 150 MHz, DMSO-d<sub>6</sub>

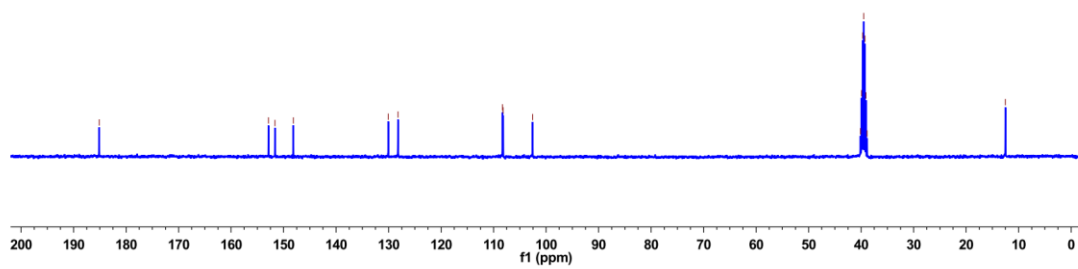

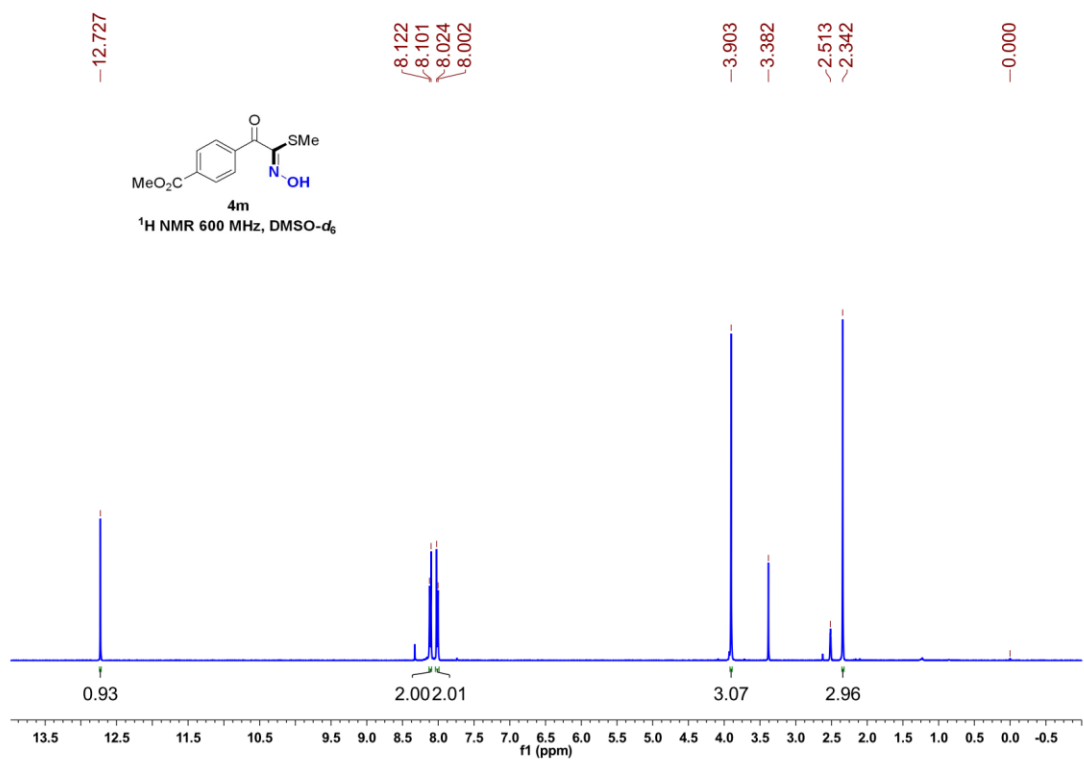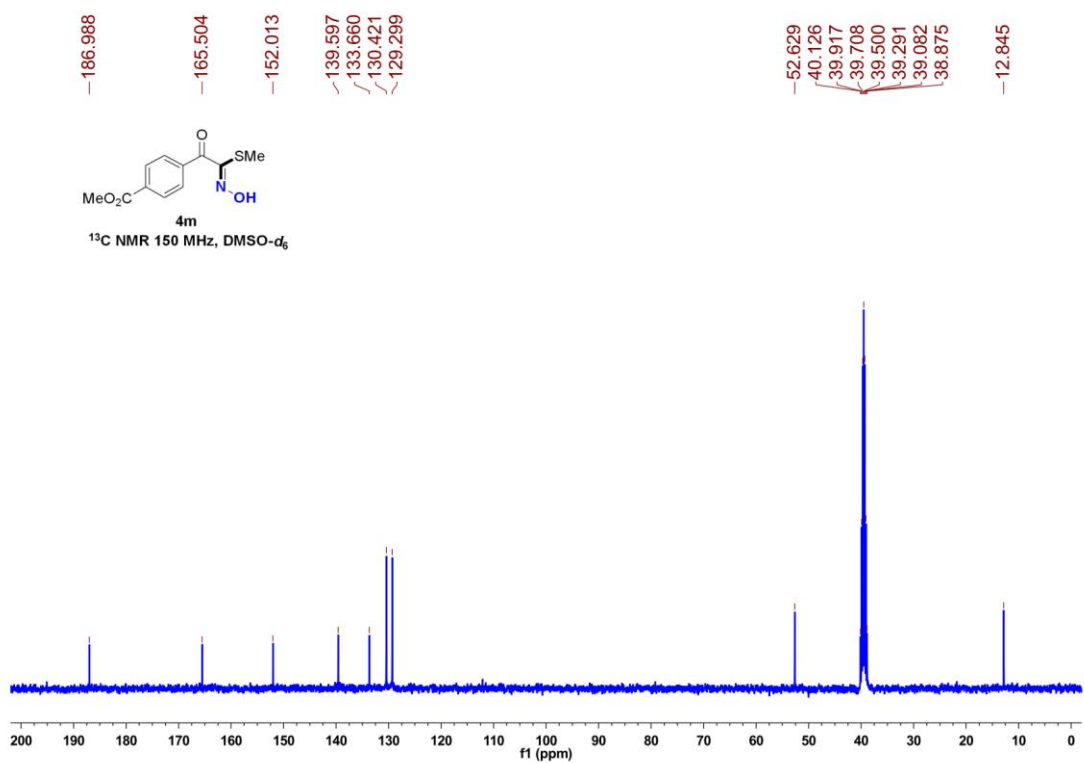

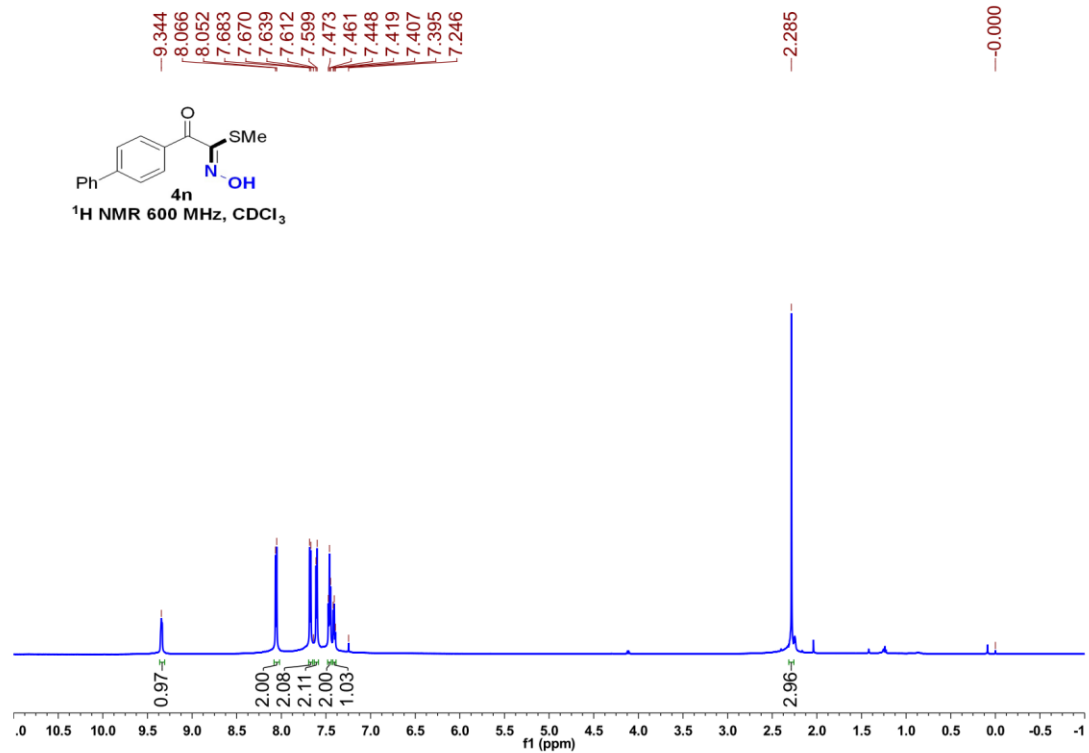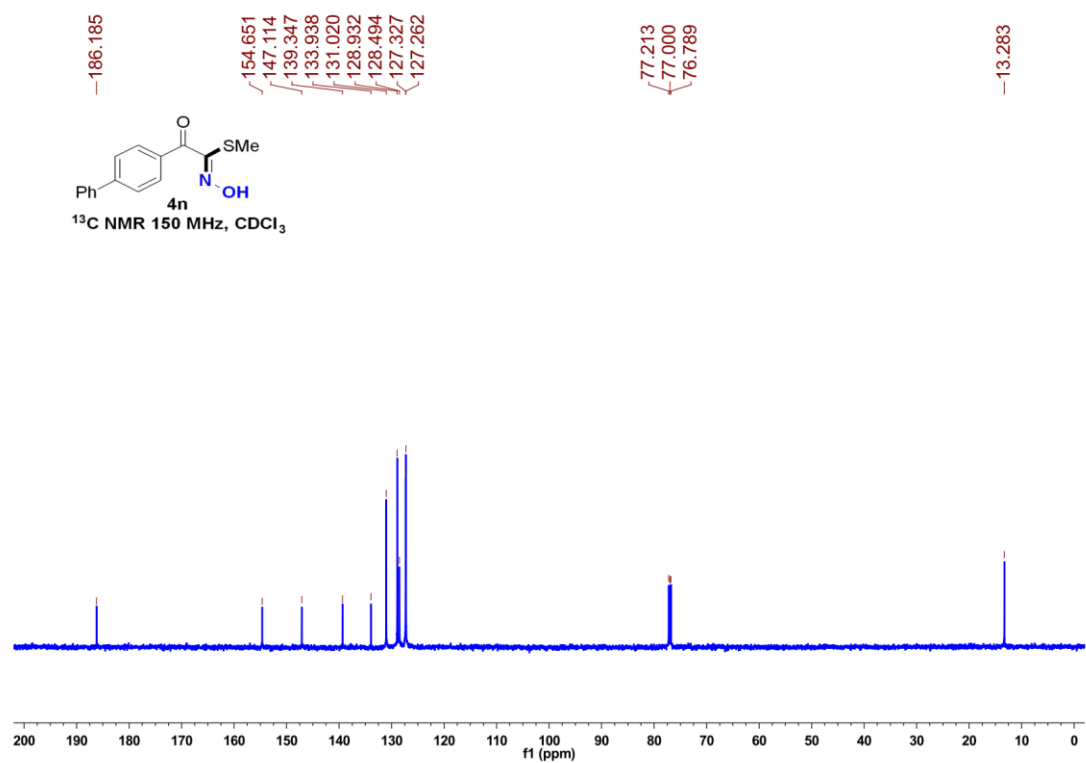

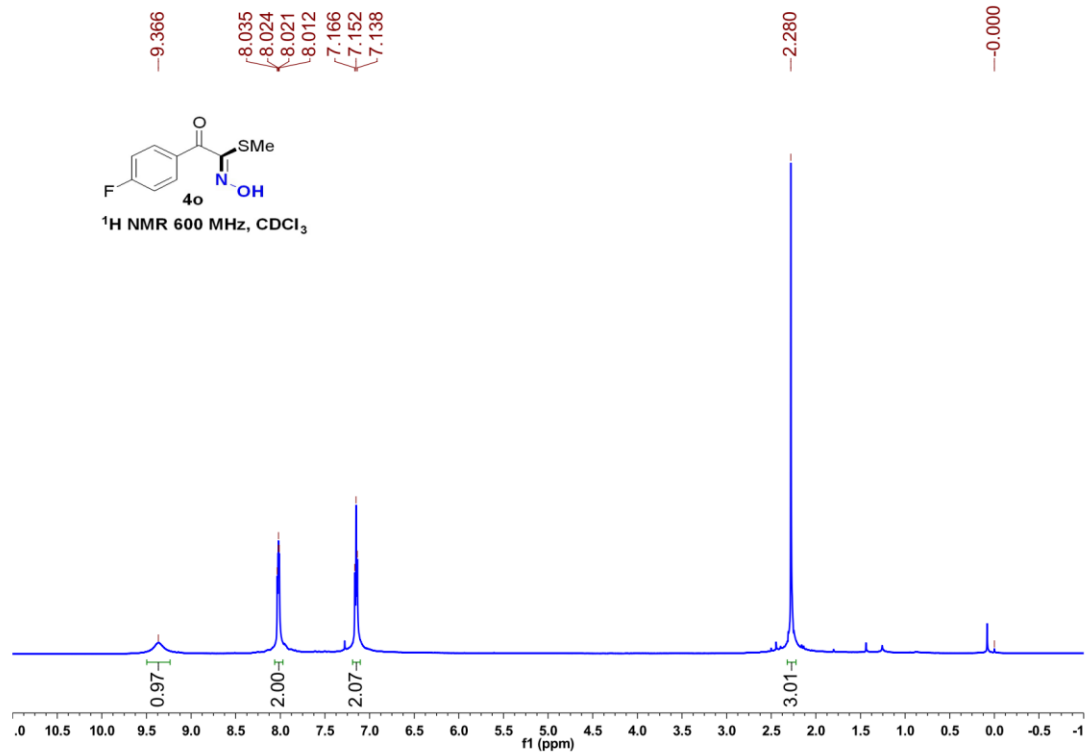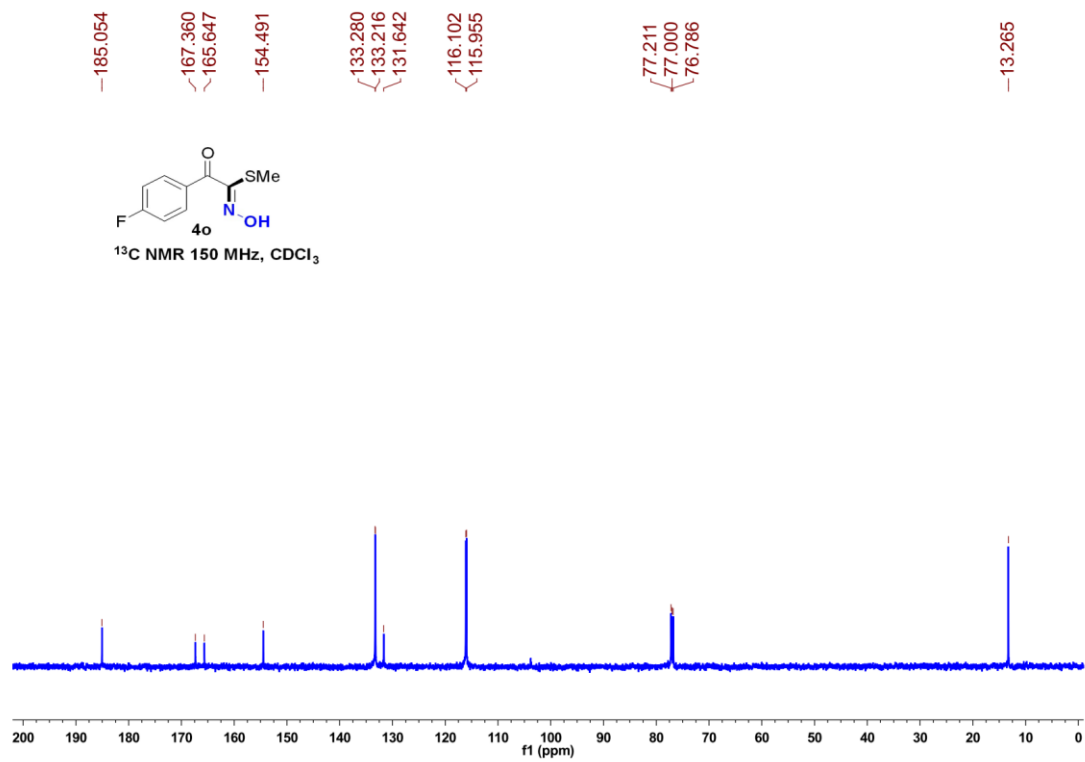

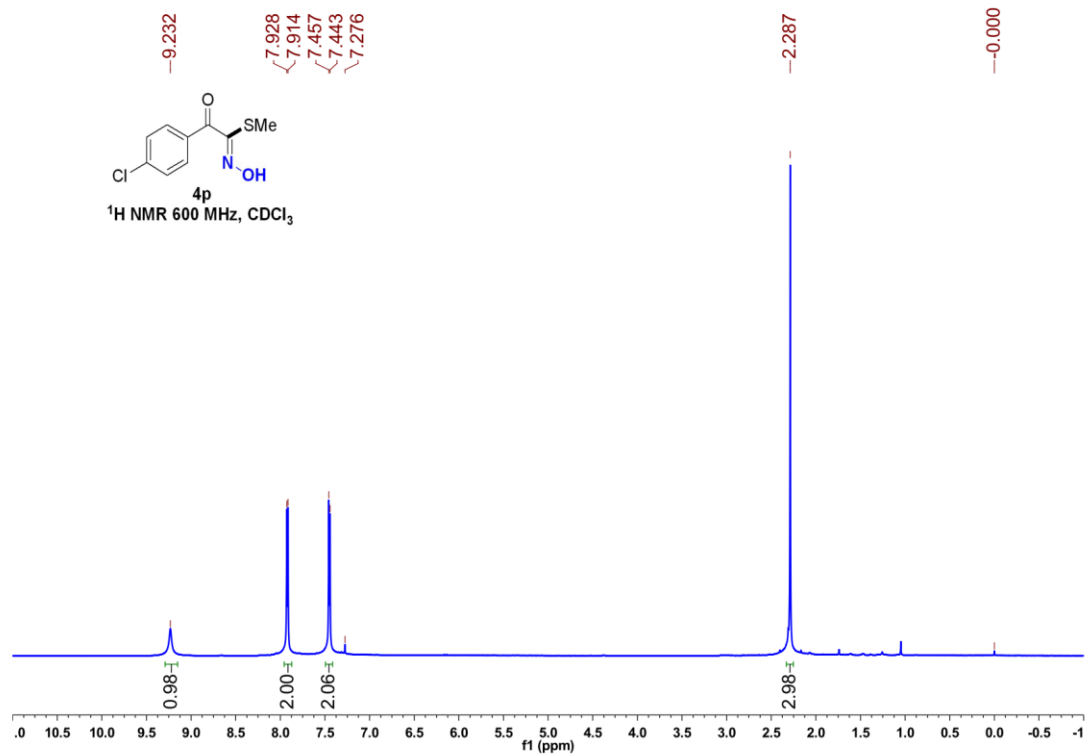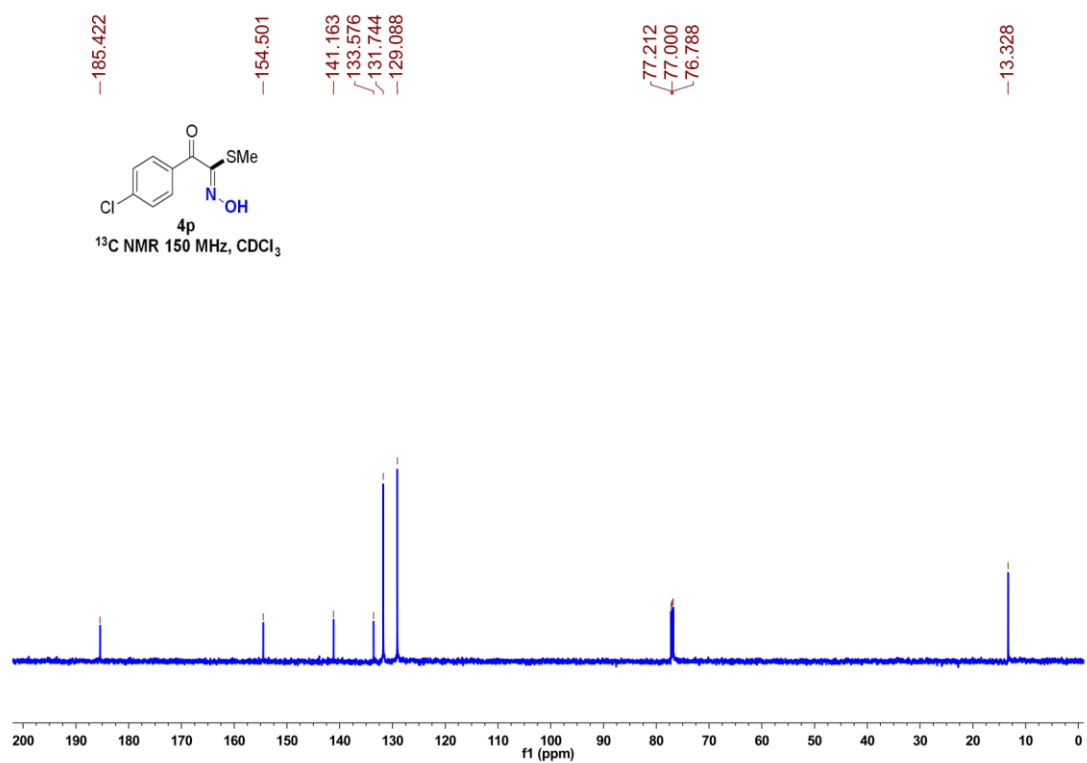

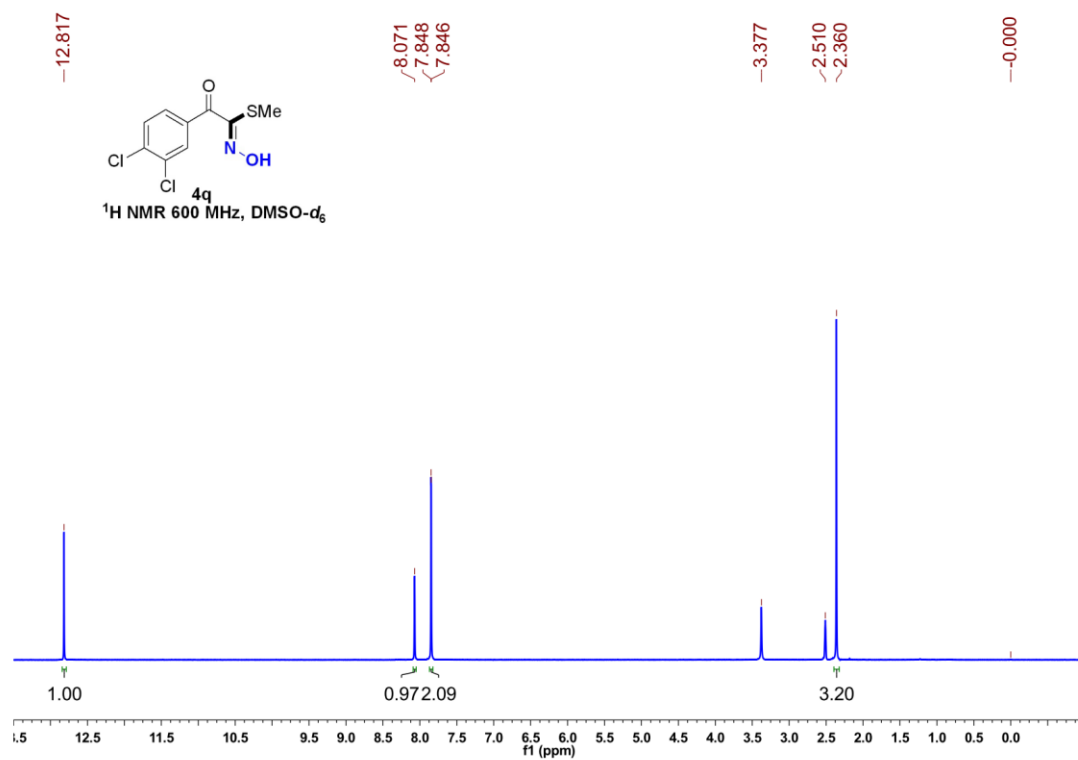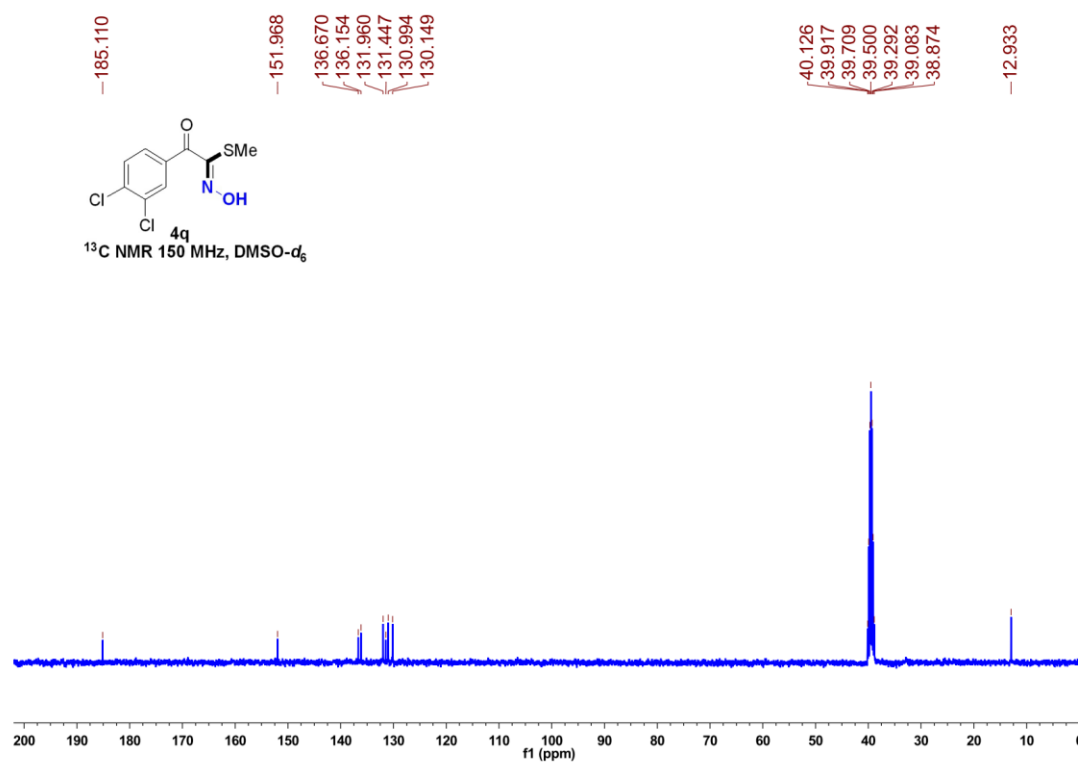



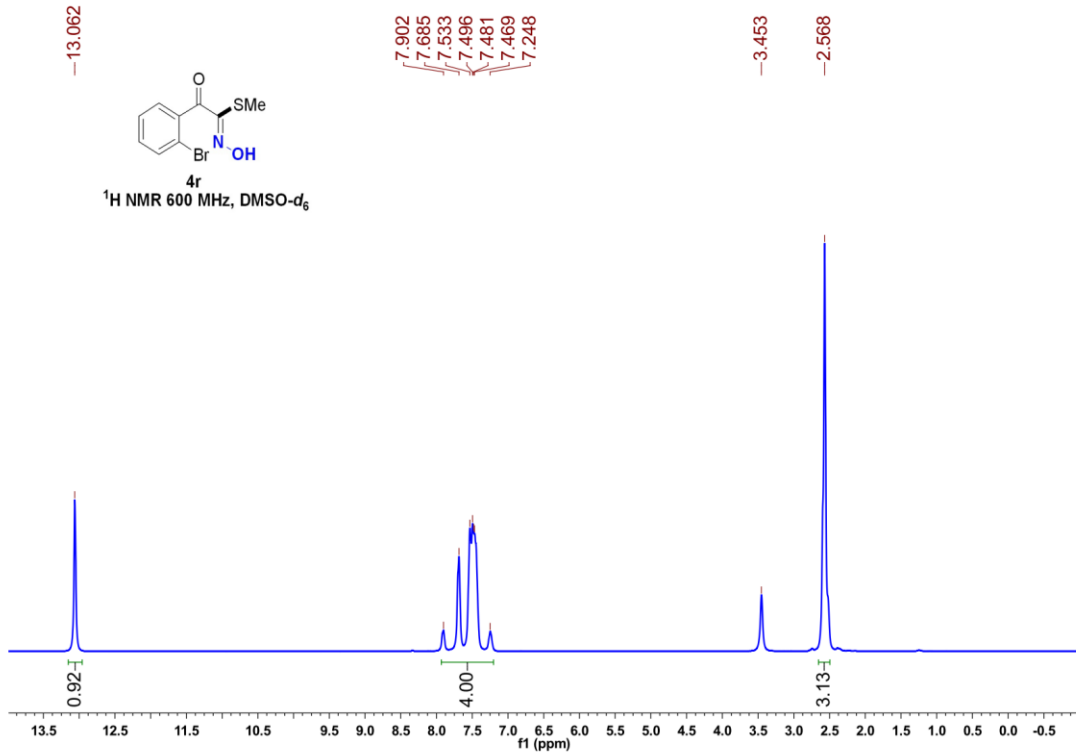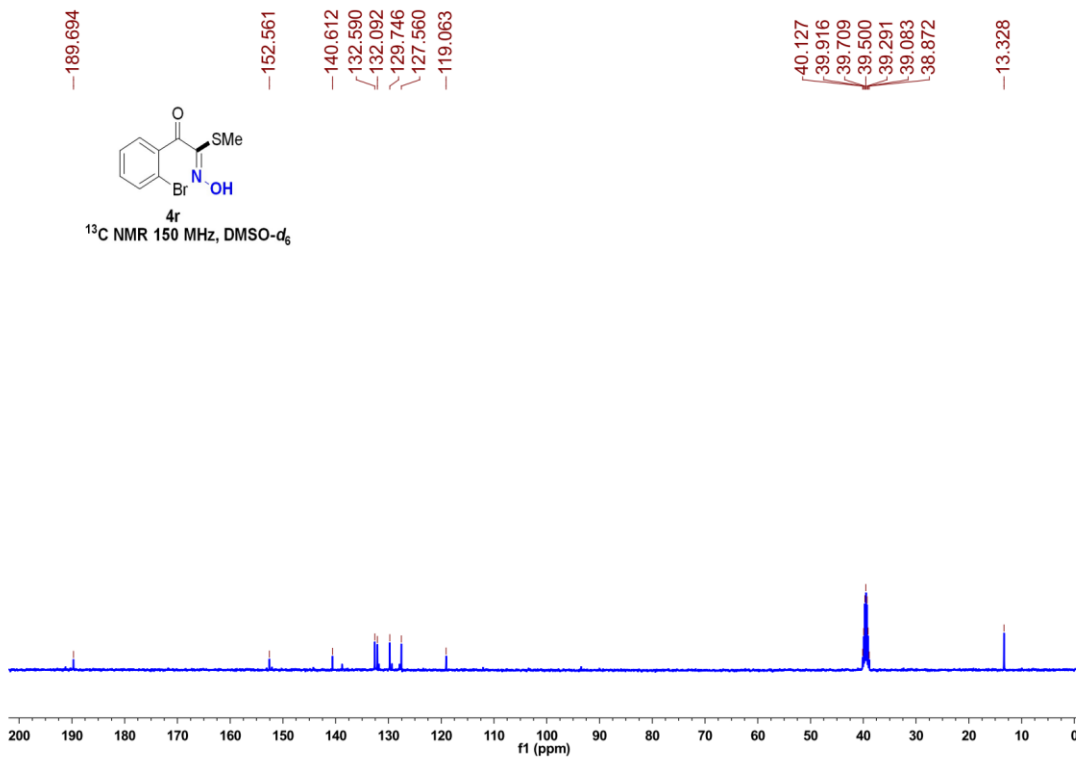

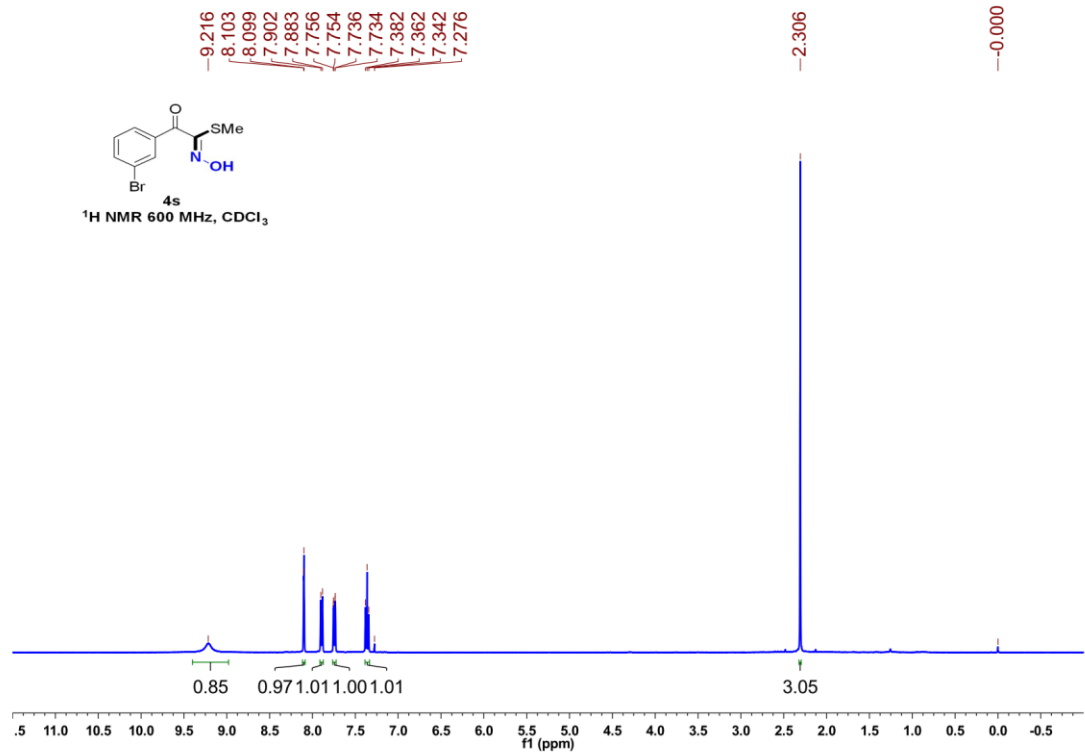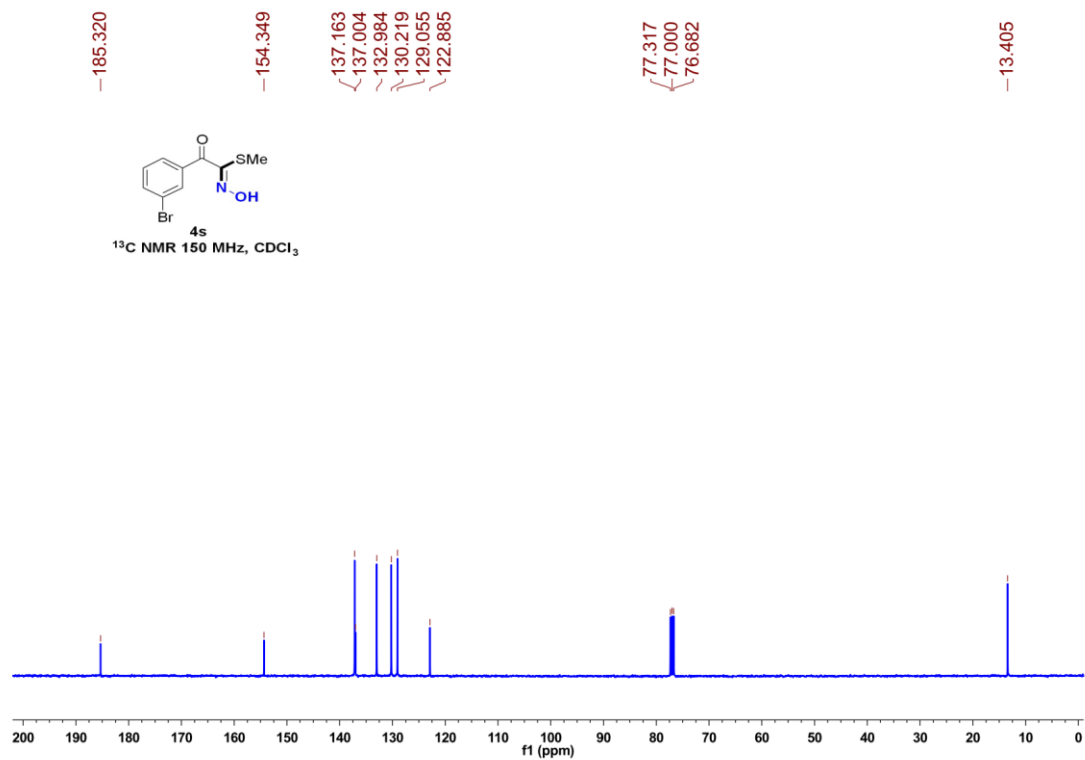

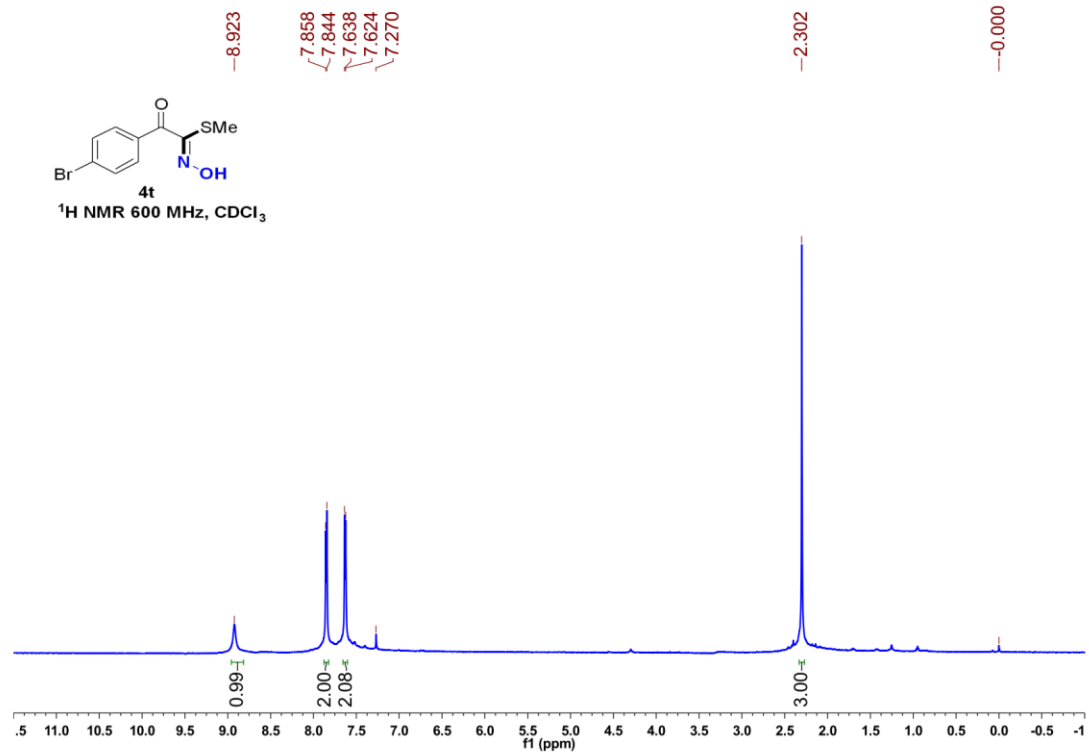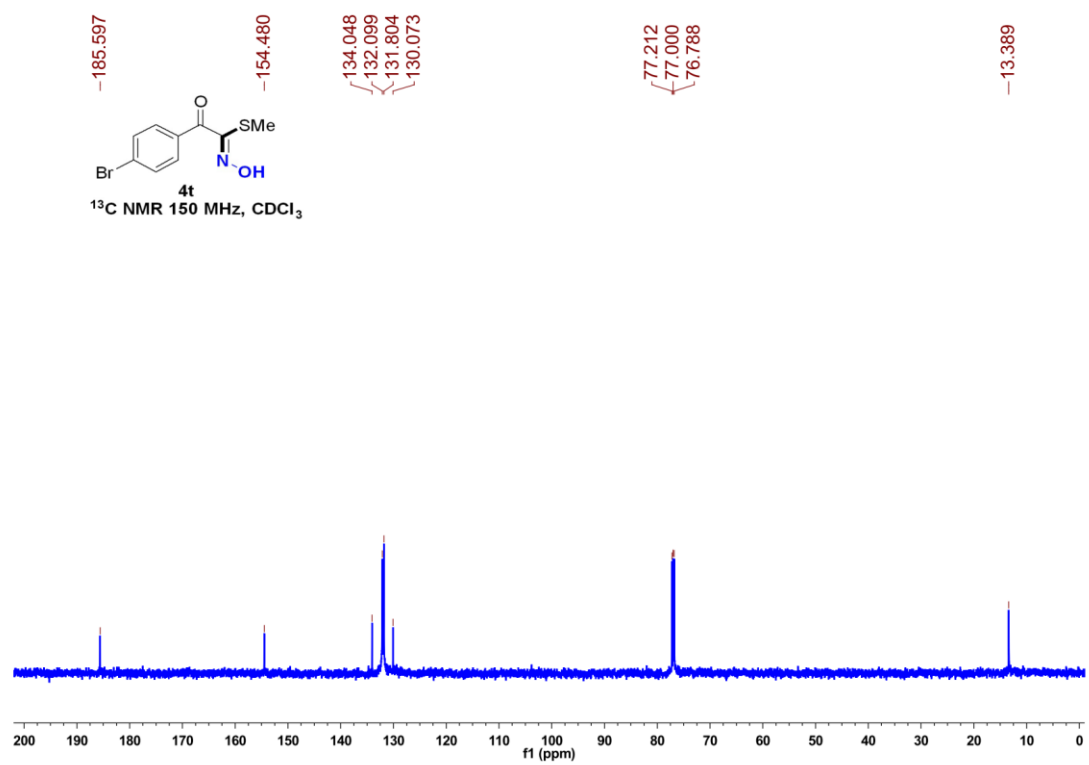

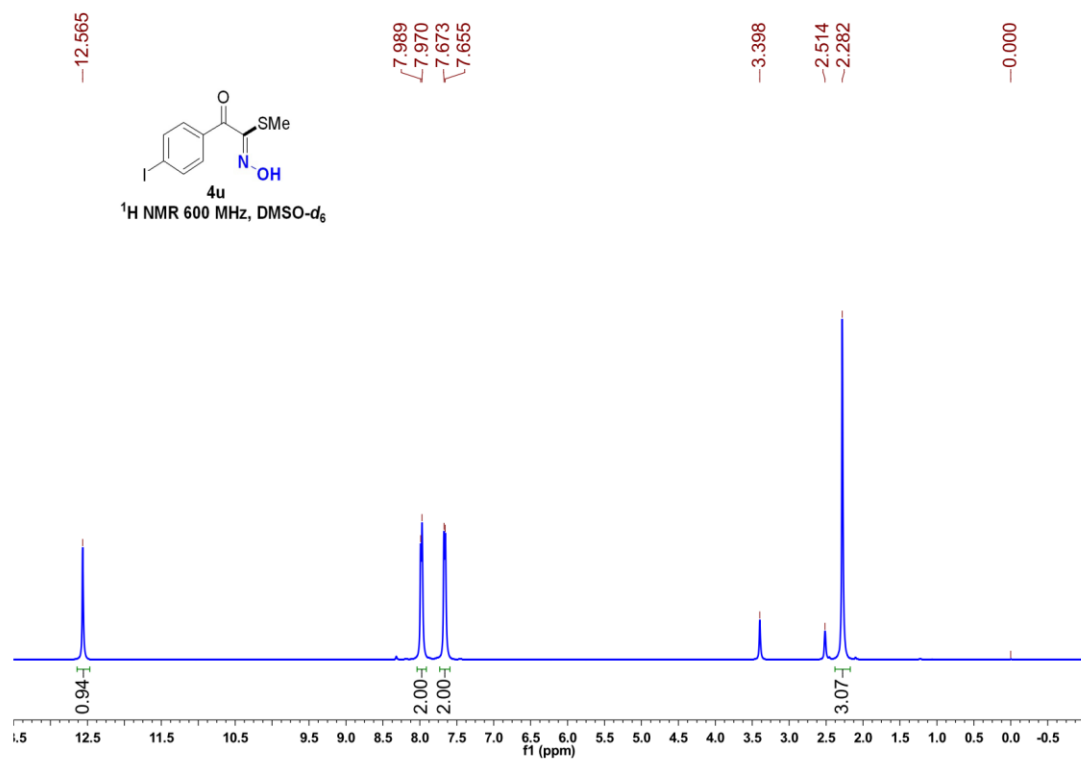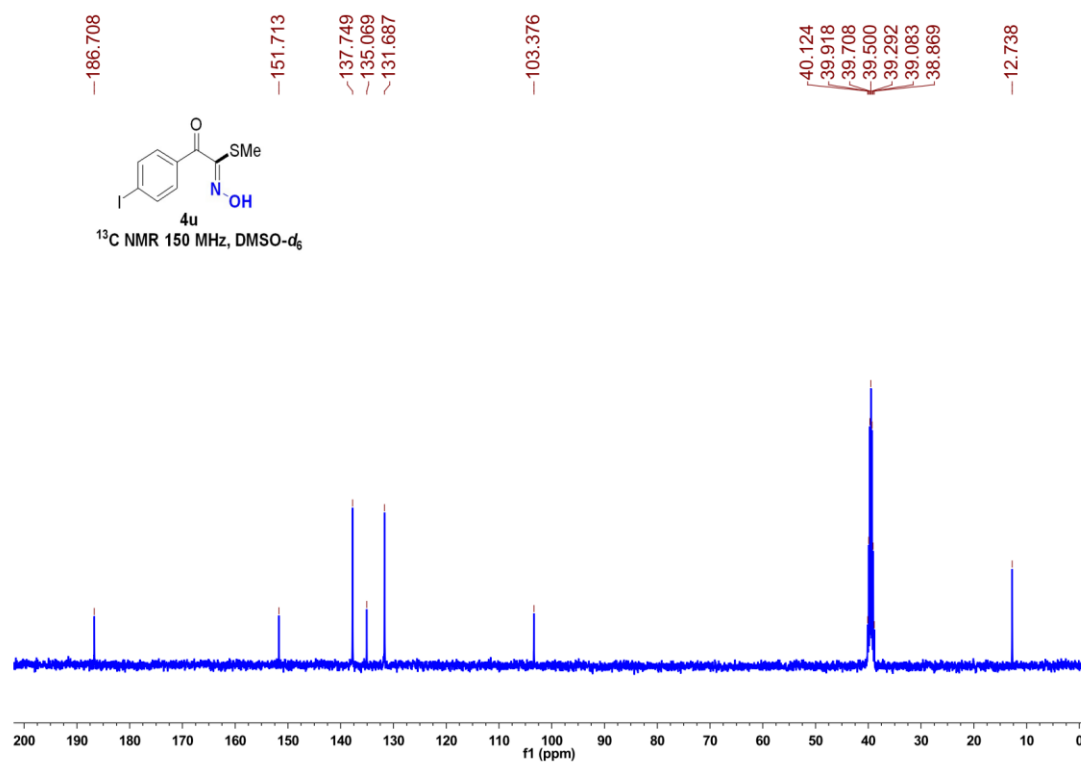

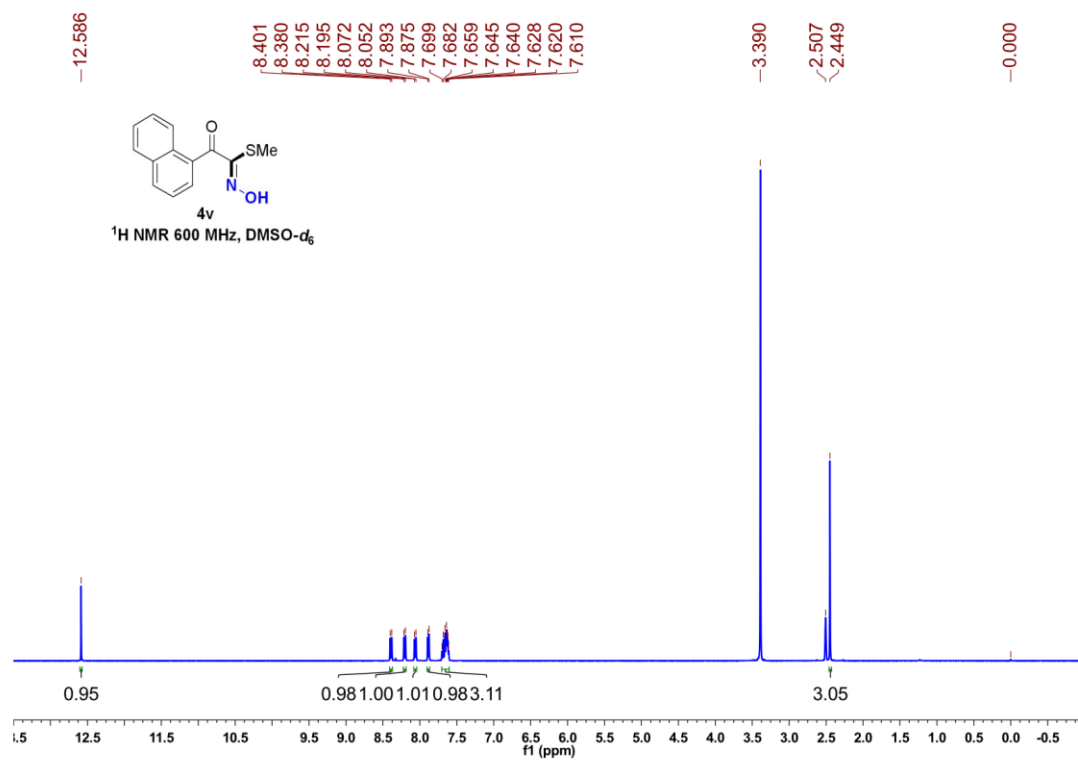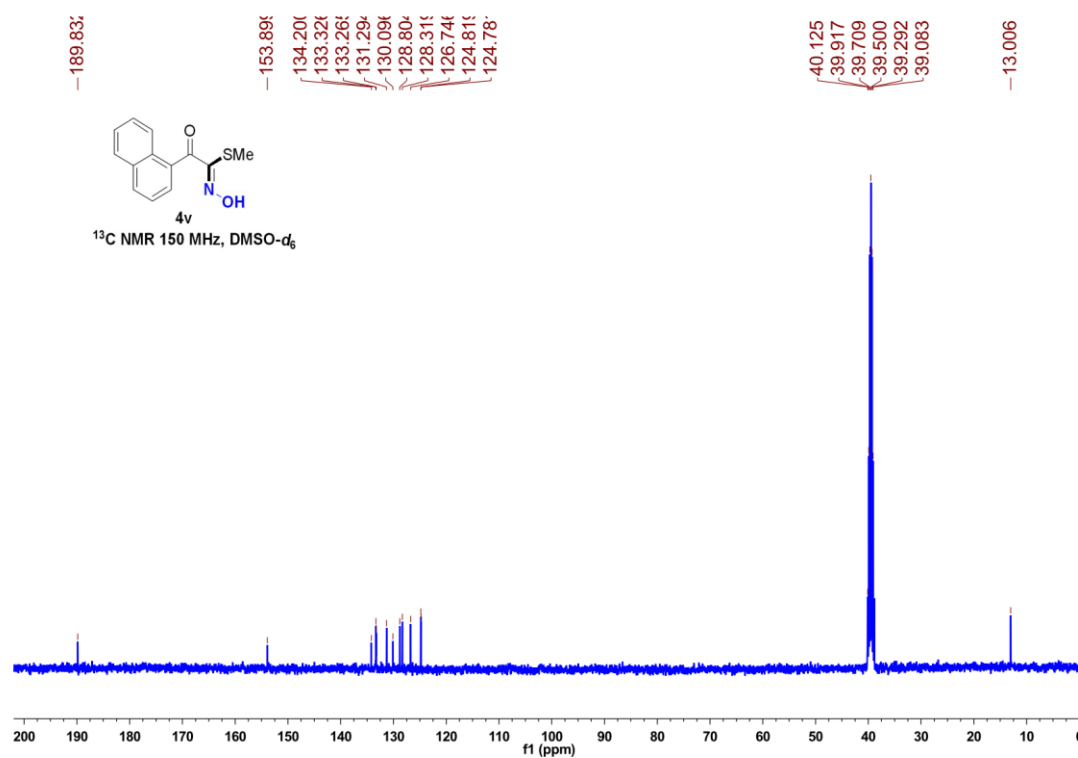

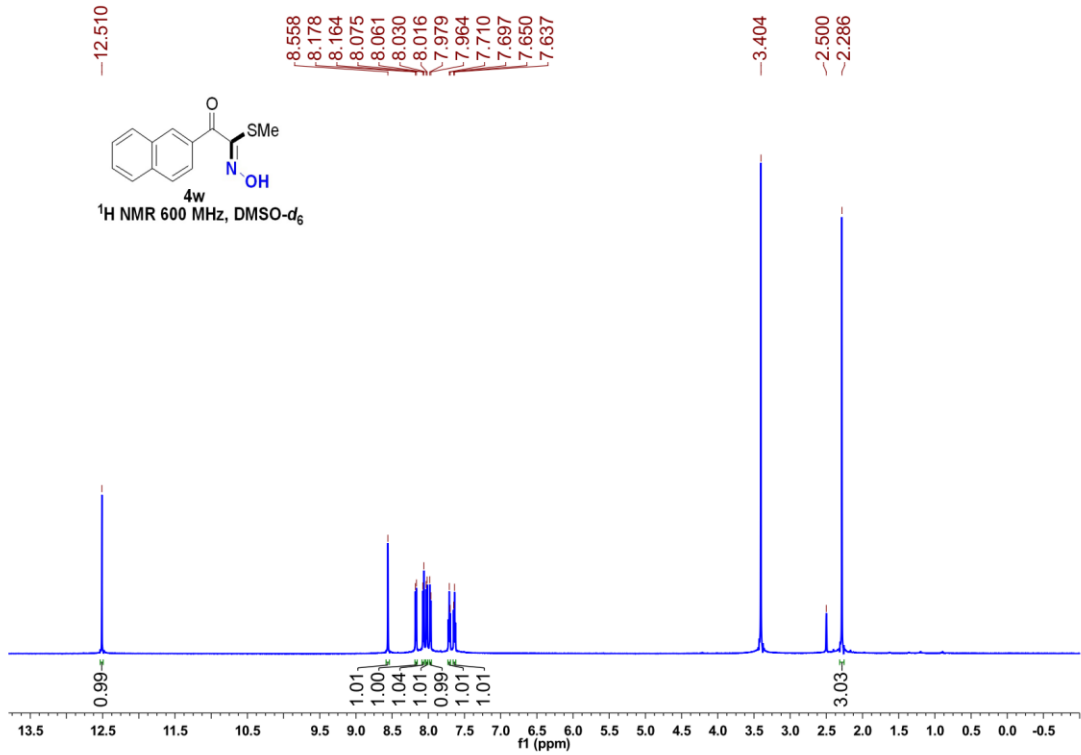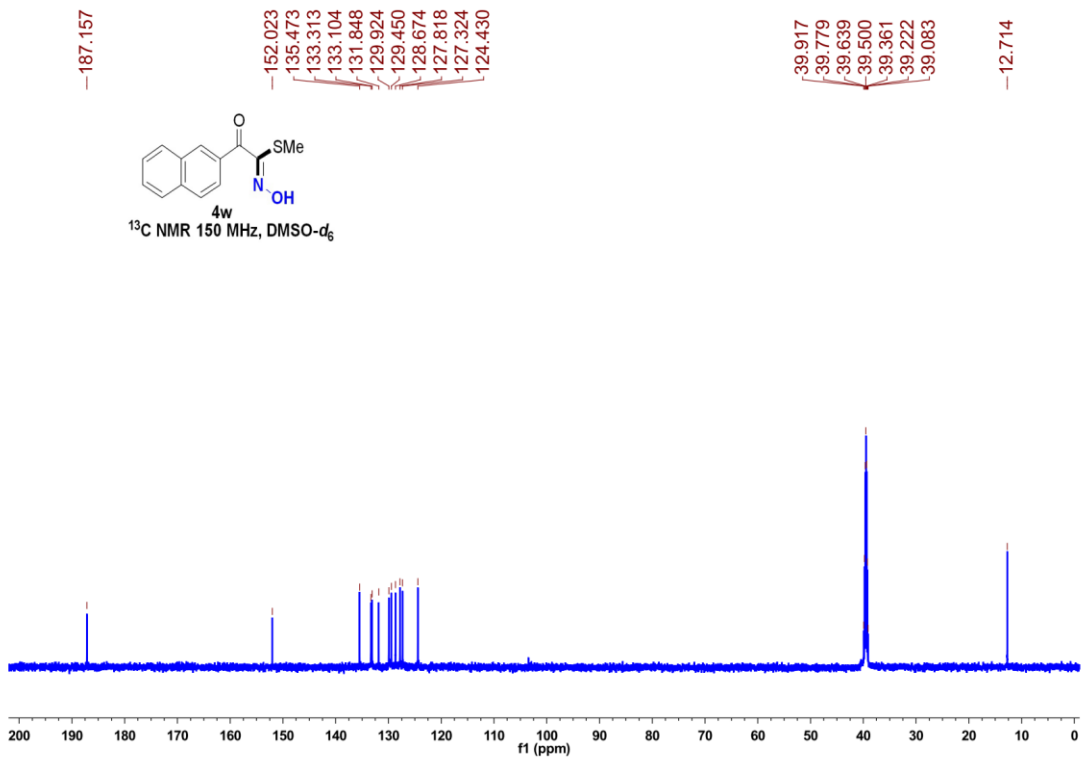

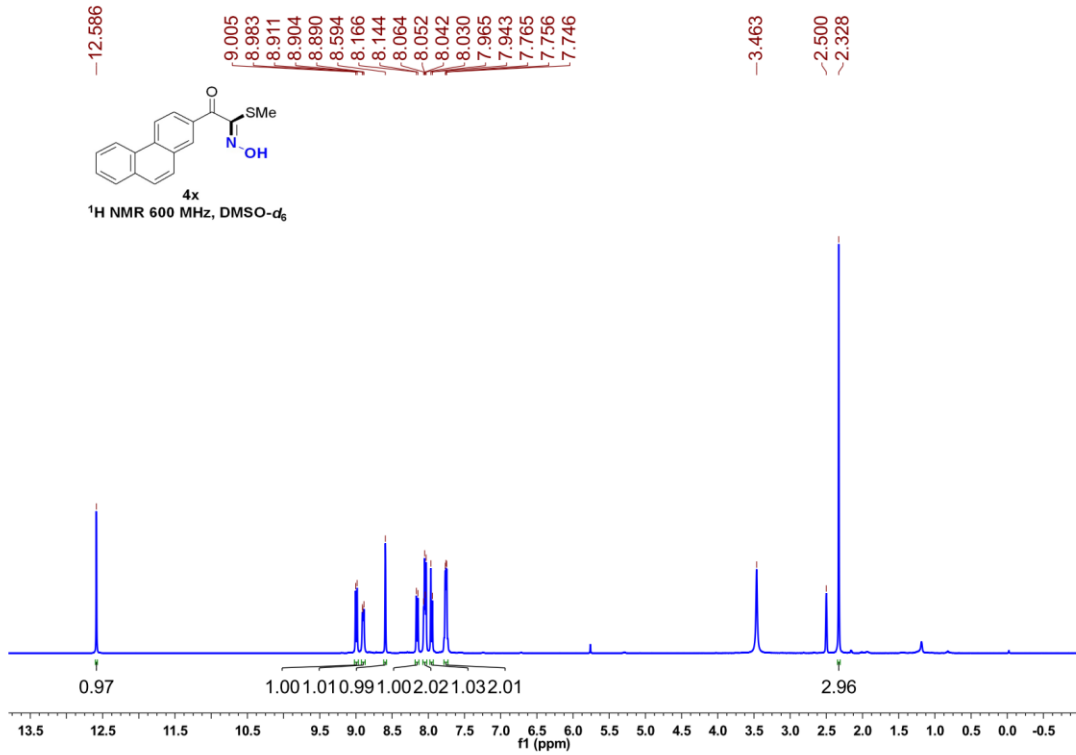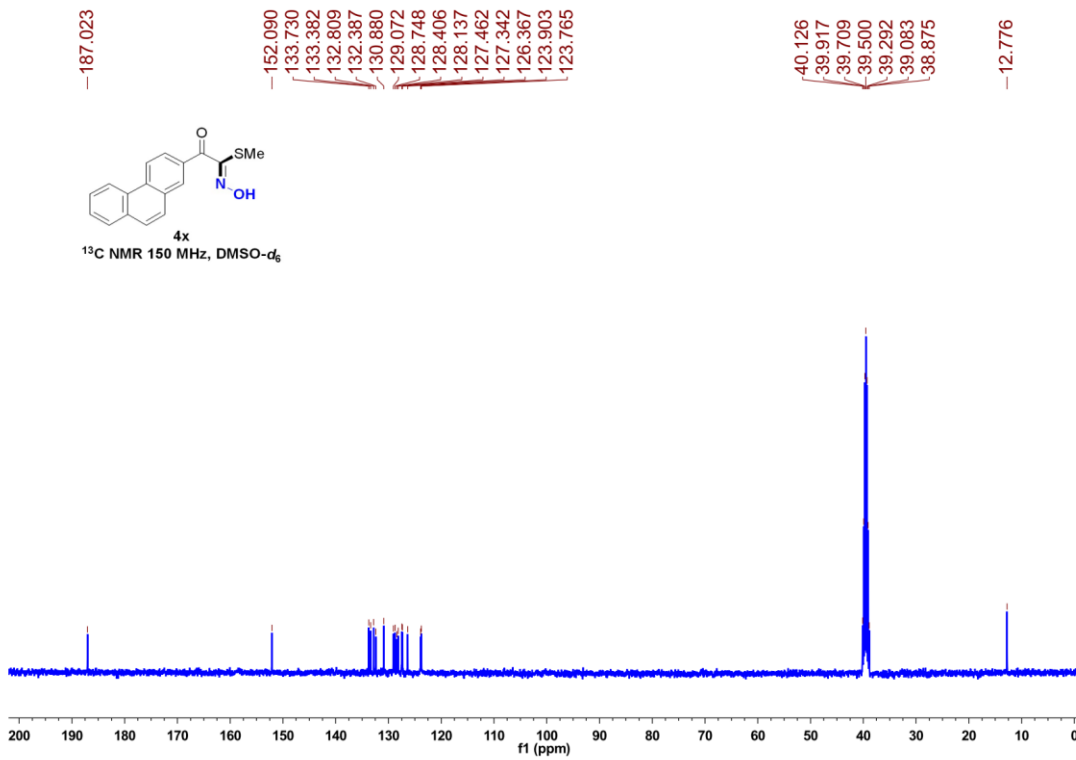

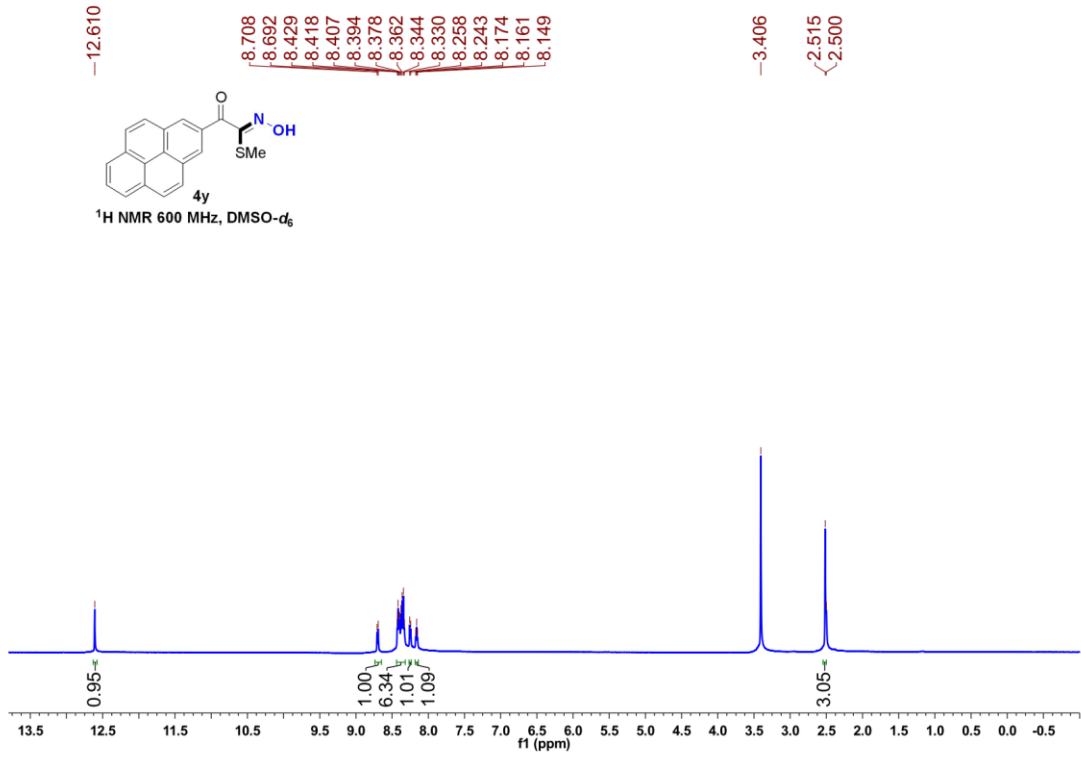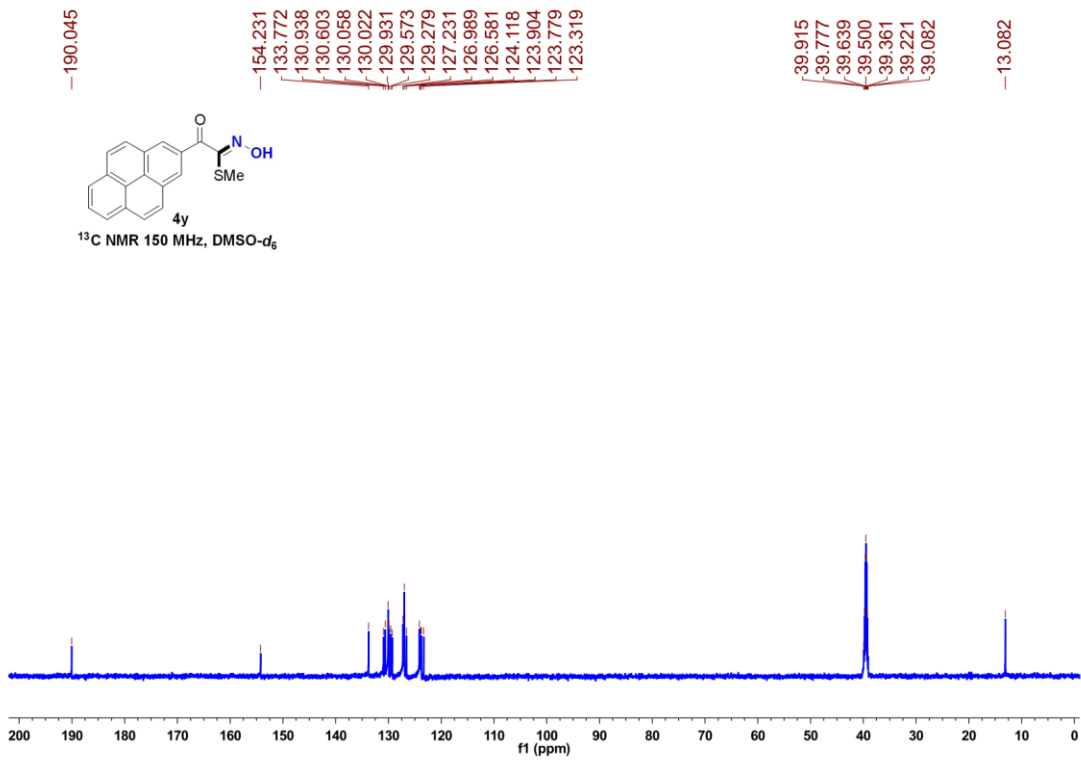



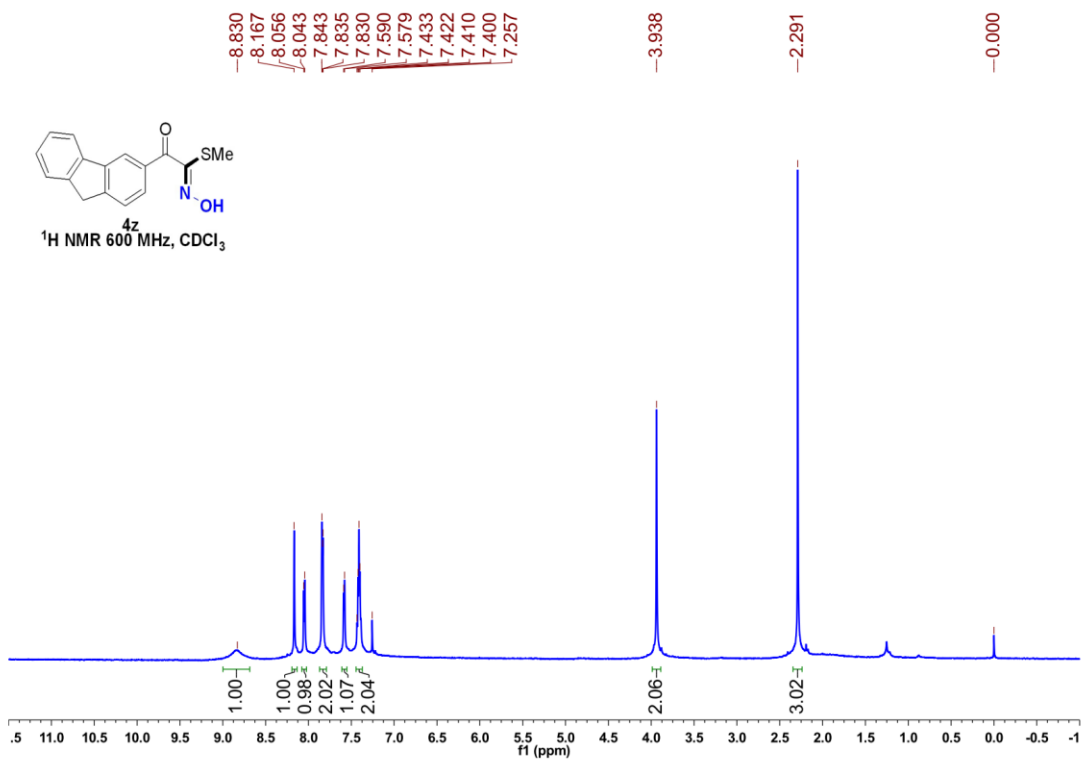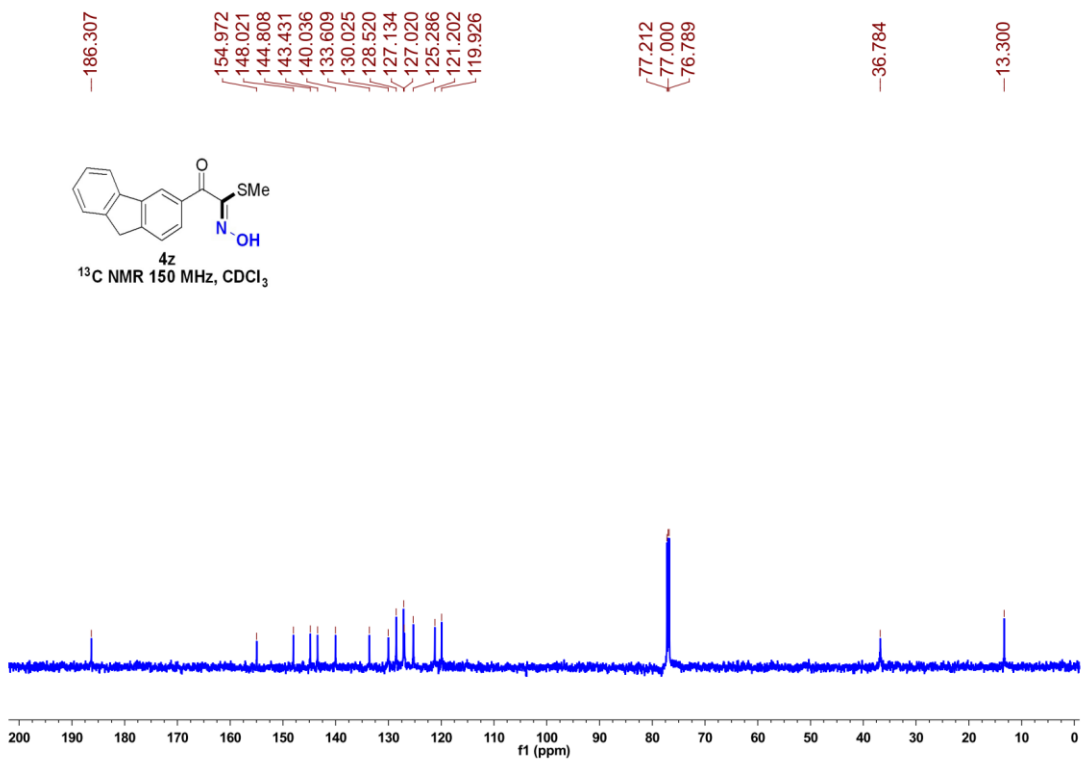

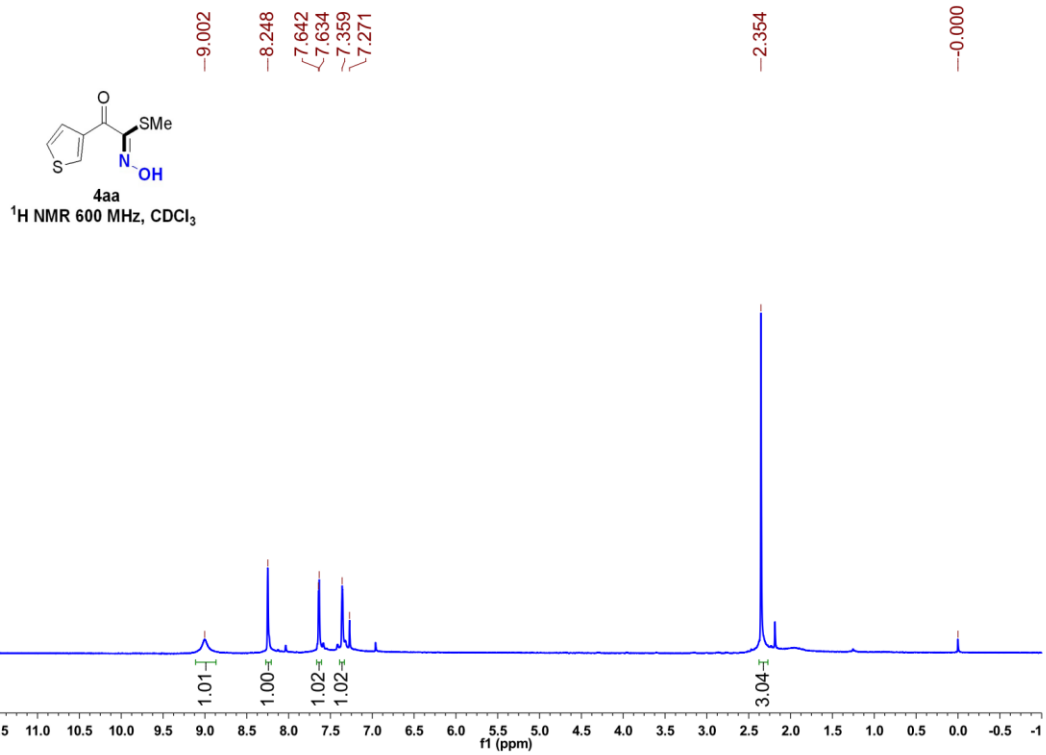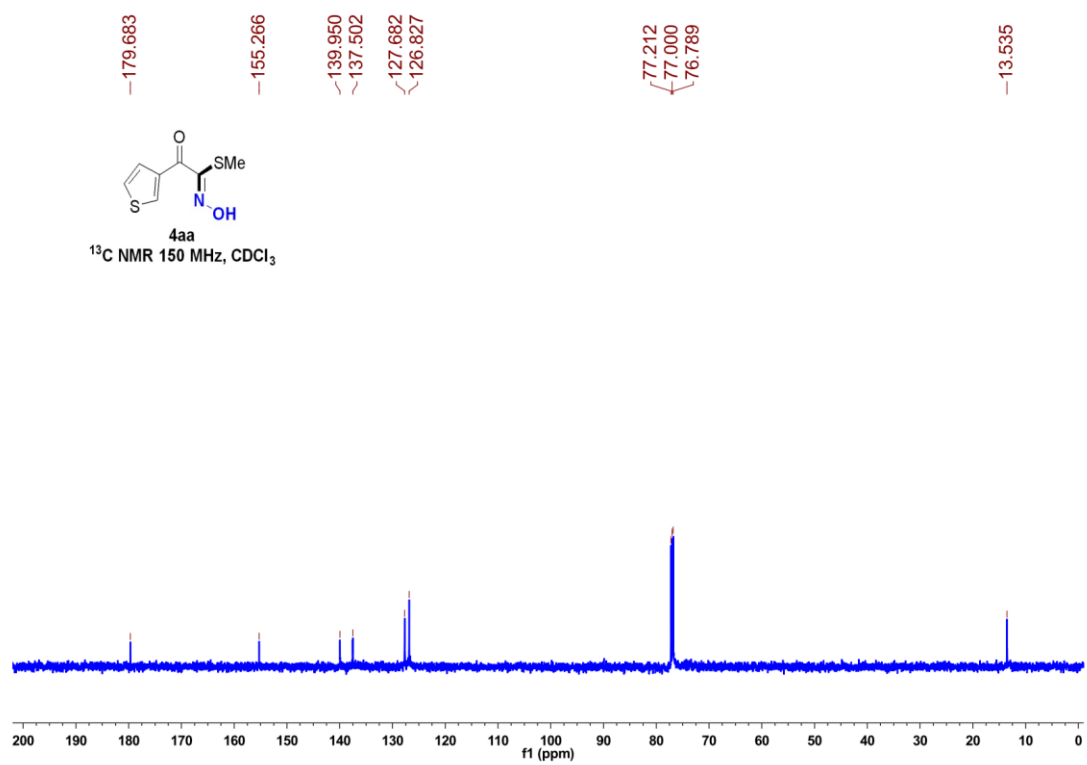

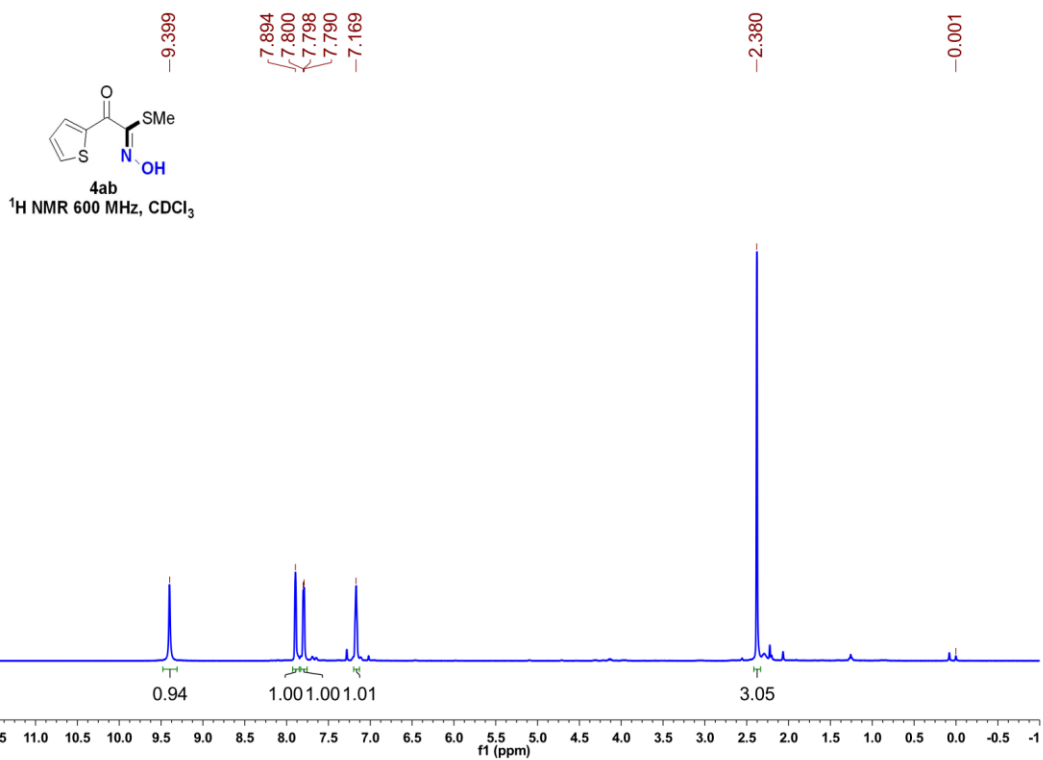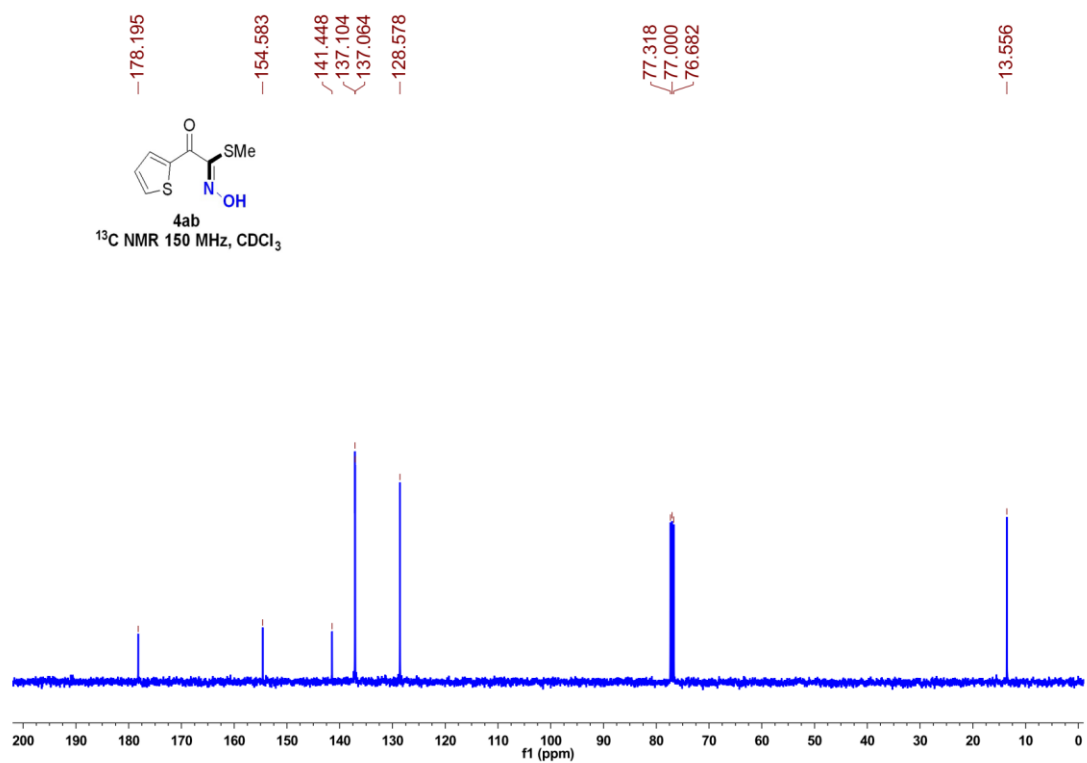

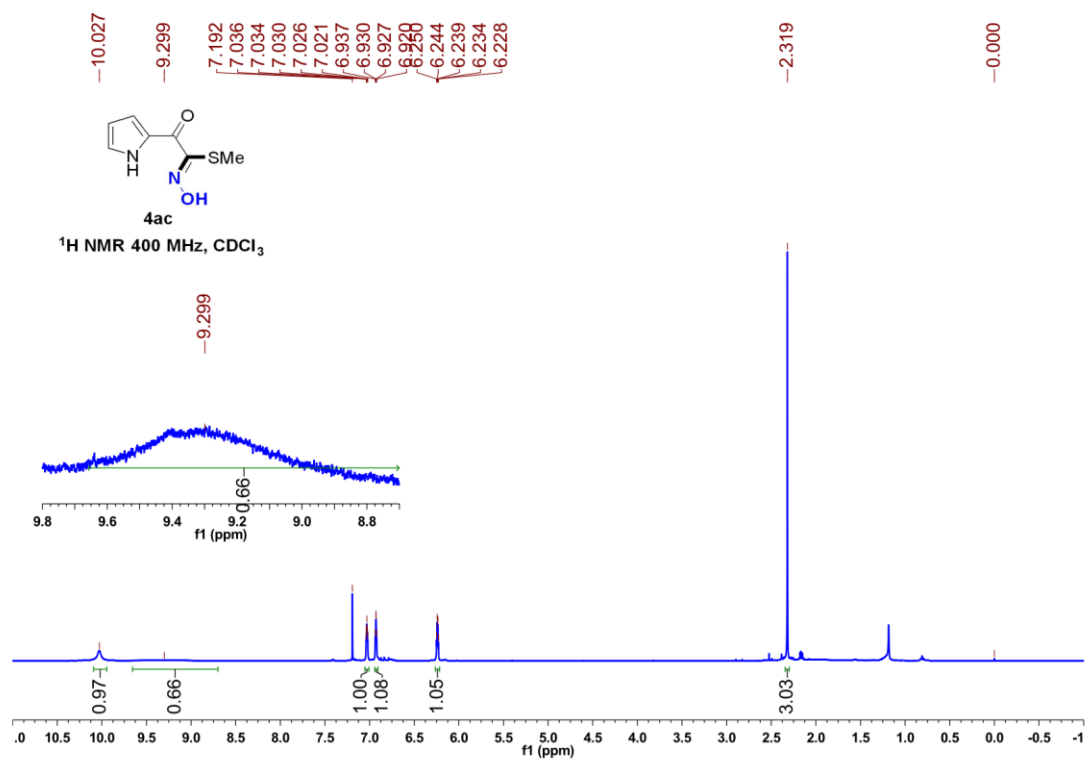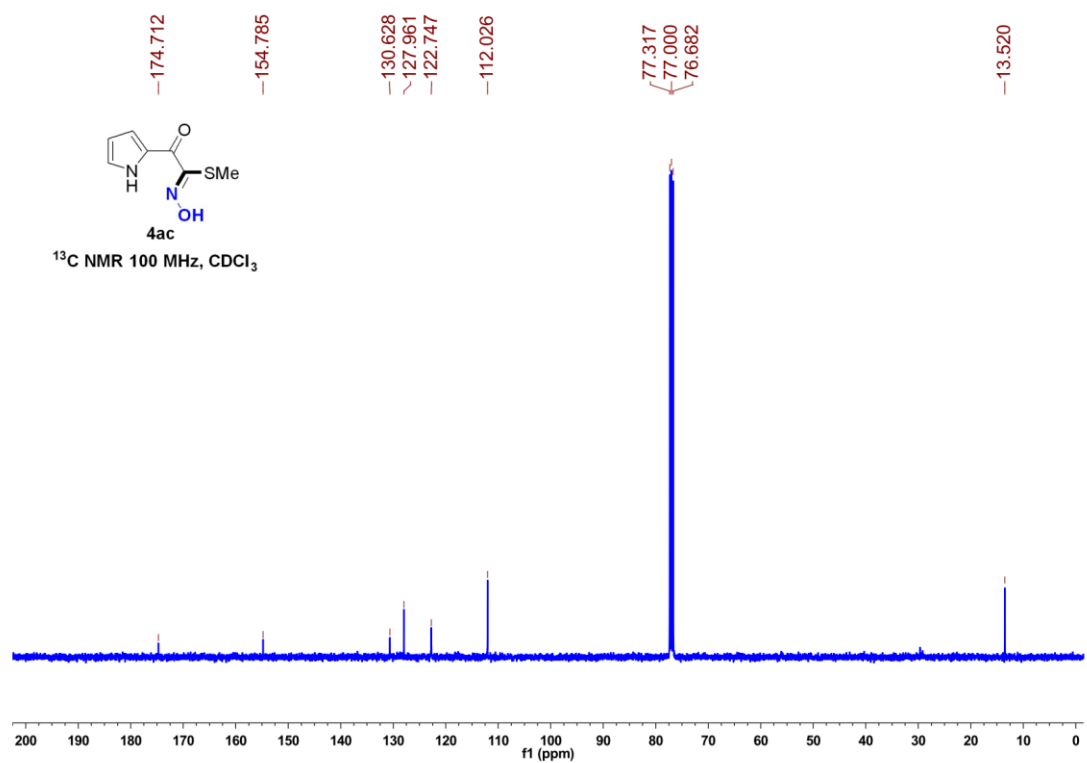

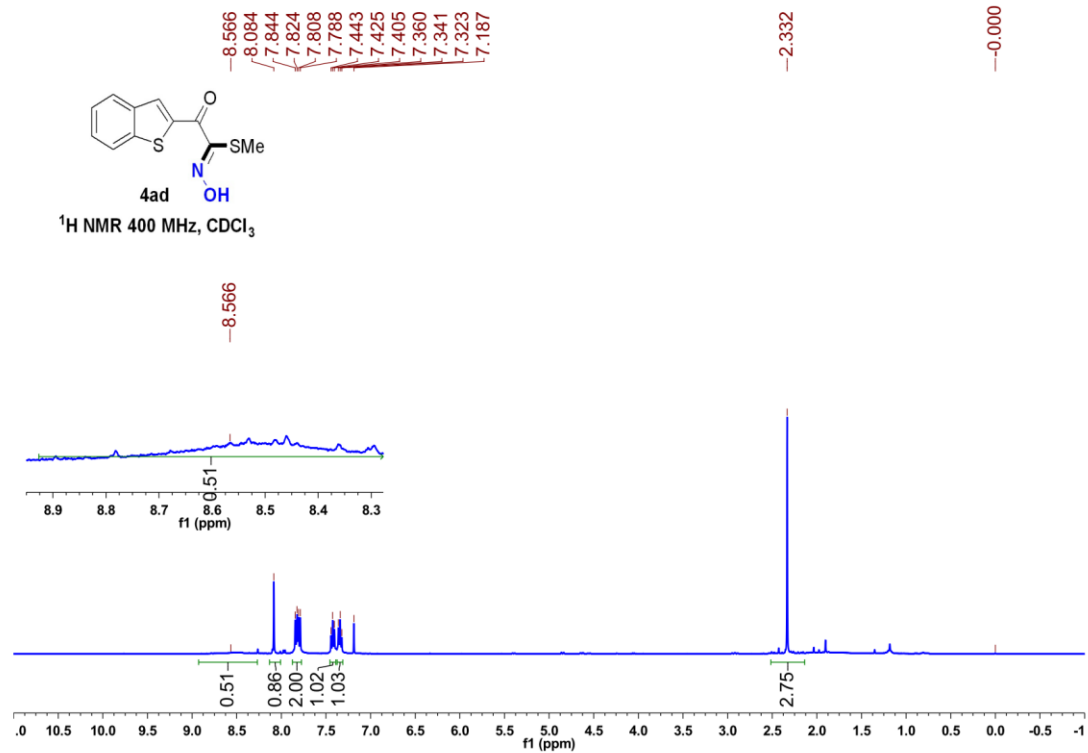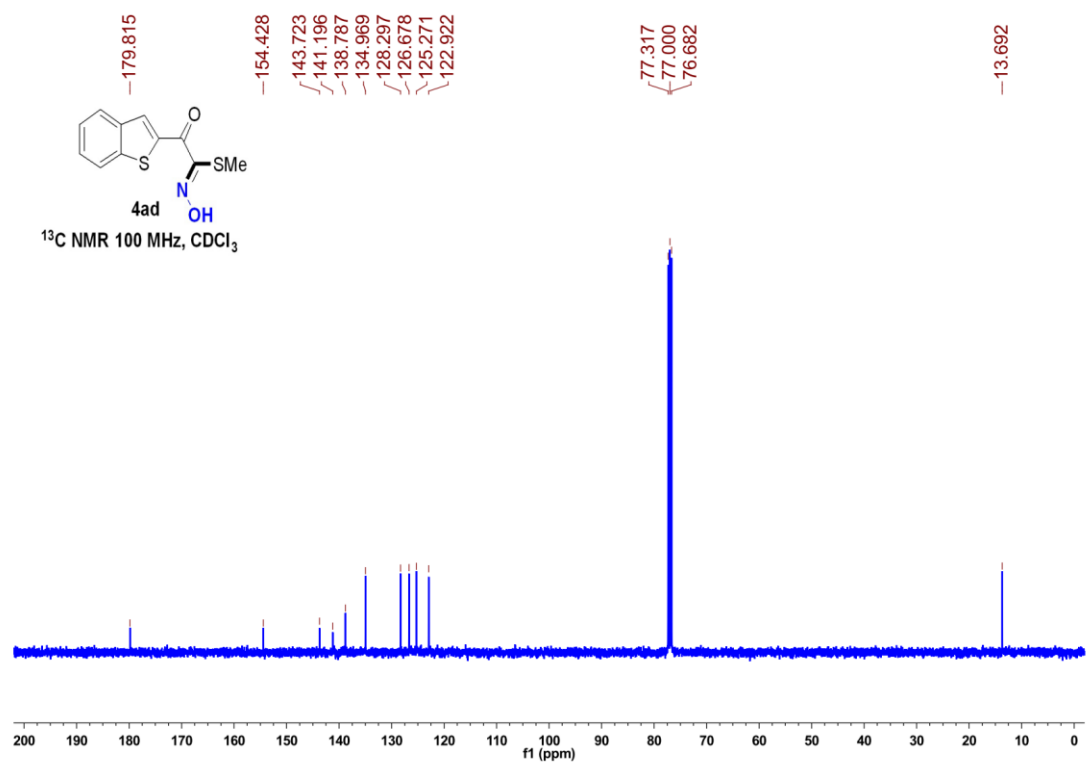

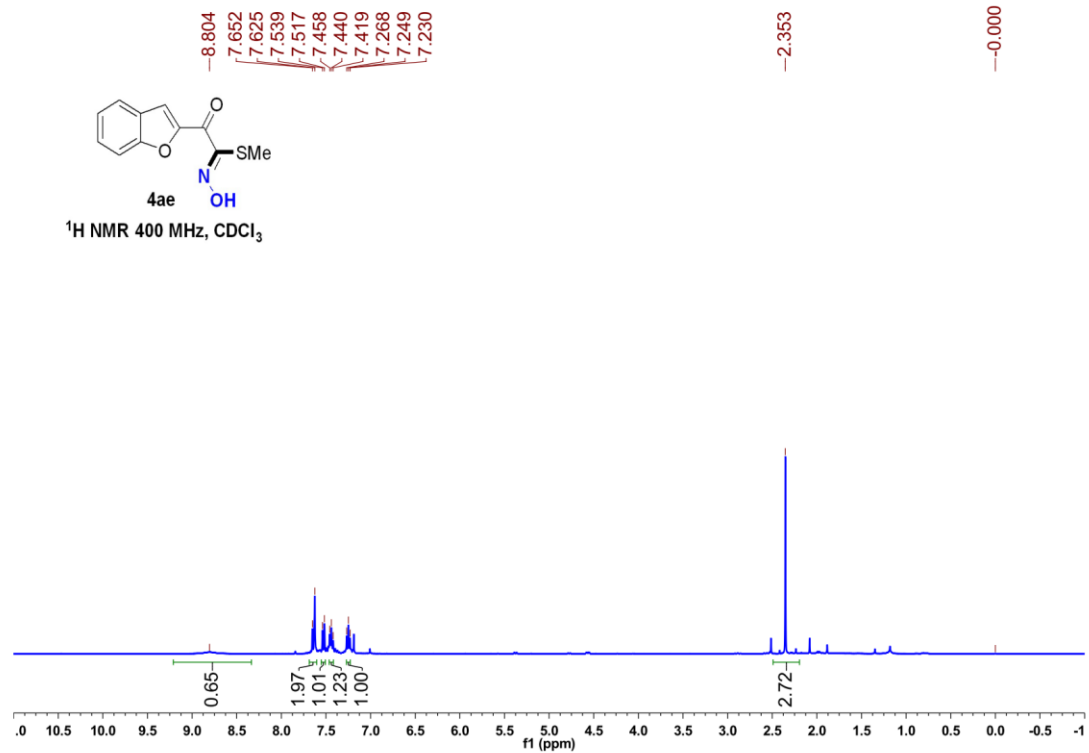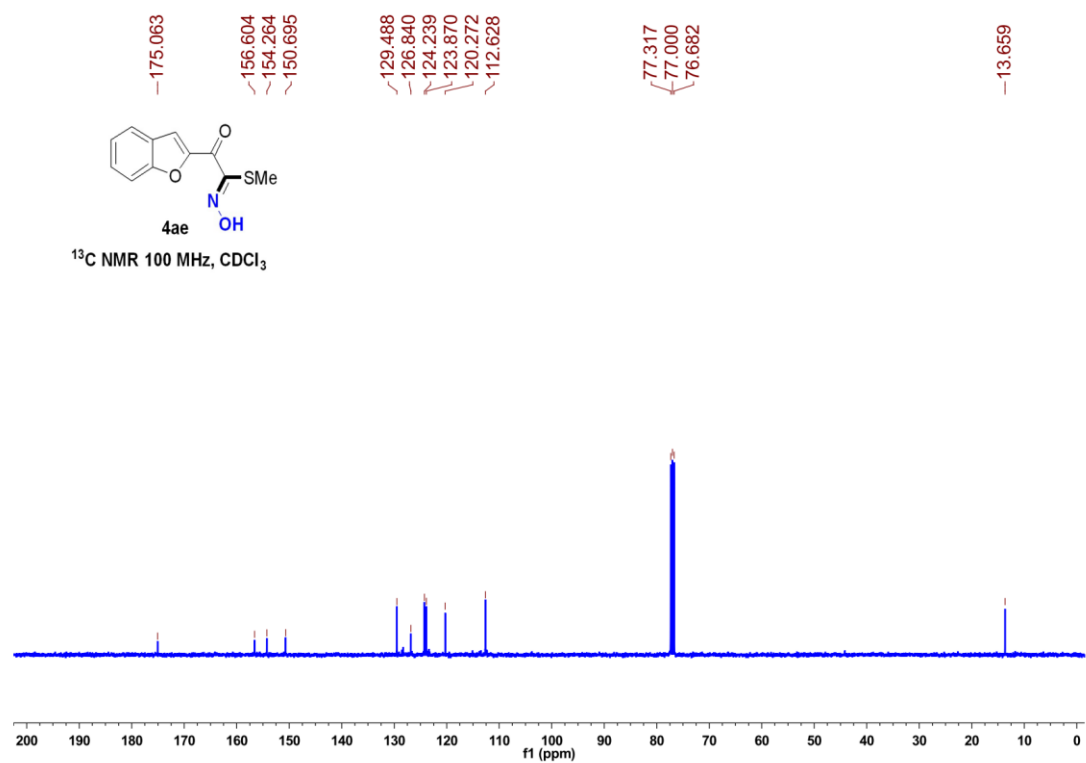

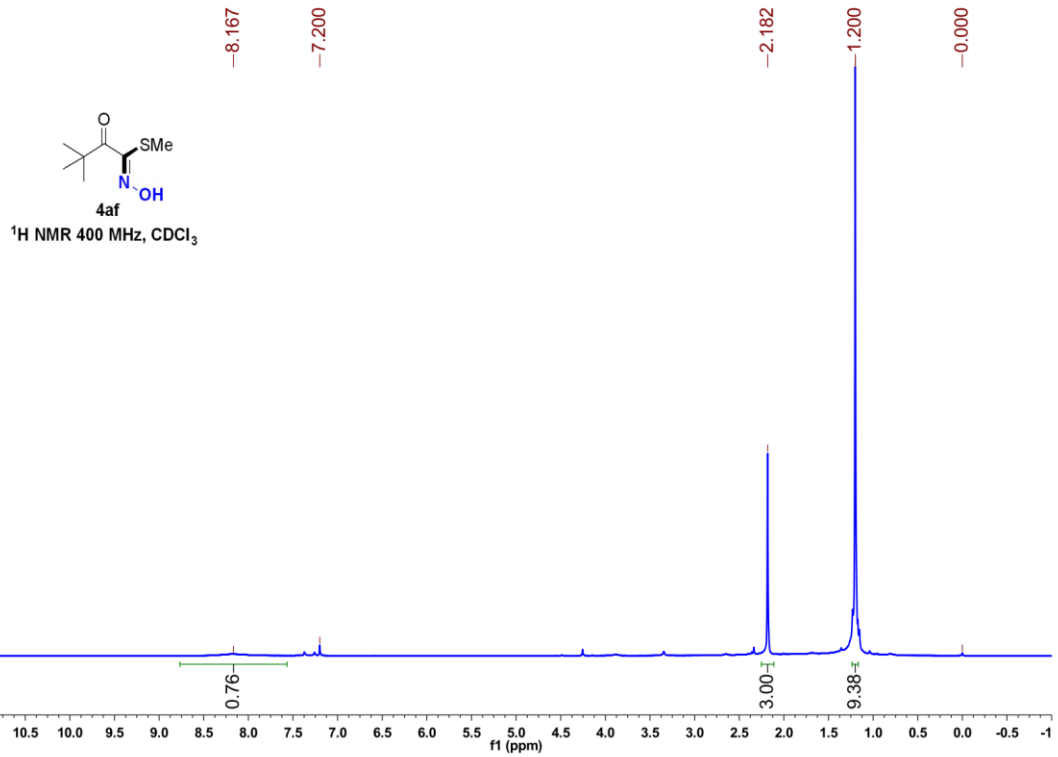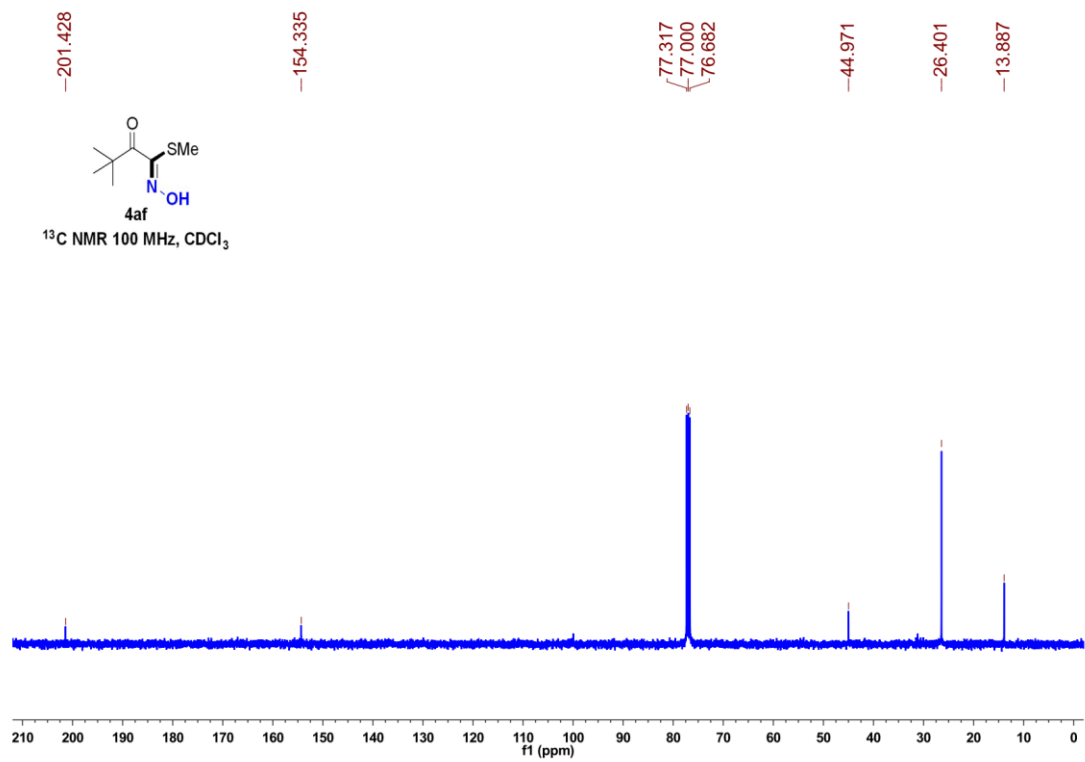

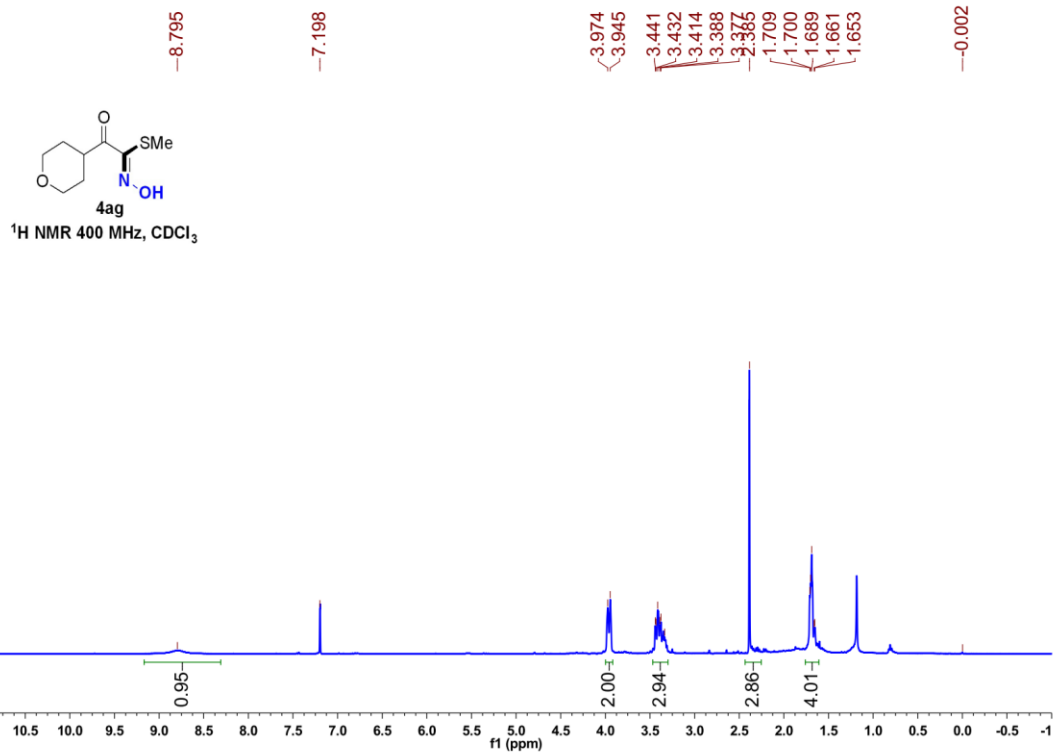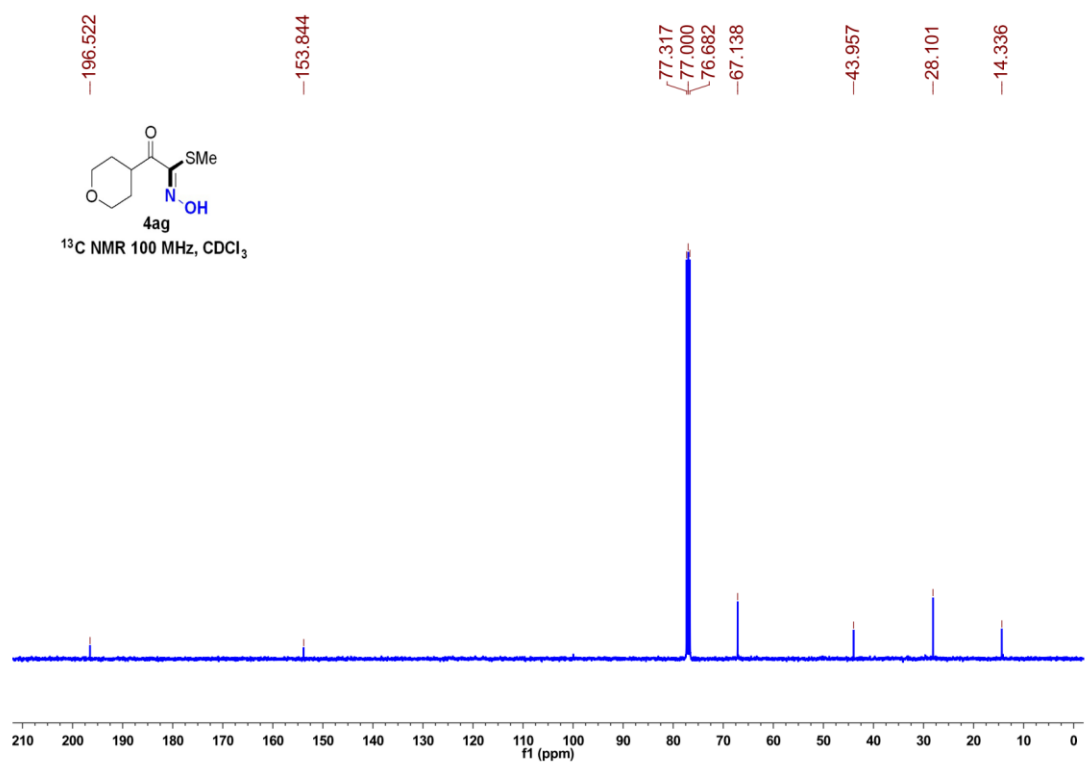



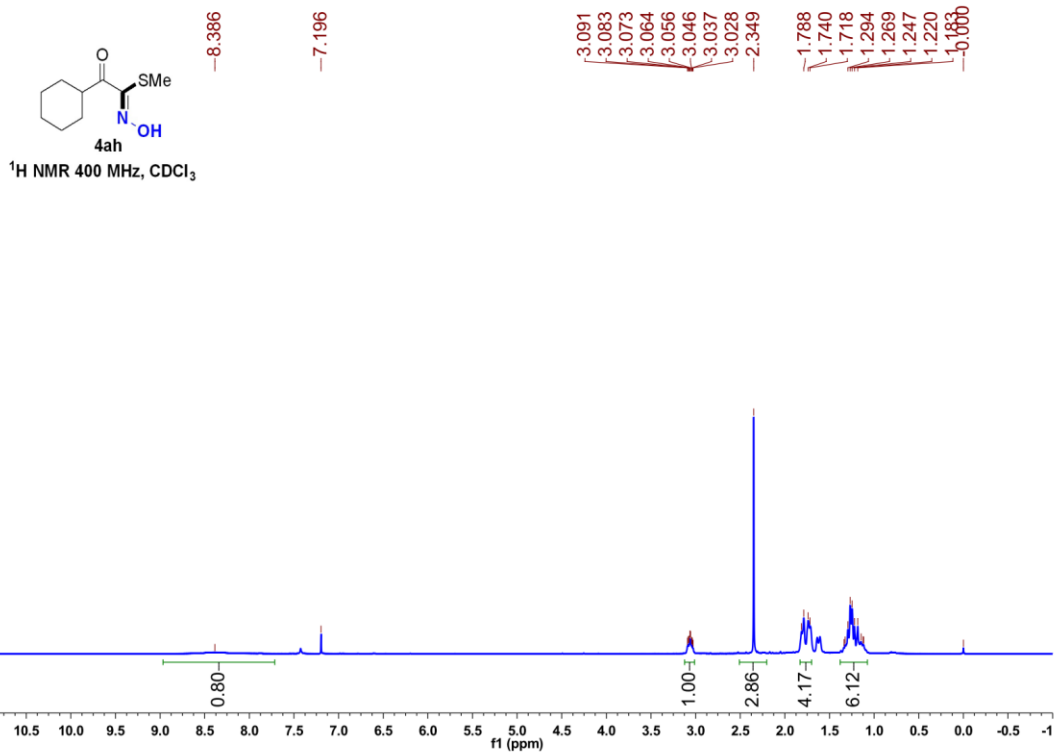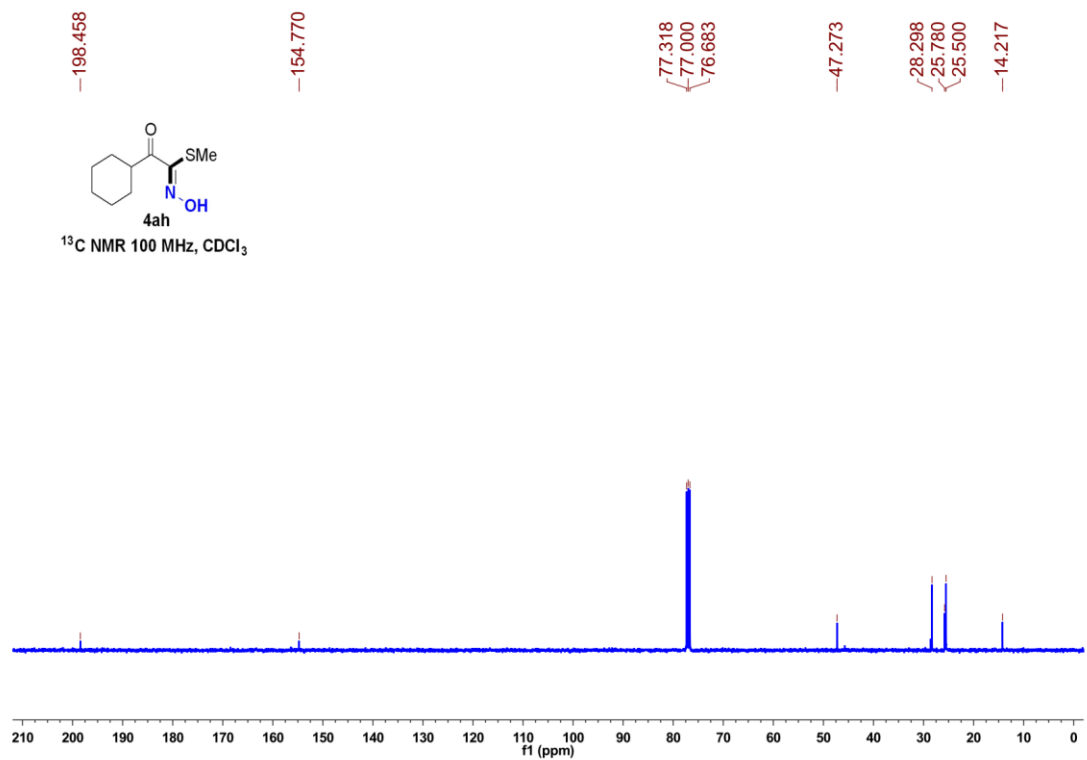

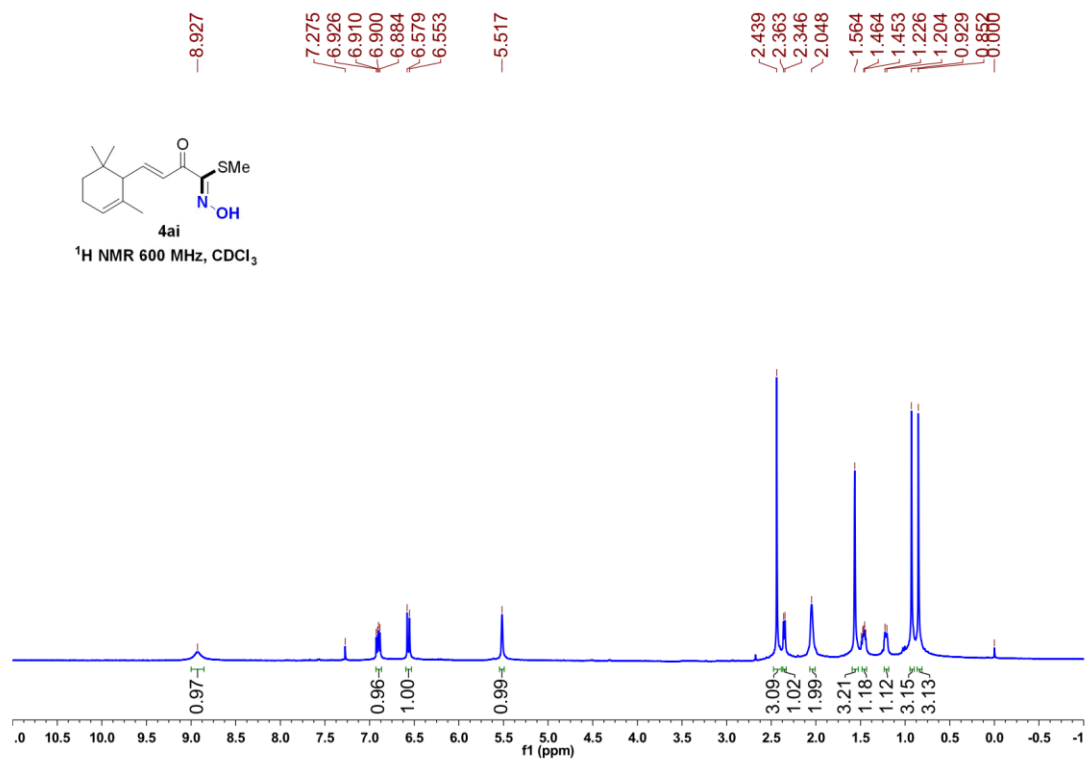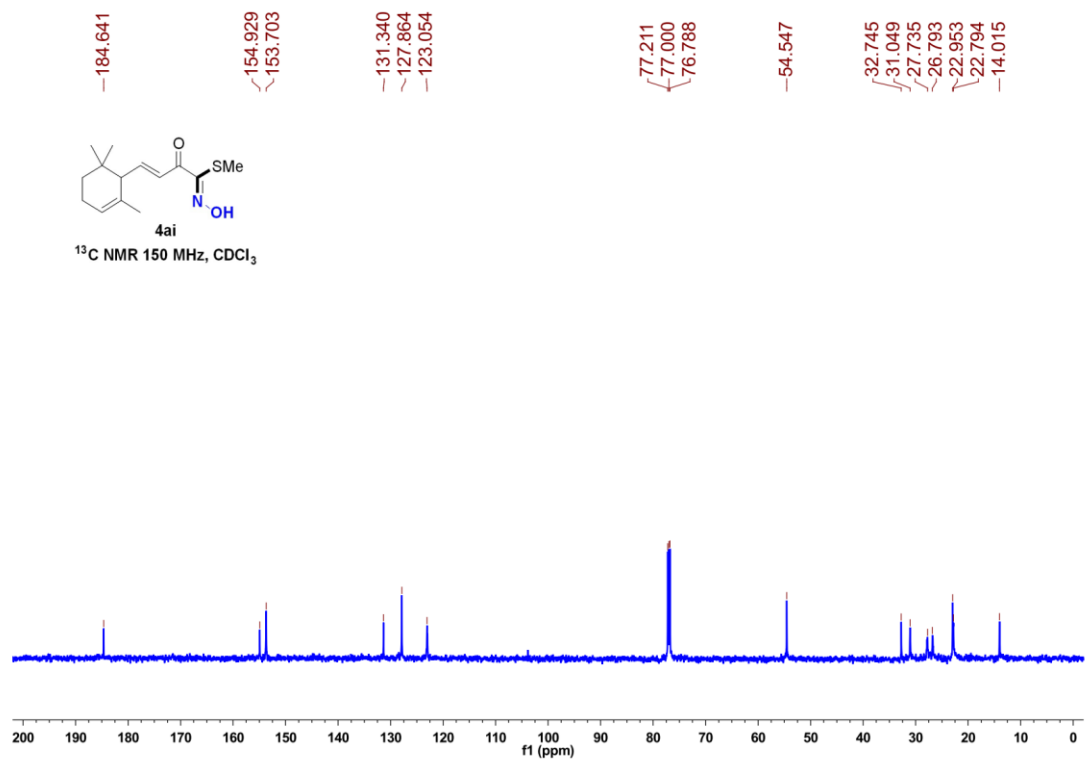

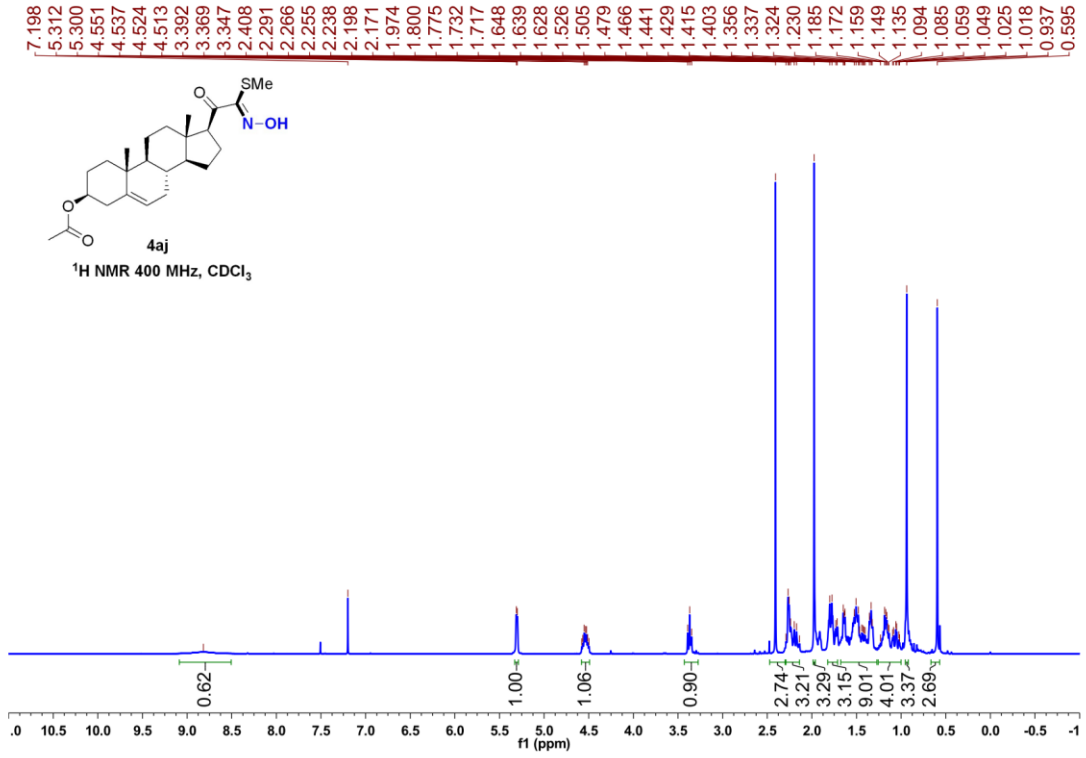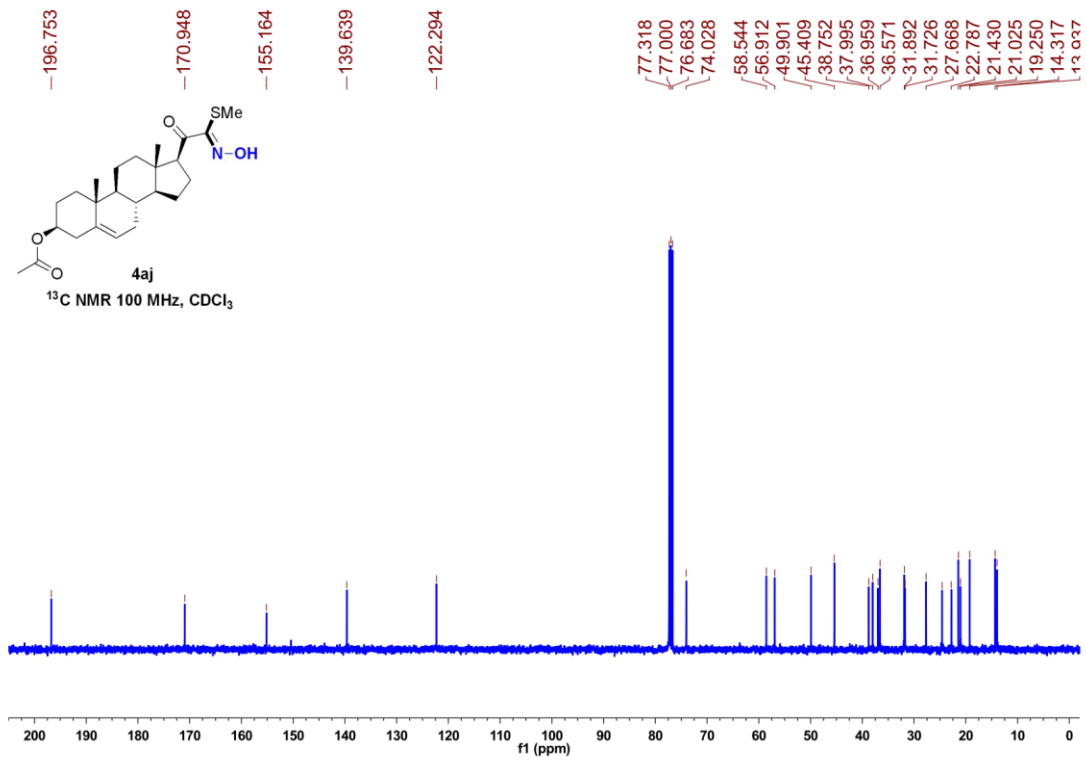

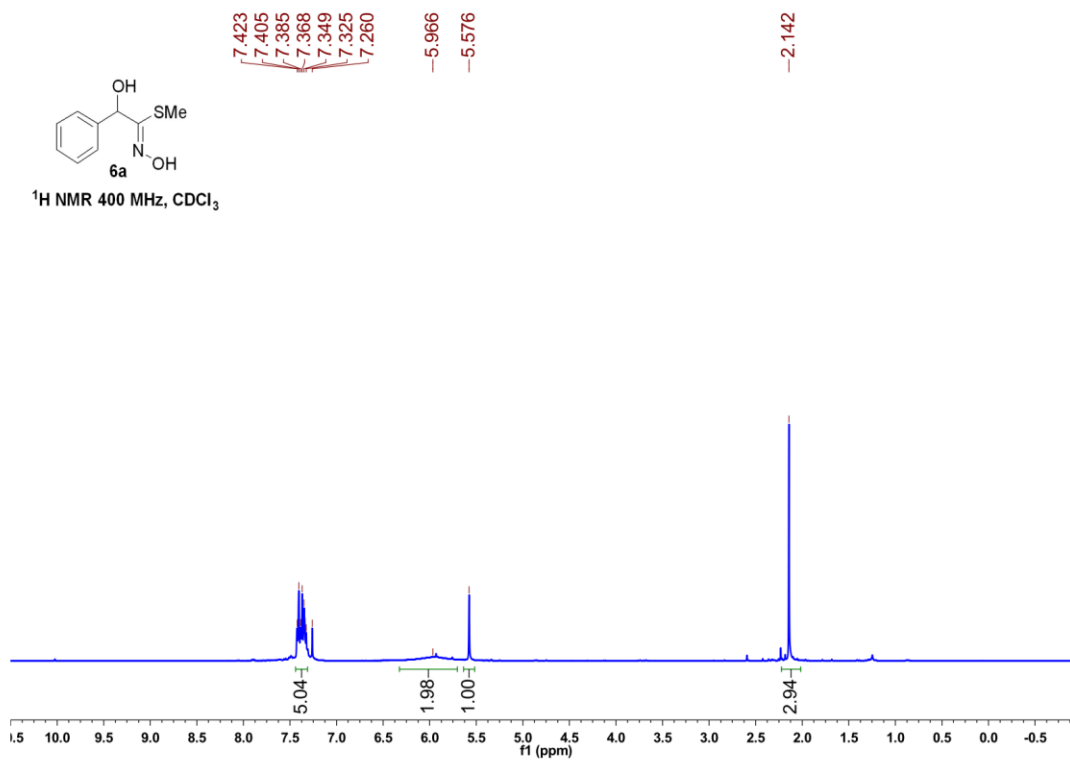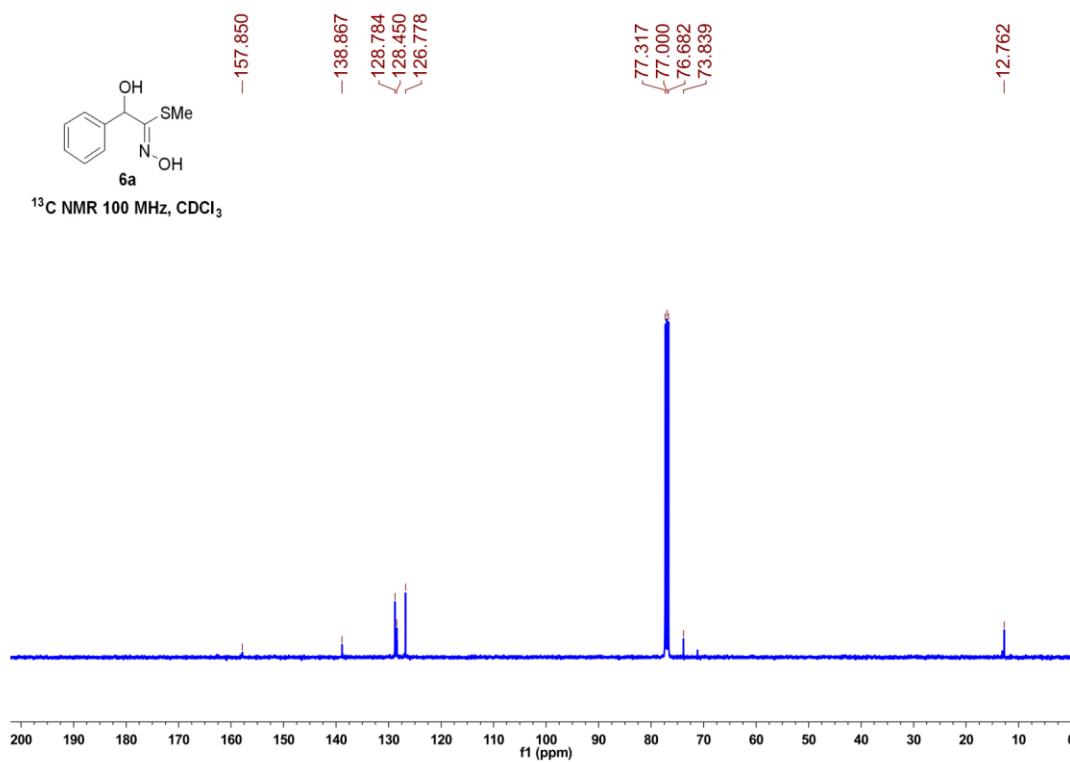

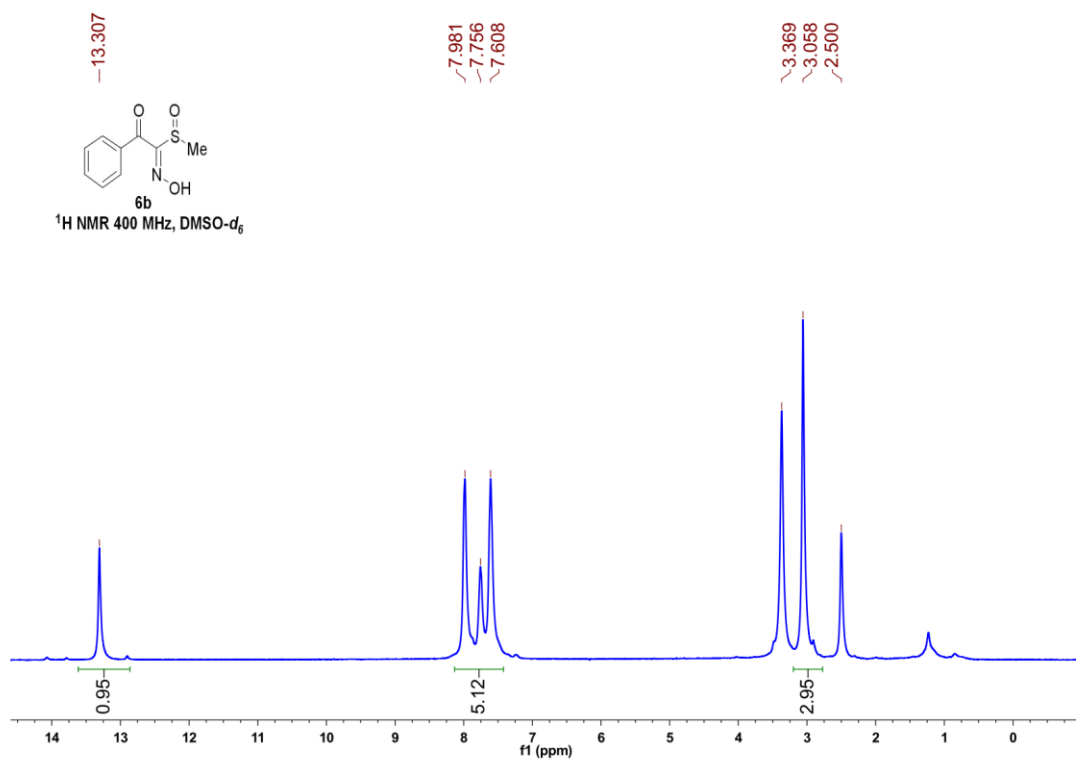

Supplement: d4ob01217h1.pdf [file d4ob01217h1.pdf]
